# Supplementary material for: Protocol of the Cognitive Health in Ageing Register: Investigational, Observational and Trial Studies in Dementia Research (CHARIOT): Prospective Readiness cOhort (PRO) SubStudy
Source: PubMed Central journal article supplement — BMJ Open. 2021 Jun 24;11(6):e043114. doi: 10.1136/bmjopen-2020-043114 (PMC8230926; doi:10.1136/bmjopen-2020-043114), 2021-06-24
Supplement: bmjopen-2020-043114.draft_revisions.pdf [file bmjopen-2020-043114.draft_revisions.pdf]

# BMJ Open

BMJ Open is committed to open peer review. As part of this commitment we make the peer review history of every article we publish publicly available.

When an article is published we post the peer reviewers' comments and the authors' responses online. We also post the versions of the paper that were used during peer review. These are the versions that the peer review comments apply to.

The versions of the paper that follow are the versions that were submitted during the peer review process. They are not the versions of record or the final published versions. They should not be cited or distributed as the published version of this manuscript.

BMJ Open is an open access journal and the full, final, typeset and author-corrected version of record of the manuscript is available on our site with no access controls, subscription charges or pay-per-view fees (<http://bmjopen.bmj.com>).

If you have any questions on BMJ Open's open peer review process please email [info.bmjopen@bmj.com](mailto:info.bmjopen@bmj.com)

# BMJ Open

## Protocol of The Cognitive Health in Ageing Register: Investigational, Observational and Trial Studies in Dementia Research (CHARIOT): Prospective Readiness cOhort (PRO) SubStudy

|                               |                                                                                                                                                                                                                                                                                                                                                                                                                                                                                                                                                                                                                                                                                                                                                                                                                                                                                                                                                                                                                                                                                                                                                                                                                                                                                                                                                                                                                                                                                                                                                                                                                                                                                                                                                                                                                                                                                                                                                                                                                                                                                                                                       |
|-------------------------------|---------------------------------------------------------------------------------------------------------------------------------------------------------------------------------------------------------------------------------------------------------------------------------------------------------------------------------------------------------------------------------------------------------------------------------------------------------------------------------------------------------------------------------------------------------------------------------------------------------------------------------------------------------------------------------------------------------------------------------------------------------------------------------------------------------------------------------------------------------------------------------------------------------------------------------------------------------------------------------------------------------------------------------------------------------------------------------------------------------------------------------------------------------------------------------------------------------------------------------------------------------------------------------------------------------------------------------------------------------------------------------------------------------------------------------------------------------------------------------------------------------------------------------------------------------------------------------------------------------------------------------------------------------------------------------------------------------------------------------------------------------------------------------------------------------------------------------------------------------------------------------------------------------------------------------------------------------------------------------------------------------------------------------------------------------------------------------------------------------------------------------------|
| Journal:                      | <i>BMJ Open</i>                                                                                                                                                                                                                                                                                                                                                                                                                                                                                                                                                                                                                                                                                                                                                                                                                                                                                                                                                                                                                                                                                                                                                                                                                                                                                                                                                                                                                                                                                                                                                                                                                                                                                                                                                                                                                                                                                                                                                                                                                                                                                                                       |
| Manuscript ID                 | bmjopen-2020-043114                                                                                                                                                                                                                                                                                                                                                                                                                                                                                                                                                                                                                                                                                                                                                                                                                                                                                                                                                                                                                                                                                                                                                                                                                                                                                                                                                                                                                                                                                                                                                                                                                                                                                                                                                                                                                                                                                                                                                                                                                                                                                                                   |
| Article Type:                 | Protocol                                                                                                                                                                                                                                                                                                                                                                                                                                                                                                                                                                                                                                                                                                                                                                                                                                                                                                                                                                                                                                                                                                                                                                                                                                                                                                                                                                                                                                                                                                                                                                                                                                                                                                                                                                                                                                                                                                                                                                                                                                                                                                                              |
| Date Submitted by the Author: | 17-Dec-2020                                                                                                                                                                                                                                                                                                                                                                                                                                                                                                                                                                                                                                                                                                                                                                                                                                                                                                                                                                                                                                                                                                                                                                                                                                                                                                                                                                                                                                                                                                                                                                                                                                                                                                                                                                                                                                                                                                                                                                                                                                                                                                                           |
| Complete List of Authors:     | <p>Udeh-Momoh, Chinedu ; Imperial College London, Ageing Epidemiology Research Unit, School of Public Health; University of Bristol, Translational Health Sciences, Bristol Medical School<br/>Watermeyer, Tamlyn; Northumbria University; The University of Edinburgh, Edinburgh Dementia Prevention, Centre for Clinical Brain Sciences<br/>Price, Geraint; Imperial College London, Ageing Epidemiology Research Unit, School of Public Health<br/>de-Jaegar Loots, Celeste; Imperial College London, Ageing Epidemiology Research Unit, School of Public Health<br/>Reglinska-Matveyev, Natalia; The University of Edinburgh, Edinburgh Dementia Prevention, Centre for Clinical Brain Sciences<br/>Ropacki, Michael; Janssen Research and Development Fremont<br/>Ketter, Nzeera; Janssen Alzheimer Immunotherapy Research and Development LLC<br/>Fogle, Michael; Janssen Research and Development LLC<br/>Raghavan, Nandini ; Janssen Research and Development LLC<br/>Arrighi, Michael ; Janssen Research and Development Fremont<br/>Brashear, Robert; Janssen Alzheimer Immunotherapy Research and Development LLC<br/>Di, Jianing; Janssen Research and Development Shanghai, Department of Biostatistics<br/>Baker, Susan; Janssen Research and Development LLC<br/>Giannakopoulou, Parthenia; Imperial College London, Ageing Epidemiology Research Unit, School of Public Health<br/>Robb, Catherine; Imperial College London, Ageing Epidemiology Research Unit, School of Public Health<br/>Bassil, Darina; Imperial College London, Ageing Epidemiology Research Unit, School of Public Health<br/>Cohn, Martin; Imperial College London, Ageing Epidemiology Research Unit, School of Public Health<br/>McLellan-Young, Heather; Imperial College London, Ageing Epidemiology Research Unit, School of Public Health<br/>Crispin, Jennifer; Imperial College London, Ageing Epidemiology Research Unit, School of Public Health<br/>Lakey, Kristina; Imperial College London, Ageing Epidemiology Research Unit, School of Public Health<br/>Lisa, Curry; Imperial College London, Ageing Epidemiology Research</p> |

|           |                                                                                                                                                                                                                                                                                                                                                                                                                                                                                                                                                                                                                                                                                                                                                                                                                                                                                                                                                                                                                                                                                                                                                                                                                                                                                                                                                                                                                                                                                                                                                                                                                                                                                                                                                                                                                                                                                                                                                                                                                                                                                            |
|-----------|--------------------------------------------------------------------------------------------------------------------------------------------------------------------------------------------------------------------------------------------------------------------------------------------------------------------------------------------------------------------------------------------------------------------------------------------------------------------------------------------------------------------------------------------------------------------------------------------------------------------------------------------------------------------------------------------------------------------------------------------------------------------------------------------------------------------------------------------------------------------------------------------------------------------------------------------------------------------------------------------------------------------------------------------------------------------------------------------------------------------------------------------------------------------------------------------------------------------------------------------------------------------------------------------------------------------------------------------------------------------------------------------------------------------------------------------------------------------------------------------------------------------------------------------------------------------------------------------------------------------------------------------------------------------------------------------------------------------------------------------------------------------------------------------------------------------------------------------------------------------------------------------------------------------------------------------------------------------------------------------------------------------------------------------------------------------------------------------|
|           | <p>Unit, School of Public Health<br/> Chowdary Seemulamoodi , Yellappa; Imperial College London, Ageing<br/> Epidemiology Research Unit, School of Public Health<br/> Kafetsouli, Dimitra; Imperial College London, Ageing Epidemiology<br/> Research Unit, School of Public Health<br/> Perera, Dinithi; Imperial College London, Ageing Epidemiology Research<br/> Unit, School of Public Health<br/> Car, Josip; Imperial College London, Department of Primary Care and<br/> Public Health, School of Public Health; Nanyang Technological University,<br/> Centre for Population Health Sciences (CePHaS), Lee Kong Chian School<br/> of Medicine<br/> Majeed, Azeem; Imperial College London, Department of Primary Care<br/> and Public Health, School of Public<br/> Ward, Heather; Imperial College London, Department of Epidemiology<br/> and Biostatistics, School of Public<br/> Ritchie, Karen; INSERM, University of Montpellier, Neuropsychiatry:<br/> Epidemiological and Clinical Research,; The University of Edinburgh,<br/> Edinburgh Dementia Prevention, Centre for Clinical Brain Sciences<br/> Perneckzy, Robert; Ludwig Maximilians University Munich, Department of<br/> Psychiatry and Psychotherapy, University Hospital ; Imperial College<br/> London, Ageing Epidemiology Research Unit, School of Public Health<br/> Kivipelto, Miia; Karolinska Institutet, Division of Clinical Geriatrics,<br/> Center for Alzheimer Research, Department of Neurobiology, Care<br/> Sciences and Society; Imperial College London, Ageing Epidemiology<br/> Research Unit, School of Public Health<br/> Scott, David; BioClinica Inc Newark California Office<br/> Bracoud, Luc; BioClinica Inc Lyon<br/> Saad, Ziad; Janssen Research and Development Fremont<br/> Novak, Gerald; Janssen Research and Development LLC<br/> Ritchie, Craig; The University of Edinburgh, Edinburgh Dementia<br/> Prevention, Centre for Clinical Brain Sciences<br/> Middleton, Lefkos; Imperial College London, Ageing Epidemiology<br/> Research Unit, School of Public Health</p> |
| Keywords: | <p>EPIDEMIOLOGY, Dementia &lt; NEUROLOGY, PREVENTIVE MEDICINE, Old<br/> age psychiatry &lt; PSYCHIATRY</p>                                                                                                                                                                                                                                                                                                                                                                                                                                                                                                                                                                                                                                                                                                                                                                                                                                                                                                                                                                                                                                                                                                                                                                                                                                                                                                                                                                                                                                                                                                                                                                                                                                                                                                                                                                                                                                                                                                                                                                                 |
|           |                                                                                                                                                                                                                                                                                                                                                                                                                                                                                                                                                                                                                                                                                                                                                                                                                                                                                                                                                                                                                                                                                                                                                                                                                                                                                                                                                                                                                                                                                                                                                                                                                                                                                                                                                                                                                                                                                                                                                                                                                                                                                            |

SCHOLARONE™  
Manuscripts

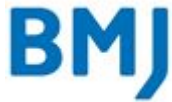

I, the Submitting Author has the right to grant and does grant on behalf of all authors of the Work (as defined in the below author licence), an exclusive licence and/or a non-exclusive licence for contributions from authors who are: i) UK Crown employees; ii) where BMJ has agreed a CC-BY licence shall apply, and/or iii) in accordance with the terms applicable for US Federal Government officers or employees acting as part of their official duties; on a worldwide, perpetual, irrevocable, royalty-free basis to BMJ Publishing Group Ltd ("BMJ") its licensees and where the relevant Journal is co-owned by BMJ to the co-owners of the Journal, to publish the Work in this journal and any other BMJ products and to exploit all rights, as set out in our [licence](#).

The Submitting Author accepts and understands that any supply made under these terms is made by BMJ to the Submitting Author unless you are acting as an employee on behalf of your employer or a postgraduate student of an affiliated institution which is paying any applicable article publishing charge ("APC") for Open Access articles. Where the Submitting Author wishes to make the Work available on an Open Access basis (and intends to pay the relevant APC), the terms of reuse of such Open Access shall be governed by a Creative Commons licence – details of these licences and which [Creative Commons](#) licence will apply to this Work are set out in our licence referred to above.

Other than as permitted in any relevant BMJ Author's Self Archiving Policies, I confirm this Work has not been accepted for publication elsewhere, is not being considered for publication elsewhere and does not duplicate material already published. I confirm all authors consent to publication of this Work and authorise the granting of this licence.

1  
2  
3 **Protocol of The Cognitive Health in Ageing Register: Investigational, Observational and**  
4 **Trial Studies in Dementia Research (CHARIOT): Prospective Readiness cOhort (PRO)**  
5 **SubStudy**  
6  
7

8  
9 DOCUMENT: Manuscript (Epidemiology)  
10

11 TARGET JOURNAL: British Medical Journal – Open Access (BMJOpen)  
12

13  
14 Abstract: 300 words  
15

16 Manuscript text: 5035 words (excluding references)  
17

18 References: 33  
19

20  
21 Tables and Figures: 1 Table and 3 figures  
22  
23  
24  
25  
26  
27  
28  
29  
30  
31  
32  
33  
34  
35  
36  
37  
38  
39  
40  
41  
42  
43  
44  
45  
46  
47  
48  
49  
50  
51  
52  
53  
54  
55  
56  
57  
58  
59  
60

1  
2  
3 Chinedu Udeh-Momoh, PhD<sup>1,2</sup>, Tamlyn Watermeyer, PhD<sup>3,4</sup>, Geraint Price, DClinPsych<sup>1</sup>,  
4 Celeste A de-Jager Loots, PhD<sup>1</sup>, Natalia Reglinska-Matveyev, PhD<sup>3</sup>, Michael T. Ropacki,  
5 PhD<sup>5</sup>, Michael Fogle, MSc<sup>7</sup>, Nzeera Ketter, MD<sup>6</sup>, Nandini Raghavan, PhD<sup>7</sup>, H. Michael  
6 Arrighi, PhD<sup>5</sup>, H. Robert Brashear, MD<sup>6</sup>, Jianing Di, PhD<sup>8</sup>, Susan Baker, PhD<sup>7</sup>, Parthenia  
7 Giannakopoulou, PhD<sup>1</sup>, Catherine Robb, PhD<sup>1</sup>, Darina T. Bassil, PhD<sup>1</sup>, Martin Cohn MD<sup>1</sup>,  
8 Heather McLellan-Young MSc.<sup>1</sup>, Jennifer Crispin BA.<sup>1</sup>, Kristina Lakey BSc.<sup>1</sup>, Lisa K. Curry  
9 MSc.<sup>1</sup>, Yellappa Chowdary Seemulamoodi MD<sup>1</sup>, Dimitra Kafetsouli, MD, PhD<sup>1</sup>, Dinithi  
10 Perera, LL.M<sup>1</sup>, Josip Car, MD<sup>9,10</sup>, Azeem Majeed, MD<sup>9</sup>, Heather A. Ward, PhD<sup>11</sup>, Karen  
11 Ritchie, PhD<sup>3,12</sup>, Robert Pernecky, Prof. MD<sup>1,13,14,15</sup>, Miia Kivipelto, MD, PhD<sup>1,16,17,18</sup>,  
12 David Scott, PhD<sup>19</sup>, Luc Bracoud, MSc<sup>20</sup>, Ziad Saad PhD<sup>5</sup>, Gerald Novak MD<sup>7\*</sup>, Craig  
13 Ritchie, MD, PhD<sup>3</sup> and Lefkos Middleton, MD<sup>1</sup>

14  
15  
16  
17  
18  
19  
20  
21  
22  
23 <sup>1</sup>Imperial College London, Ageing Epidemiology Research Unit, School of Public Health,  
24 London, W6 8RP, UK

25  
26  
27 <sup>2</sup>Translational Health Sciences, Bristol Medical School, University of Bristol, Bristol, UK

28  
29  
30  
31 <sup>3</sup>Edinburgh Dementia Prevention, Centre for Clinical Brain Sciences, University of  
32 Edinburgh, Edinburgh, UK

33  
34  
35  
36 <sup>4</sup>Department of Psychology, Faculty of Health and Life Sciences, Northumbria University,  
37 Newcastle, UK

38  
39  
40  
41  
42  
43 <sup>5</sup>Janssen Research & Development, LLC, Fremont, California, 94555, USA

44  
45  
46  
47  
48  
49 <sup>6</sup>Janssen Alzheimer Immunotherapy Research & Development, LLC, South San Francisco,  
50 California 94080, USA

51  
52  
53  
54  
55  
56  
57  
58  
59  
60 <sup>7</sup>Janssen Research & Development, LLC, Titusville, NJ 08560, USA

<sup>8</sup>Janssen China Research and Development Center, Department of Biostatistics, Shanghai,  
China

<sup>9</sup>Imperial College London, Department of Primary Care and Public Health, School of Public  
Health, London, W6 8RP, UK

<sup>10</sup>Centre for Population Health Sciences (CePHaS), Lee Kong Chian School of Medicine,  
Nanyang Technological University, 308232 Singapore, Singapore

1  
2  
3 <sup>11</sup>Imperial College London, Department of Epidemiology and Biostatistics, School of Public  
4 Health, London, W3 1PG, UK

5  
6  
7 <sup>12</sup>INSERM, University of Montpellier, Neuropsychiatry: Epidemiological and Clinical  
8 Research, Montpellier, France

9  
10  
11 <sup>13</sup>University Hospital, LMU Munich, Department of Psychiatry and Psychotherapy, 80336  
12 München, Germany

13  
14  
15 <sup>14</sup>German Center for Neurodegenerative Diseases (DZNE) Munich, 81377 München,  
16 Germany

17  
18  
19 <sup>15</sup>Munich Cluster for Systems Neurology (SyNergy), Munich, Germany

20  
21  
22 <sup>16</sup>Public Health Promotion Unit, National Institute for Health and Welfare (THL), Helsinki,  
23 Finland. [mia.kivipelto@ki.se](mailto:mia.kivipelto@ki.se).

24  
25  
26 <sup>17</sup>Division of Clinical Geriatrics, Center for Alzheimer Research, Department of  
27 Neurobiology, Care Sciences and Society, Karolinska Institutet, Stockholm, Sweden.

28  
29  
30 <sup>18</sup>Institute of Clinical Medicine, Neurology, University of Eastern Finland, Kuopio, Finland.

31  
32  
33 <sup>19</sup>Bioclinica Inc, Newark, CA 94560 USA

34  
35  
36 <sup>20</sup>Bioclinica Inc, Lyon, France

37  
38  
39  
40 \*Corresponding author: Gerald Novak, MD; Janssen Research & Development, LLC, 1125  
41 Trenton-Harbourton Rd., Titusville, NJ 08560, USA. E-mail: [gnovak1@its.jnj.com](mailto:gnovak1@its.jnj.com)

#### 42 43 44 45 46 **Trial Registration**

47  
48 The CHARIOT:PRO SubStudy is registered with [clinicaltrials.gov](https://clinicaltrials.gov) (NCT02114372). Notices  
49 of Protocol modifications will be made available through this trial registry.

#### 50 51 52 **Funding statement**

53  
54 This work was supported by Janssen Pharmaceuticals Research & Development, LLC  
55  
56  
57  
58  
59  
60

### Competing Interests Statement:

The study is funded by Janssen Research & Development, LLC. Michael T. Ropacki was formerly employee of Janssen and is an industry consultant. Gerald Novak, Susan Baker, H. Michael Arrighi, Michael Fogle, Keith Karcher, Ziad Saad and Nandini Raghavan are employees of Janssen Research & Development, LLC and own stock/stock options in the company. Nzeera Ketter and H. Robert Brashear are former employees of Janssen Research & Development, LLC and both own stock/stock options in the company. Jianing Di is an employee of Janssen China Research and Development Center and owns stock/stock options in the company. Lefkos Middleton served as principal study investigator at Imperial College of London (ICL) and has held consultancy agreements, in the last five years, with Eli Lilly, Astra Zeneca and Takeda and is National Coordinator for the TOMMORROW, Amaranth and Generation Clinical Studies; and does not hold any agreement with any of the funders in relation to patents, products in development relevant to this study or marketed products. Craig Ritchie served as principal study investigator at Edinburgh University (EDI), and has served as a consultant in the last five years for: Actinogen, Biogen, Roche Pharmaceuticals and Roche Diagnostics, Eisai, Abbott Pharmaceuticals, Eli Lilly, Kyowa Kirin, Signant Health, Merck and Nutricia. He is also the Chief Investigator and Co-coordinator of IMI-EPAD which is a public-private partnership of 39 partners [www.ep-ad.org](http://www.ep-ad.org).

Chinedu Udeh-Momoh, Josip Car, Robert Pernecky, Geraint Price, Celeste de-Jager Loots, Heather Ward and Miia Kivipelto served as co-principal study investigators at ICL for Janssen Research & Development, LLC and all declare no conflict of interest. Josip Car's and Azeem Majeed's posts at ICL are in part supported by the NIHR NW London Applied Research Collaboration. Catherine Robb, Darina Bassil, Martin Cohn, Parthenia Giannakopoulou, Dimitra Kafetsouli, Yellappa Chowdary-Seemulamoodi, Dinithi Perera, Lisa Curry, Kristina Lakey, Heather McLellan-Young, Jennifer Crispin and Azeem Majeed were study investigators at ICL and declare no conflict of interest. Karen Ritchie served as co-principal study investigator at EDI for Janssen Research & Development, LLC and declares no conflict of interest. Tamlyn Watermeyer and Natalia Reglinska-Matveyev were study investigators at EDI and declare no conflict of interest. David Scott and Luc Bracoud are employees of Bioclinica Inc. and declare no competing interests.



## ABSTRACT

**Introduction:** The CHARIOT:PRO SubStudy (CPSS), sponsored by Janssen Pharmaceutical Research & Development LLC, is an Alzheimer's disease (AD) biomarker enriched observational study. CPSS aims to identify and validate determinants of AD, alongside cognitive, functional and biological changes in older adults with or without detectable evidence of AD pathology at baseline.

**Methods and Analysis:** CPSS is a dual-site longitudinal cohort (3.5 years) assessed quarterly. Cognitively normal participants (60-85 years) were recruited across Greater London (n=2508) and Edinburgh (n=1695). Participants are classified as high, medium (amnesic or non-amnesic) or low risk for developing mild cognitive impairment–Alzheimer's disease (MCI-AD) based on their Repeatable Battery for the Assessment of Neuropsychological Status (RBANS) performance at screening. Additional AD-related assessments include: a novel cognitive composite, the Global Preclinical Alzheimer's Cognitive Composite (G-PACC), brain magnetic resonance imaging (MRI) and positron emission tomography (PET) and cerebrospinal fluid (CSF) analysis. Lifestyle, other cognitive and functional data, as well as bio-samples (blood, urine, and saliva) are collected. Primarily, study analyses will evaluate longitudinal change in cognitive and functional outcomes. Annual interim analyses for descriptive data occur throughout the course of the study, although inferential statistics are conducted as required.

**Ethics and Dissemination:** CPSS has received national and local ethics approvals required for each participating site. The study is at the forefront of global AD prevention efforts, with frequent and robust sampling of the well-characterised cohort, allowing for detection of incipient pathophysiological, cognitive and functional changes that could inform therapeutic strategies to prevent and/or delay cognitive impairment and dementia. Dissemination of results will target the scientific community, research participants, volunteer community, public, industry, regulatory authorities and policymakers. Upon study completion, and following a predetermined embargo period, CPSS data is planned to be made accessible for analysis to facilitate further research into the determinants of AD pathology, onset of symptomatology and progression.

**Key Words:** Epidemiology; Neurology; Psychiatry; Dementia; Preventative Medicine

## STRENGTHS AND LIMITATIONS

### Strengths

- Prospectively-designed, high-powered longitudinal cohort of cognitively-healthy (at baseline) elders across the Alzheimer's pathological continuum followed up at high-throughput
- Deep and frequent phenotyping of participants with extensive biological, psychosocial, cognitive, behavioural and lifestyle measures will enable robust interrogation of the determinants of Alzheimer's disease (AD) progression and symptom development.
- High frequency (quarterly) follow-up of participants will facilitate determination of assessments most sensitive for identifying the earliest signs and symptoms of AD-dementia
- Study adopts a unique cognition-based classification method for designating risk of MCI-AD development from baseline.
- The conduct of the study at only 2 sites minimized several sources of variability that are independent of aging and incipient Alzheimer's disease (e.g., inter-rater variability and differences in psychometric equivalence among different translations).

### Limitations:

- Given the low amyloid positivity rate and the requirement of an equal number of CPSS participants above and below threshold, a high number of participants (78.6%) were excluded from the longitudinal CPSS study. As a mitigating measure, enrichment criteria were introduced, with requirement of first-degree family history in volunteers aged 60-65.
- Following completion of enrolment, but prior to any participants reaching end of study, the outbreak of the COVID-19 epidemic required suspension of in-clinic assessments.
- The conduct of the study at only 2 sites does not fit the model of a typical, multi-site international clinical trial.

## INTRODUCTION

**Background and Rationale:** The last few decades have witnessed unparalleled growth in aged populations. Hence, the global incidence and prevalence of Alzheimer's disease (AD), the most-common form of late-onset dementia, continue to increase exponentially, with numbers expected to exceed 150 million global cases by 2050 [1]. The paucity of any viable therapy for dementia prevention and/or disease modification necessitates a re-think of the conventional approach towards preventative research. Indeed, the AD field will benefit from concerted efforts for preventative strategies combining biomarker discovery studies with detailed validation of clinical characteristics as well as longitudinal explorations of associated pathologies and symptoms.

The asymptomatic stage of AD is characterized by biomarker evidence of amyloid- $\beta$  ( $A\beta$ ) deposition, as measured by either low cerebrospinal fluid (CSF)  $A\beta_{42}$  peptide concentrations or elevated tracer uptake on  $A\beta$  positron emission tomography (PET) scans [2]. Multiple studies have now reported that higher  $A\beta$  burden in cognitively normal (CN) individuals is associated with measurably poorer performance in neuropsychological tests [3]. The accumulating longitudinal data also strongly suggest that evidence of abnormal levels of  $A\beta$  deposition in CN individuals increases the risk for cognitive decline and progression to mild cognitive impairment (MCI) and AD dementia [3]. The current consensus among members of the Alzheimer's scientific community is that these CN individuals with detectable pathogenic  $A\beta$  represent an early stage on the AD continuum [2,4,5]. Indeed, a meta-analysis of 55 studies suggested that approximately 20% to 35% of study participants aged over 60 years without dementia symptoms are likely to have above-threshold pathogenic  $A\beta$  pathology detected by PET [6], with numbers increasing to 90% by age 85 [7].

Rate of cognitive decline in CN individuals with or without evidence of abnormal  $A\beta$  deposition can be measured using sensitive cognitive composite instruments. These measures focus on the cognitive domains affected earliest in AD, namely episodic memory and executive function, with decline noted as early as 7 to 10 years prior to the diagnosis of MCI or AD dementia [8–10]. Yet, gaps remain in our understanding of the exact predictors of AD pathological onset, accumulation and resultant development of clinical symptoms. There is a need to identify individuals at varying levels of risk for AD, prior to development of AD dementia. Such information would be useful to improve our understanding of the natural history of AD progression and identify opportunities for intervention.

1  
2  
3 The CHARIOT:PRO program seeks to address such gaps via detailed explorations of the  
4 determinants of AD-related biological, clinical and cognitive changes. The previously-reported  
5 main study of 987 participants at ICL, conducted from 2013 to 2016 (following early  
6 termination by the study Sponsor) [11] was further adapted into a large prospective  
7 observational trial – The CHARIOT: PRO SubStudy (CPSS) aimed at enhancing the scientific  
8 robustness of the main study objectives with the addition of imaging and other AD-related  
9 assessment tools.

10  
11 Here we describe the protocol (from Amendment version 15, dated 15<sup>th</sup> Aug 2018) of this  
12 biomarker enriched CPSS featuring neuropsychological, functional, lifestyle, imaging and  
13 other biomarker assessments and the schedule for their collection. We provide an outline of the  
14 study design and a summary of the recruitment and screening process leading to the fully  
15 enrolled cohort of 519 cognitively unimpaired adults.

16  
17 **Objectives of the CPSS:** CPSS is a prospective dual-centre, UK cohort study that at its core  
18 aims to characterise deeply the clinico-biological attributes of the non-symptomatic AD stage  
19 in individuals at differing levels of risk for development of MCI and AD-dementia, based on  
20 cognitive test scores at screening. CPSS participants thus could form a readiness cohort to be  
21 recruited onto future AD-dementia prevention trials.

22  
23 Specifically, using data from participants with evidence of detectable A $\beta$  pathology versus  
24 those with below-threshold levels, the study will:

- 25  
26  
27  
28  
29  
30  
31  
32  
33  
34  
35  
36  
37  
38  
39  
40  
41  
42  
43  
44  
45  
46  
47  
48  
49  
50  
51  
52  
53  
54  
55  
56  
57  
58  
59  
60
- Investigate the longitudinal change of the global and composite measures of the newly-developed Global Preclinical Alzheimer's Cognitive Composite (G-PACC) in comparison to the Repeatable Battery for the Assessment of Neuropsychological Status [RBANS, 12] and other study neuropsychological assessments, as well as psychometrically evaluate the test batteries
  - Determine precise baseline predictors of longitudinal AD-related cognitive and functional decline, and clinical progression to improve future screening of participants most likely to develop MCI-AD/ AD dementia

## METHODS

### Population

The CPSS participants are adults aged 60 to 85 years old (inclusive), residing in Greater London, South West England, Edinburgh and surrounding districts. Those included had documented evidence of A $\beta$  pathology (A $\beta$  positives: above-threshold brain A $\beta$  deposition on PET or below-threshold CSF A $\beta_{42}$  concentration), or evidence of below-threshold A $\beta$  pathology (A $\beta$  negatives: below-threshold brain A $\beta$  deposition on PET or above-threshold CSF A $\beta_{42}$  concentration), and a baseline global Clinical Dementia Rating (CDR) score=0. CPSS participants were classified at screening as *high*, *medium-amnesic* or *non-amnesic*, or *low* risk for developing MCI due to AD (MCI-AD), based on cognitive test performance as described previously [11].

### Study Design

The CPSS is a UK prospective observational study taking place across two sites (ICL and EDI). The study is planned to follow approximately 250 CN participants who are A $\beta$  positive and approximately 250 A $\beta$  negative CN control participants for up to three and a half years. Evidence of A $\beta$  pathology was assessed via CSF A $\beta_{42}$  except where lumbar puncture (LP) was medically contraindicated or refused by participants, in which case A $\beta$  PET was permitted as an alternative method of determination of A $\beta$  status. CSF samples were tested with the Meso Scale Discovery (MSD) triplex (A $\beta_{38/40/42}$ ). A binary classification for A $\beta$  load was applied using a cut-off value for CSF A $\beta_{42} \leq 600$  ng/L. The cut-off for brain A $\beta$  PET via standardized uptake value ratio (SUVR) was based on three independent F18-radiolabeled amyloid tracers - florbetapir, flutemetamol, and florbetaben. A specific SUVR threshold (i.e. a cut-point) was used for each of the three radiotracers (Amyvid: 1.14 with whole-cerebellum as a reference region, Neuraceq: 1.20 with cerebellar grey matter, Vizamyl: 1.23 with whole cerebellum). Scans were reported as amyloid positive if the composite cortical SUVR value was above the defined tracer-specific threshold, and negative if less than or equal to the threshold value.

All study investigators, sponsor team and participants are blinded as to A $\beta$  status information, with the exception of an unblinded team member for verification of imaging and CSF A $\beta$  information. Blinding was put in place to avoid bias for conducting, monitoring and interpreting results from the clinical assessments (except for research analysis purposes). The same double-blind is maintained for apolipoprotein E (*APOE*) genotype, in view of allele-specific positive correlation with A $\beta$  load [13–15]. A $\beta$  status and *APOE* genotype results were

1  
2  
3 not disclosed to participants as the clinical value (i.e., diagnostic or predictive) of such a  
4 disclosure in a CN population is still unestablished. If clinical value is established from this or  
5 other studies, then amyloid and *APOE* genotype will be disclosed to participants, at the end of  
6 the study.  
7  
8  
9

10 Numbers of A $\beta$  negative participants who passed screening assessments were deliberately  
11 controlled to ensure equivalency with number of eligible A $\beta$  positive participants. There was  
12 no deliberate effort to balance the groups by age or gender.  
13  
14  
15

## 16 **Study schedule**

### 17 *Participant recruitment*

18  
19 At the ICL site, participants were recruited primarily from the CHARIOT Register, a well-  
20 established dementia prevention and prediction register of older adults without dementia who  
21 have provided consent to be contacted for relevant ageing research [16,17]. Some participants  
22 transitioned directly to CPSS from the Main study, though most of these individuals had  
23 previously been recruited also from the CHARIOT Register. Additional methods of  
24 recruitment at the site, with very limited numbers of enrolled participants, included self-  
25 referrals and response from media advertisements. At the Edinburgh site, participants were  
26 recruited via SHARE (<https://www.registerforshare.org>), Join Dementia Research (JDR,  
27 <https://www.joindementiaresearch.nihr.ac.uk/>) and the Scottish Primary Care Research  
28 Network (SPCRN [http://www.nhsresearchscotland.org.uk/research-areas/primary-care/about-](http://www.nhsresearchscotland.org.uk/research-areas/primary-care/about-the-network)  
29 [the-network](http://www.nhsresearchscotland.org.uk/research-areas/primary-care/about-the-network)) (See Figure 1 for the participant recruitment pathway).  
30  
31  
32  
33  
34  
35  
36  
37  
38  
39  
40

### 41 *Selection of study participants: summary of eligibility criteria*

42  
43 The major exclusion criteria for CPSS include known familial autosomal dominant AD,  
44 diagnosis of AD dementia, MCI, or any other degenerative brain disorder that is associated  
45 with dementia at screening. Evidence of brain disease or other conditions leading to dementia,  
46 other than AD-related structural pathologies were assessed centrally by blinded neuro-  
47 radiologists via magnetic resonance imaging (MRI) during screening. Additionally, use of AD  
48 pharmacological therapies, and evidence of psychiatric/cognitive disorders/other abnormalities  
49 such as low vitamin B12 (specifically those with abnormal homocysteine and methylmalonic  
50 acid), and linked to cognitive deficits are exclusionary. Further, history of first-degree family  
51 member with diagnosed clinical AD was required for participants aged 60-65 years. This  
52 measure was put in place to enrich the cohort for cerebral A $\beta$  positivity given typically lower  
53  
54  
55  
56  
57  
58  
59  
60

1  
2  
3 prevalence in asymptomatic young elders i.e. below 70 years of age [18], thereby effectively  
4 minimizing screen failure rates. Following participants' consent, self-reported medical and  
5 medication history was confirmed from full history provided by participants' general  
6 practitioner (GP). Upon receipt of any medical information, current medical conditions and  
7 past medical history was updated on source documents and subsequently on electronic data,  
8 including medication, past and planned procedures. Medical summaries from GPs were used  
9 to ascertain self-reported histories.

10  
11 During screening, participants whose cognitive performance on any RBANS Index fell more  
12 than 1.5 standard deviations below the (age- and education-adjusted) population mean (based  
13 on normative sample from [19])) were referred to an adjudication panel. This panel, comprised  
14 of neurologists, psychiatrists and neuropsychologists, considered whether the low performance  
15 was likely to be attributable to undiagnosed cognitive impairment and, if so, excluded the  
16 participant from the study. These participants were contacted directly by the study team to  
17 inform them of their exclusion. At that time, where any concerns were noted regarding their  
18 performance, the option to notify their GP with information about the study and their exclusion  
19 was offered.

### 20 21 *Screening schedule*

22  
23 The screening was usually completed in four separate visits within a 90-day window. On  
24 certain occasions, this timeline was extended up to 180 days to allow for treatment of transient  
25 conditions, laboratory retesting, and scheduling of other screening assessments. This allowed  
26 time for results to be received and evaluated against study eligibility criteria. Any clinically  
27 significant findings were passed on for follow-up to the participant's GP, and participants who  
28 were determined to have an active unstable illness as defined by the inclusion/exclusion  
29 criteria. Screening involved collection of demographic data which included age, ethnicity,  
30 education and occupational status. During screening, potential participants completed  
31 cognitive tests, the G-PACC and RBANS, and CDR including the study partner interview. A  
32 clinical evaluation (pulse, blood pressure, weight, head, waist & hip circumference,  
33 temperature (tympanic), physical and neurological examination) and clinical lab assessments  
34 were carried out to determine general health status. Participants not excluded at this stage then  
35 underwent a brain MRI. If MRI did not reveal exclusionary abnormalities (see Table 1), it was  
36 followed by an A $\beta$  assessment based on CSF analysis or brain PET scan. After the A $\beta$   
37 determination, baseline assessments were undertaken at two consecutive visits where the  
38  
39  
40  
41  
42  
43  
44  
45  
46  
47  
48  
49  
50  
51  
52  
53  
54  
55  
56  
57  
58  
59  
60

1  
2  
3 RBANS (form A), G-PACC (form A) as well as the Neuropsychological Assessment Battery  
4 (NAB) Memory and Executive Function modules (form 1) and the National Adult Reading  
5 Test (NART) were administered alongside self-reported study questionnaires. Bio-samples  
6 were further collected for biomarker assessments. (See Figure 3 for schematic depiction of  
7 screening and baseline assessments).  
8  
9

### 10 11 12 *Post-screening schedule*

13  
14  
15 Following the baseline assessment, CPSS participants were randomized in a balanced 1:1:1  
16 ratio, stratified by A $\beta$  status and level of performance on the screening RBANS, to one of three  
17 supplemental neuropsychological tests namely: CogState Brief Battery [20], Cognitive Drug  
18 Research Assessment System, and either Delis-Kaplan Executive Function System [DKEFS,  
19 21, ICL only] (ICL only) or COGNITO [22, EDI only]. Participants who enrolled in the  
20 Substudy from the Main Study retained their previous Main Study-assigned randomized group.  
21 Participants are expected to attend study visits every quarter and will be followed up for a  
22 period of up to 3.5 years.  
23  
24  
25  
26  
27  
28

### 29 **Study outcomes and assessments**

#### 30 31 *Primary neurocognitive outcomes*

32  
33  
34 The primary outcomes of the CPSS are performance in two neurocognitive measures, the novel  
35 G-PACC and the RBANS.  
36

37  
38 The G-PACC: is a retrospectively validated measure, weighted towards episodic memory but  
39 including a timed executive function test and a global cognitive screening test. For this study,  
40 the four PACC components include: the Free and Cued Selective Reminding Test -Immediate  
41 Recall [FCSRT-IR, 23,24], the Delayed Paragraph Recall score on a single administration of  
42 the Logical Memory story from the WMS – Revised [25], the WAIS-IV Coding subtest [26]  
43 and the MMSE [27]. Each component score is transformed into z-scores. These z-scores are  
44 summed to form the composite. The battery takes about 25 minutes to administer. Alongside  
45 screening and baseline time points, alternating forms of the G-PACC are administered at the  
46 following time points: Months 6, 12, 18, 24, 30, 36, 42.  
47  
48  
49  
50  
51  
52

53  
54 The RBANS: is a 25-minute composite battery with 12 subtests that measure 5 cognitive  
55 domain indices: Attention, composed of Digit Span and Coding, Language, with Picture  
56 Naming and Semantic Fluency subtests, Visuospatial Construction including Figure Copy and  
57 Line Orientation subtests, Immediate Memory comprising List Learning and Story Memory  
58  
59  
60



1  
2  
3 subtests, and Delayed Memory composed of List Recall, List Recognition, Story Recall, and  
4 Figure Recall subtests. The sum of these 5 Index scores is converted to a Total Scale value via  
5 a mapping table. The Total Scale is a norm-based t-score based on a distribution with a mean  
6 of 100 and standard deviation of 15. The RBANS is administered face-to-face, has 3 alternate  
7 forms, is available in over 30 languages, and has been used in multinational clinical trials  
8 including AD trials. Alternating forms of the RBANS are also administered at the following  
9 timepoints: Months 3, 9, 15, 21, 27, 33, 39. During screening, participants' RBANS scores  
10 were used to delineate risk (low, medium, high) for developing MCI-AD, as described in the  
11 Main study [11].

12  
13  
14  
15  
16  
17  
18  
19  
20  
21  
22  
23  
24  
25  
26  
27  
28  
29  
30  
31  
32  
33  
34  
35  
36  
37  
38  
39  
40  
41  
42  
43  
44  
45  
46  
47  
48  
49  
50  
51  
52  
53  
54  
55  
56  
57  
58  
59  
60

Secondary Cognitive outcomes and Functional outcomes are described in Table 2. More  
detailed description of these measures are provided in the CHARIOT PRO Main Study  
Protocol [11].

### *Neuroimaging outcomes*

Safety and volumetric scans (3DT1, FLAIR, T2\*, PD/T2, T1 and DWI): All potential CPSS  
participants underwent brain MRI at screening to assess eligibility, based on a central  
radiologist's interpretation of the MRI scan under the supervision of Bioclinica Inc. Borderline  
findings were reviewed by the Medical Monitor prior to determining participant eligibility.  
Image acquisition was performed at multiple sites based on a standardized MRI protocol.  
General Electric Signa HDxt 1.5T and Siemens TrioTim, Verio, Skyra and Prisma 3T scanners  
were used to acquire a volumetric 3D T1 weighted series in a sagittal plane, using 1.2 mm thick  
slices and a 192x192 acquisition matrix over a square FOV of 240 mm. Contrast parameters  
were field-strength and manufacturer dependent (Siemens MP-RAGE and GE IR-Prep Fast  
SPGR). The standardized MRI protocol also included 2D axial FLAIR, T2\* gradient echo,  
dual-echo proton-density and T2-weighted turbo/fast spin echo, T1-weighted turbo/fast spin  
echo and diffusion-weighted imaging. Proper implementation of the MRI protocol on each  
participating scanner was verified prior to first subject scan by use of American College of  
Radiology (ACR) phantom scans.

Exploratory scans (Task-free BOLD functional MRI (tf-fMRI) and high-resolution coronal  
T2sequences): At the ICL site, the first 800 subjects who were eligible for MRI underwent a  
dual-echo GRE field map and task-free functional MRI time series. For the remainder of the  
subjects, a high-resolution 2D coronal T2-weighted sequence was acquired, in order to  
visualize hippocampal subfields.

1  
2  
3 A $\beta$  PET: At final stage of screening, evidence of A $\beta$  pathology in potential CPSS participants  
4 was assessed by a brain PET scan. All images derived were evaluated centrally at Bioclinica  
5 Inc. for A $\beta$  status assessment. The assessments were performed by neuro-radiologists trained  
6 in the assessment of A $\beta$  PET scans using F18-radiolabeled amyloid tracers (Amyvid, Vizamyl  
7 and Neuraceq) for amyloid status according to the reading process developed by radiotracer  
8 vendors. The PET scan was evaluated at baseline to determine each patient's A $\beta$  status as  
9 positive or negative and therefore inclusion or exclusion into the trial. PET exams were  
10 acquired using a uniform scanning protocol that minimizes and accounts for between-site  
11 differences in PET systems, as characterized with a Hoffman phantom exam. All exams were  
12 acquired in 3D mode and employed correction for attenuation, scatter and random coincidence.  
13 Semi-quantitative SUVR assessment was performed prior to the visual read. SUVR  
14 calculations leveraged a FreeSurfer-based native-space MRI segmentation method. The A $\beta$   
15 status assessment was a hybrid visual and quantitative approach (see Figure 2). A visual review  
16 was performed by a single reader, followed by positivity assignment based on SUVR cutpoint.  
17 In case of discrepancies between visual and SUVR results, a second reader was asked to  
18 participate in a final decision on amyloid status, as part of a consensus review. The second  
19 reader was given both the initial visual read and the SUVR measurement and convened with  
20 the first reader to arrive at a consensus assessment.

### 34 ***Fluid Biomarkers***

35  
36  
37 Blood, saliva and urine samples for clinical assessments and future biomarker discovery  
38 studies: At ICL and EDI, blood and urine samples were collected at screening to assess general  
39 health status. These included: Haematology and Differential Panel, Lipid Panel, Chemistry  
40 Panel, Electrolyte Panel, Coagulation Group, C-Reactive Protein, TSH, Folate, Vitamin B12  
41 and Urine Macro Panel (with Urine Microscopy if abnormal Macro Panel).

42  
43  
44  
45  
46 At ICL, serum, plasma, buffy coat, whole blood, urine and saliva samples are processed and  
47 stored at baseline and annually thereafter for future biomarker exploration. Samples for  
48 biobanking are collected between 9-11.30am and following an overnight fast; and are stored at  
49 the ICL purpose-built -80°C biobank for future analyses. All samples are processed within two  
50 hours of collection, as per guidelines on biomarker pre-processing [28]. Planned analyses  
51 include untargeted metabolite and proteome profiling, to generate novel targets for future  
52 hypothesis-testing and biomarker discovery studies.

1  
2  
3 CSF biomarkers: For those participants not receiving A $\beta$  PET, CSF samples were collected  
4 during screening and analyses for AD-related markers including beta-amyloid, total tau and  
5 phosphorylated tau. The A $\beta$  data was used for determination of enrolment eligibility, and in  
6 addition to the tau data, will be useful for disease modelling and staging of pre-clinical AD per  
7 NIA-AA criteria [2]. At ICL, additional aliquots of CSF samples are stored in the -80°C  
8 biobank for future analyses.  
9

10  
11  
12  
13  
14 Genetic outcomes: Whole blood is collected in EDTA tubes for extraction of genomic DNA  
15 (gDNA) using standard methods. gDNA were thus isolated via commercially available kit  
16 following manufacturer instructions (QIAGEN QIAasympphony DSP DNA Mini Kits or Promega  
17 Maxwell RSC Whole Blood DNA Kit). Both kits facilitate automated magnetic bead-based  
18 extractions that successfully extract DNA from Human Whole Blood samples with good  
19 quantitation and purity assessments. The QPS validated pyrosequencing genotyping assays for  
20 *APOE* codon 112T>C and codon 158C>T polymorphic variants were used to genotype  
21 participant's gDNA samples and identify *APOE*  $\epsilon$ 4 Carriers and *APOE*  $\epsilon$ 4 Non-Carriers status.  
22 By interrogating these two polymorphic variants, we identified the three *APOE* alleles: *APOE*  
23  $\epsilon$ 2(TGC 112, TGC 158), *APOE*  $\epsilon$ 3 (TGC 112, CGC 158), and *APOE*  $\epsilon$ 4 (CGC 112, CGC 158).  
24 *APOE* genotype status has been determined for the enrolled cohort. A genome-wide-analysis  
25 study is under-way and data expected to be available during the study. At ICL, whole blood is  
26 also collected in a PAXgene® Blood RNA tube containing reagent for stabilization of  
27 intracellular RNA, and stored -80°C. These samples will be used for future genetic analyses.  
28  
29  
30  
31  
32  
33  
34  
35  
36  
37  
38

### 39 ***Medical History and Clinical examinations (Physical and neurological examination)***

40  
41 A thorough medical history was obtained including an evaluation of all body systems (ENT,  
42 ophthalmic, musculoskeletal, gastrointestinal, urinary, respiratory, renal, cardiovascular,  
43 dermatological) with an emphasis on relevant medical history (e.g. neurological, psychiatric,  
44 substance abuse, endocrine and metabolic). Safety and compatibility for neuroimaging were  
45 further ensured prior to the procedure.  
46  
47  
48  
49

50  
51 Clinical examination included General Physical examination and a separate comprehensive  
52 Neurological Physical examination. The General Physical examination assessment included:  
53 General appearance, Dermatologic (including Mucous Membranes), Ear, nose, throat (ENT),  
54 Cardiovascular, Respiratory, Abdomen, Lymph Nodes, Musculoskeletal and any other  
55 findings. At Neurological Examination, Mental status, Cranial nerves, Motor (strength), Tone,  
56 Involuntary movements, Coordination (Finger-nose, Gait, Postural reflexes and Heel to shin),  
57  
58  
59  
60

1  
2  
3 Sensation (Proprioception, Cold, Light touch), Deep tendon reflexes, Plantar reflexes and  
4 presence of other neurological signs (e.g. tremor) were assessed.  
5  
6

### 7 ***Safety reporting***

8  
9 During the whole course of the study, new medical conditions and changes in medication were  
10 assessed at every site visit. All adverse events (serious and non-serious) were documented and  
11 reported according to the same protocol procedures applied in the main CHARIOT:PRO Main  
12 Study [11].  
13  
14  
15

### 16 **Study participant and public involvement**

17  
18 The ICL (via CHARIOT register) and EDI team have established Research volunteer panels  
19 consisting of lay members who met on an ad-hoc basis to support study development during  
20 the planning stage. These panels provided feedback on study design, procedures and  
21 dissemination for lay audiences. A newsletter is provided to study participants with updates  
22 regarding recruitment, study milestones and any important changes to the Protocol.  
23  
24  
25  
26  
27

28 CPSS participants further provide feedback on the experience of research participation at the  
29 different study visits, to ensure that their perspectives are represented in decision-making about  
30 the future of the project and to advise on planned study activities, including dissemination  
31 plans. Annual participant seminars are conducted for dissemination of study results and  
32 discussion of future plans. A newsletter is provided to study participants quarterly for study  
33 updates, as well as future plans. Participant input and feedback on volunteer experiences is  
34 typically encouraged for inclusion in the newsletter.  
35  
36  
37  
38  
39  
40

### 41 **Ethical and regulatory considerations**

42  
43 To ensure the quality and integrity of research, CPSS is conducted in accordance with GCP  
44 Guidelines, GPPs issued by ISPE, applicable national guidelines, and to the Declaration of  
45 Helsinki 2013, as modified by the 52nd World Medical Assembly (WMA), Edinburgh,  
46 Scotland, 2000, and clarified by the WMA General Assembly, Washington 2002 and Tokyo  
47 2004. The study has received approval from the National Research Ethics Service (NRES)  
48 Committee London Central (reference 15/LO/0711 [IRAS 140764]), as well as independent  
49 ethics review by committees from the local sites.  
50  
51  
52  
53  
54  
55

56 Informed consent: Formal informed consent is taken using an informed consent form (ICF)  
57 from both participant and study partners before participation in the study. Given the possibility  
58 that participants might lose mental capacity during the study; it was recommended at the outset  
59  
60

1  
2  
3 of participation that the participant identified a Legally Authorized Representative (LAR). A  
4 LAR may include the spouse, a person specifically appointed to take care of the legal interests  
5 of the participant, an individual with guardianship, and a health care proxy, who provides  
6 consenting for research studies which is within the legal scope of the proxy's delegated  
7 responsibilities (according to local applicable laws). The LAR must have the cognitive and  
8 mental capacities (as determined by the site Investigator) enabling him/her to understand the  
9 procedures, risks, and benefits involved with the study. The consent was given, and the form  
10 signed, at the initial visit or at follow-up visits at the study sites, based on the choice of the  
11 participant, and, where necessitated, on the choice of the LAR.  
12  
13  
14  
15  
16  
17  
18

19 Duty of care: As part of the duty of care during the study, all clinically relevant information is  
20 shared with study participants where relevant and, with participant's consent, communicated  
21 to the GP for medical follow-up. The clinically relevant findings shared included systemic  
22 hypertension and significant changes in cognitive assessments where the investigator felt they  
23 were relevant.  
24  
25  
26  
27  
28

29 Confidentiality: Participant confidentiality is strictly maintained. Each participant is assigned  
30 a unique participant identifier upon study enrolment, which is used for all subsequent data  
31 analysis and reporting. Participants' National Health Service (NHS) numbers are collected and  
32 stored in keeping with industry standards for encryption/data protection, allowing for  
33 subsequent data collection from electronic health records in primary or secondary care within  
34 NHS. This data collection only occurs following NRES approval. All parties ensure that  
35 participant personal data is not included on any study forms, reports, publications, or in any  
36 other disclosures, except where required by law. The Investigators in compliance with Federal  
37 regulations, other applicable laws and International Conference on Harmonization (ICH) GCP  
38 Guidelines keep documents that are not for submission to the Sponsor and/or its designee (e.g,  
39 signed ICFs and Participant Information Sheets) in strict confidence. In accordance with  
40 regulations in the UK, participants are informed about data handling procedures.  
41  
42  
43  
44  
45  
46  
47  
48  
49

### 50 **Data management, analysis, and dissemination plans**

51  
52 **Data Management:** The SubStudy is conducted in accordance with Good Clinical Practice  
53 (GCP) Guidelines as such data is recorded and stored in a way that could be verified and  
54 reported in an accurate manner. All essential documents are filed in the Trial Master  
55 File/Investigator Site File. Source documents are kept in both paper and electronic formats.  
56 The main Electronic Data Capture system used in the current study is Medidata Rave. Both  
57  
58  
59  
60

1  
2  
3 paper and electronic data are subject to daily and monthly internal audits based on Standard  
4 Operating Procedures (SOPs). In addition, the Investigator Site Files, paper source  
5 documentation and electronic source data are routinely monitored to maintain data accuracy  
6 collection to the highest degree.  
7  
8  
9

10 **Statistical Analysis:** Assuming the 3.5-year change from baseline in the G-PACC score has a  
11 standard deviation of 2.4 for the A $\beta$  positive participants (Donohue et al., 2014), a sample size  
12 of n = 250 with a 3.5-year dropout rate of 31% (i.e., 10%/year) ensures the 95% confidence  
13 interval (CI) for the 3.5-year mean change in G-PACC score in A $\beta$  positive participants to be  
14 no wider than 0.72, assuming that the sample mean follows a Gaussian distribution. Analysis  
15 of change in G-PACC and RBANS over time will be performed with mixed models for  
16 repeated measures (MMRM) which assumes that missing data due to dropout are missing-at-  
17 random (MAR). The robustness of the analysis with respect to deviations from the MAR  
18 assumption will be evaluated. Analyses of the accruing results may be performed periodically  
19 while the study is ongoing. Analyses will generally be descriptive, but inferential analyses  
20 might be performed as needed. Potential unblinded interim analyses include:  
21  
22  
23  
24  
25  
26  
27  
28  
29

30 (i) Analyses for baseline characterization of participants.

31 (ii) Analyses for determining longitudinal change in study endpoints once the last ongoing  
32 subject completes the Month 12, Month 24, and Month 36 visits.

33 These analyses will include descriptive statistics (n, mean, standard deviation) and/or  
34 proportions for the A $\beta$  positive and negative groups, but the A $\beta$  status of individual participants  
35 will remain blinded.  
36  
37  
38  
39  
40

41 **Dissemination plan:** Findings will be disseminated to several target audiences, including the  
42 scientific community, research participants, patient community, public, industry, regulatory  
43 authorities, and policymakers. Study results will be communicated via scientific publications  
44 and conference presentations, guided by the Uniform Requirements for Manuscripts Submitted  
45 to Biomedical Journals: Writing and Editing for Biomedical Publication of the International  
46 Committee of Medical Journal Editors (ICMJE). Press releases, interviews and other media  
47 communications (including social media) will also serve as a medium for disseminating study  
48 findings and research plans.  
49  
50  
51  
52  
53  
54  
55  
56  
57

## 58 DISCUSSION

59  
60

1  
2  
3 With the pre-clinical disease stages being increasingly recognized as the best timing for  
4 intervention, it is paramount that trial evaluations are sensitive enough to detect and track  
5 cognitive, functional and biological changes emerging in these stages while also  
6 possessing sufficient efficacy to detect therapeutic effects for drug trials. Furthermore, there is  
7 an urgency to identify robust and sensitive predictors of clinical progression in order to estimate  
8 individual risks for clinical AD and develop and apply therapeutic strategies prior to emergence  
9 of clinically evident AD dementia.  
10  
11  
12  
13  
14  
15  
16

17 The CHARIOT:PRO SubStudy (CPSS) contributes towards this global agenda of AD-  
18 dementia prevention. The study features detailed and frequent clinical and cognitive  
19 assessments in a deeply phenotyped, presymptomatic cohort of older adults. An overall aim of  
20 the study is to prospectively compare changes in cognition, and other clinical measures,  
21 between individuals with presence of pathological levels of brain A $\beta$  detected in PET scans or  
22 CSF and those without such evidence. CPSS also introduces a novel cognitive composite, the  
23 G-PACC, as a possible endpoint for future clinical trials. In this way, CPSS will expand upon  
24 prior retrospective investigations of proposed cognitive composites [29], by prospectively  
25 investigating the longitudinal change of the components of the G-PACC composite. The  
26 performance of the G-PACC to detect effects will be compared against another cognitive  
27 composite and its component measures, the RBANS. The addition of the RBANS component  
28 measures, alongside other clinical data, will allow for the exploration of novel cognitive risk  
29 profiles for the progression of future AD. The baseline data will determine which measures are  
30 most sensitive for predicting longitudinal AD-related cognitive decline, informing future  
31 screening methods for clinical trials. The study includes both patient and proxy-versions of  
32 functional interviews, such as the CFI and ADCS-ADL, to investigate longitudinal changes in  
33 everyday functioning in preclinical-AD individuals alongside cognitive decline and clinical  
34 characteristics. Dietary patterns and other lifestyle variables will also be assessed to consider  
35 the impact of environmental exposures on AD development. Therefore, the CPSS will also  
36 allow for the exploration of environmental and lifestyle predictors of cognitive decline and  
37 impairment.  
38  
39  
40  
41  
42  
43  
44  
45  
46  
47  
48  
49  
50  
51  
52  
53

54 The uniqueness of this study lies in its breadth and frequency (every 3 months) of assessments,  
55 as well as the planned explorations and comparisons of proposed cognitive composites for AD  
56 detection and tracking. The prolonged and detailed follow-up data offers opportunities for  
57 precise disease modelling and the evaluation of several methodological controversies within  
58  
59  
60

1  
2  
3 clinical trial design, such as the influence of practice effects on cognitive performance, in  
4 addition to mechanisms of reserve and resilience against cognitive senescence. To date, CPSS  
5 has successfully completed its enrolment of 519 participants across two UK research sites, from  
6 2,451 screened volunteers. Next steps in CPSS's milestones include the exploration of the  
7 baseline data for initial comparative analyses between stratified participant groups. The  
8 CHARIOT:PRO SubStudy will continue as a multinational and multidisciplinary collaboration  
9 between industry, academia and the NHS to promote greater understanding of the etiology of  
10 AD pathological attributes and symptom development, and champion the search for effective  
11 preventative therapies. Future plans include study extension to at least 4.5 years, at the ICL  
12 site, with addition of Tau-PET and follow-up structural MRI, and extensive state-of-art fluid  
13 biomarker discovery explorations at multiple timepoints.  
14  
15  
16  
17  
18  
19  
20  
21  
22  
23  
24

## 25 **Acknowledgments**

26  
27 The authors wish to thank the participants who continue to volunteer their time and  
28 commitment towards the SubStudy. We thank the staff at various sites who assist in the  
29 collection of biological, cognitive and other clinical data, and we thank the Sponsor for funding  
30 this work. Imperial College London is grateful for support from the NIHR NW London Applied  
31 Research Collaboration.  
32  
33  
34  
35  
36  
37  
38

## 39 **References**

- 40  
41 1 Alzheimer's Disease International. World Alzheimer's Report 2019 Attitudes to  
42 Dementia. 2019. <https://www.alz.co.uk/research/WorldAlzheimerReport2019.pdf>  
43  
44  
45 2 Jack CRJ, Bennett DA, Blennow K, *et al.* NIA-AA Research Framework: Toward a  
46 biological definition of Alzheimer's disease. *Alzheimers Dement* 2018;**14**:535–62.  
47 doi:10.1016/j.jalz.2018.02.018  
48  
49  
50  
51 3 Papp K V, Buckley R, Mormino E, *et al.* Clinical meaningfulness of subtle cognitive  
52 decline on longitudinal testing in preclinical AD. *Alzheimer's Dement* Published  
53 Online First: 2019. doi:<https://doi.org/10.1016/j.jalz.2019.09.074>  
54  
55  
56  
57 4 Sperling RA, Aisen PS, Beckett LA, *et al.* Toward defining the preclinical stages of  
58 Alzheimer's disease: Recommendations from the National Institute on Aging-  
59  
60



- 1  
2  
3 Alzheimer's Association workgroups on diagnostic guidelines for Alzheimer's disease.  
4 *Alzheimer's Dement* Published Online First: 2011. doi:10.1016/j.jalz.2011.03.003  
5  
6  
7 5 Dubois B, Hampel H, Feldman HH, *et al.* Preclinical Alzheimer's disease: Definition,  
8 natural history, and diagnostic criteria. *Alzheimer's Dement*. 2016.  
9 doi:10.1016/j.jalz.2016.02.002  
10  
11  
12  
13 6 Jansen WJ, Ossenkuppele R, Knol DL, *et al.* Prevalence of cerebral amyloid pathology  
14 in persons without dementia: a meta-analysis. *JAMA* 2015;**313**:1924–38.  
15 doi:10.1001/jama.2015.4668  
16  
17  
18  
19 7 Jack CRJ, Wiste HJ, Weigand SD, *et al.* Age-specific and sex-specific prevalence of  
20 cerebral beta-amyloidosis, tauopathy, and neurodegeneration in cognitively  
21 unimpaired individuals aged 50-95 years: a cross-sectional study. *Lancet Neurol*  
22 2017;**16**:435–44. doi:10.1016/S1474-4422(17)30077-7  
23  
24  
25  
26  
27 8 Morris JC, Roe CM, Grant EA, *et al.* Pittsburgh compound B imaging and prediction  
28 of progression from cognitive normality to symptomatic Alzheimer disease. *Arch*  
29 *Neurol* 2009;**66**:1469–75. doi:10.1001/archneurol.2009.269  
30  
31  
32  
33 9 Doraiswamy PM, Sperling RA, Coleman RE, *et al.* Amyloid-beta assessed by  
34 florbetapir F 18 PET and 18-month cognitive decline: a multicenter study. *Neurology*  
35 2012;**79**:1636–44. doi:10.1212/WNL.0b013e3182661f74  
36  
37  
38  
39 10 Kawas CH, Greenia DE, Bullain SS, *et al.* Amyloid imaging and cognitive decline in  
40 nondemented oldest-old: the 90+ Study. *Alzheimers Dement* 2013;**9**:199–203.  
41 doi:10.1016/j.jalz.2012.06.005  
42  
43  
44  
45 11 Udeh-Momoh C, Price G, Ropacki MT, *et al.* Prospective Evaluation of Cognitive  
46 Health and Related Factors in Elderly at Risk for Developing Alzheimer's Dementia:  
47 A Longitudinal Cohort Study. *J Prev Alzheimer's Dis* 2019;**6**:256–66.  
48 doi:10.14283/jpad.2019.31  
49  
50  
51  
52 12 Randolph C, Tierney MC, Mohr E, *et al.* The Repeatable Battery for the Assessment of  
53 Neuropsychological Status (RBANS): preliminary clinical validity. *J Clin Exp*  
54 *Neuropsychol* 1998;**20**:310–9. doi:10.1076/jcen.20.3.310.823  
55  
56  
57  
58 13 Beffert U, Cohn JS, Petit-Turcotte C, *et al.* Apolipoprotein E and  $\beta$ -amyloid levels in  
59 the hippocampus and frontal cortex of Alzheimer's disease subjects are disease-related  
60

- 1  
2  
3 and apolipoprotein E genotype dependent. *Brain Res* 1999;**843**:87–94.  
4 doi:[https://doi.org/10.1016/S0006-8993\(99\)01894-6](https://doi.org/10.1016/S0006-8993(99)01894-6)  
5  
6  
7  
8 14 Nalbantoglu J, Gilfix BM, Bertrand P, *et al.* Predictive value of apolipoprotein E  
9 genotyping in Alzheimer's disease: Results of an autopsy series and an analysis of  
10 several combined studies. *Ann Neurol* 1994;**36**:889–95. doi:10.1002/ana.410360614  
11  
12  
13 15 Yamazaki Y, Zhao N, Caulfield TR, *et al.* Apolipoprotein E and Alzheimer disease:  
14 pathobiology and targeting strategies. *Nat Rev Neurol* 2019;**15**:501–18.  
15 doi:10.1038/s41582-019-0228-7  
16  
17  
18 16 Wanis H. The CHARIOT Register: a primary care-based recruitment register for  
19 research into dementia and healthy ageing. *Br J Gen Pract* 2019;**69**:bjgp19X703601.  
20 doi:10.3399/bjgp19X703601  
21  
22  
23 17 Larsen M, Curry L, Mastellos N, *et al.* Development of the CHARIOT Research  
24 Register for the Prevention of Alzheimer's Dementia and Other Late Onset  
25 Neurodegenerative Diseases. *PLoS One* 2015;**10**. doi:10.1371/journal.pone.0141806  
26  
27  
28 18 Roberts RO, Aakre JA, Kremers WK, *et al.* Prevalence and Outcomes of Amyloid  
29 Positivity Among Persons Without Dementia in a Longitudinal, Population-Based  
30 Setting. *JAMA Neurol* 2018;**75**:970–9. doi:10.1001/jamaneurol.2018.0629  
31  
32  
33 19 Randolph C. *The RBANS manual*. San Antonio, TX: : The Psychological Corporation.  
34 1998.  
35  
36  
37 20 Hammers D, Spurgeon E, Ryan K, *et al.* Reliability of repeated cognitive assessment  
38 of dementia using a brief computerized battery. *Am J Alzheimers Dis Other Demen*  
39 2011;**26**:326–33. doi:10.1177/1533317511411907  
40  
41  
42 21 Delis DC, Kramer JH, Kaplan E, *et al.* Reliability and validity of the Delis-Kaplan  
43 Executive Function System: an update. *J. Int. Neuropsychol. Soc.* 2004;**10**:301–3.  
44 doi:10.1017/S1355617704102191  
45  
46  
47 22 Ritchie K, de Roquefeuil G, W RC, *et al.* COGNITO: Computerized Assessment of  
48 Information Processing. *J Psychol Psychother* 2014;**04**. doi:10.4172/2161-  
49 0487.1000136  
50  
51  
52 23 Ferris SH, Aisen PS, Cummings J, *et al.* ADCS Prevention Instrument Project:  
53 overview and initial results. *Alzheimer Dis Assoc Disord* 2006;**20**:S109-23.  
54  
55  
56  
57  
58  
59  
60

- 1  
2  
3 doi:10.1097/01.wad.0000213870.40300.21  
4  
5  
6 24 Grober E, Ocepek-Welikson K, Teresi JA. The Free and Cued Selective Reminding  
7 Test: evidence of psychometric adequacy. *Psychol Sci Q* 2009;**51**:266–82.  
8  
9  
10 25 Wechsler D. *Wechsler Memory Scale—Fourth Edition*. San Antonio, TX: : Pearson  
11 2009.  
12  
13  
14 26 Wechsler D. *Wechsler Adult Intelligence Scale—Fourth Edition*. San Antonio, TX: :  
15 Pearson. 2008.  
16  
17  
18 27 Folstein MF, Folstein SE, McHugh PR. ‘Mini-mental state’. A practical method for  
19 grading the cognitive state of patients for the clinician. *J Psychiatr Res* 1975;**12**:189–  
20 98. doi:10.1016/0022-3956(75)90026-6  
21  
22  
23  
24 28 O’Bryant SE, Gupta V, Henriksen K, *et al*. Guidelines for the standardization of  
25 preanalytic variables for blood-based biomarker studies in Alzheimer’s disease  
26 research. *Alzheimer’s Dement* 2015;**11**:549–60. doi:10.1016/j.jalz.2014.08.099  
27  
28  
29  
30 29 Donohue MC, Sperling RA, Salmon DP, *et al*. The preclinical Alzheimer cognitive  
31 composite: measuring amyloid-related decline. *JAMA Neurol* 2014;**71**:961–70.  
32 doi:10.1001/jamaneurol.2014.803  
33  
34  
35  
36 30 Nelson HE, Willison J. *The National Adult Reading Test (NART)*. Windsor: : NFER-  
37 Nelson 1991.  
38  
39  
40 31 Hughes CP, Berg L, Danziger WL, *et al*. A new clinical scale for the staging of  
41 dementia. *Br J Psychiatry* 1982;**140**:566–72. doi:10.1192/bjp.140.6.566  
42  
43  
44 32 Walsh SP, Raman R, Jones KB, *et al*. ADCS Prevention Instrument Project: the Mail-  
45 In Cognitive Function Screening Instrument (MCFSI). *Alzheimer Dis Assoc Disord*  
46 2006;**20**:S170-8. doi:10.1097/01.wad.0000213879.55547.57  
47  
48  
49  
50 33 Galasko D, Bennett DA, Sano M, *et al*. ADCS Prevention Instrument Project:  
51 assessment of instrumental activities of daily living for community-dwelling elderly  
52 individuals in dementia prevention clinical trials. *Alzheimer Dis Assoc Disord*  
53 2006;**20**:S152-69. doi:10.1097/01.wad.0000213873.25053.2b  
54  
55  
56  
57  
58  
59  
60

**Author Statement:**

Prof Middleton served as the ICL study site principal investigator. Prof Ritchie served as the EDI study site principal investigator. Dr. Udeh-Momoh served as the lead author, with Dr Watermeyer as co-lead. Drs. Udeh-Momoh, Kivipelto, Car, Perneczky, Price, de-Jager Loots and Ward were co-investigators at School of Public Health, Imperial College London. Dr Ritchie was co-investigator at Centre for Dementia Prevention, University of Edinburgh. All principal and co-investigators contributed to the study design, coordination, data acquisition, development and critical review of the manuscript. Dr. Scott and Mr Bracoud were employees at Bioclinica Inc., and developed the imaging protocol for the study, and participated in development and critical review of the manuscript. Prof Majeed co-developed the Chariot Register at School of Public Health, Imperial College London. Drs. Bassil, Robb, Cohn, Giannakopoulou, Kafetsouli, Chowdary and Ms Perera, Mclellan-Young, Lakey, Crispin and Curry were study investigators at School of Public Health, Imperial College London; Drs. Tamlyn Watermeyer and Natalia Reglinska-Matveyev were study investigators at Centre for Dementia Prevention, University of Edinburgh, and all contributed to data acquisition and review of the manuscript. Drs. Novak, Ropacki, Arrighi, Ketter, Raghavan, Saad and Brashear and Mr Fogle contributed to the study conception, protocol design, and development. Drs. Novak, Baker, Kacher, Saad and Mr Fogle contributed to study design and were responsible for data review, interpretation, and development of the manuscript. In addition, Dr. Arrighi was project pharmacoepidemiologist and Drs. Raghavan, Di and Kacher served as project biostatisticians, responsible for aspects of study design, statistical data analysis and statistical input. Dr Saad served as the unblinded statisticaian and imaging lead for the project.

All authors met ICMJE criteria and all those who fulfilled those criteria are listed as authors. All authors provided direction and comments on the manuscript, made the final decision about where to publish this protocol and approved the final draft and submission to this journal.

**Table 1: CHARIOT PRO study exclusionary findings post screening MRI**

- edema including amyloid-related imaging abnormalities (ARIA-E)
- hydrocephalus
- >25% age related white matter disease,
- frontal or temporal atrophy not typical of AD)
- history or evidence of a single prior hemorrhage >1 cm<sup>3</sup>
- multiple lacunar infarcts (2 or more) or
- single prior infarct >1 cm<sup>3</sup>
- cerebral contusion, encephalomalacia
- aneurysms, vascular malformations
- subdural hematoma
- space occupying lesions (eg, abscess or brain tumors such as meningioma >1cm)
- MRI features atypical of AD dementia.

\*Evidence of brain edema (eg, ARIA-E, vasogenic edema, hemosiderin deposits [HD] ≥10 mm in size or HD <10 mm in size but >10 in number) will be reviewed by the Sponsor's Medical Monitor to address plans for clinical evaluation and follow up as well as for potential inclusion/exclusion in the study.

**Table 2 CHARIOT PRO study Cognitive and Functional outcomes**

| Cognitive Outcome                                                               | Description                                                                                                                                                                                                                                                                                                                                                                                                                                                                                                | Assessment Schedule |
|---------------------------------------------------------------------------------|------------------------------------------------------------------------------------------------------------------------------------------------------------------------------------------------------------------------------------------------------------------------------------------------------------------------------------------------------------------------------------------------------------------------------------------------------------------------------------------------------------|---------------------|
| <i>Secondary outcomes</i>                                                       |                                                                                                                                                                                                                                                                                                                                                                                                                                                                                                            |                     |
| National Adult Reading Test (NART) [30]                                         | The NART is a word reading and pronunciation task comprising 50 English words with irregular grapheme-phoneme and stress rules. It is used to provide an estimate of premorbid intellectual functioning. Average administration time: 10 minutes.                                                                                                                                                                                                                                                          | BL                  |
| Neuropsychological Assessment Battery (NAB) Executive Function module (PAR Inc) | The executive function module comprises subtasks that examine planning, impulse control and psychomotor speed (through pen and paper mazes trials of increasing difficulty); judgement and decisional capacity (through questions pertaining to home safety, health and medical issues); concept formation, cognitive flexibility and response set (through a classification and categorization task) and fluency and generativity (through a word fluency task). Average administration time: 30 minutes. | M12, M24, M36       |

|                                                                                           |                                                                                                                                                                                                                                                                                                                                                                                                                                                                                                                                                                                                                                                                                                                                                                      |                                 |
|-------------------------------------------------------------------------------------------|----------------------------------------------------------------------------------------------------------------------------------------------------------------------------------------------------------------------------------------------------------------------------------------------------------------------------------------------------------------------------------------------------------------------------------------------------------------------------------------------------------------------------------------------------------------------------------------------------------------------------------------------------------------------------------------------------------------------------------------------------------------------|---------------------------------|
| Neuropsychological Assessment Battery (NAB) - Memory module (PAR, Inc)                    | The memory module comprises explicit learning, free recall, delayed recall and/or delayed recognition subtasks across verbal (list learning; story learning; medication instructions and name and address) and visual (shape learning) information. Average administration time: 45 minutes.                                                                                                                                                                                                                                                                                                                                                                                                                                                                         | M12, M24, M36                   |
| NEUROTRACK (Neurotrack Technologies, Inc)                                                 | Neurotrack is a declarative memory test based on digital eye tracking, administered on an IPAD. The task is a recognition memory test, relying on an individual's innate preference for novelty. In a familiarization phase, participants are presented with 2 identical images, side by side on the computer screen. This is followed by a test phase, in which a familiar image presented during the familiarization phase and a novel image are shown together. The ratio of time an individual gazes at the novel stimulus relative to the total viewing time constitutes a novelty preference score, with higher scores indicating superior declarative memory function and lower scores indicating impaired function. Average administration time: 10 minutes. | M3, M9, M15, M21, M27, M33, M39 |
| <i>Randomised tasks</i>                                                                   |                                                                                                                                                                                                                                                                                                                                                                                                                                                                                                                                                                                                                                                                                                                                                                      |                                 |
| Cognitive Drug Research Assessment System (CDRAS) (Bracket; United BioSource Corporation) | The CDRAS measures three domains of cognition: Attention (simple and choice reaction time, digit vigilance); Working memory (articulatory and spatial working memory); Episodic secondary memory (word recall, word recognition and picture recognition). Average administration time: 20 minutes.                                                                                                                                                                                                                                                                                                                                                                                                                                                                   | M3, M9, M15, M21, M27, M33, M39 |
| Cogstate (Cogstate, Inc)                                                                  | CogState consists of 4 tasks involving the presentation of playing cards. These tasks measure the functions of attention, processing speed, visual learning, and working memory using standard psychometric paradigms (ie, simple and choice reaction time, n-back and pattern separation learning). For the first assessment visit, M3, the task is administered twice within one session to control for task familiarity and practice effects. Average administration time: 15 minutes.                                                                                                                                                                                                                                                                            | M3, M9, M15, M21, M27, M33, M39 |

|                                                                              |                                                                                                                                                                                                                                                                                                                                                                                                                                                                                                                                                                                                                                                                                                                                                                                                                                                                                                                                                                                            |                                        |
|------------------------------------------------------------------------------|--------------------------------------------------------------------------------------------------------------------------------------------------------------------------------------------------------------------------------------------------------------------------------------------------------------------------------------------------------------------------------------------------------------------------------------------------------------------------------------------------------------------------------------------------------------------------------------------------------------------------------------------------------------------------------------------------------------------------------------------------------------------------------------------------------------------------------------------------------------------------------------------------------------------------------------------------------------------------------------------|----------------------------------------|
| <p>Delis-Kaplan Executive Function System (Pearson)</p> <p>ICL Site Only</p> | <p>The DKEFS is a paper and pencil measure of verbal and nonverbal executive functions and comprises 9 subtests. For this study, the Trail Making Test (visual attention and task switching) and Verbal Fluency (fluency and generativity) subtests are used. Total average administration time to complete these 2 subtests: 15 minutes.</p>                                                                                                                                                                                                                                                                                                                                                                                                                                                                                                                                                                                                                                              | <p>M3, M9, M15, M21, M27, M33, M39</p> |
| <p>Cognito [22]</p> <p>EDI Site Only</p>                                     | <p>COGNITO is a computerized task which assesses reaction time, primary and working memory (an articulation subtest further permitting identification of problems related to the articulatory loop), visuospatial and verbal secondary memory (with free, cued and multiple choice paradigms), implicit learning (priming), language skills (word and syntax comprehension, naming, verbal fluency), functional and semantic categorization of visual data (visual reasoning and form perception), focused and divided attention (visual and auditory modalities), and crystallized intelligence (vocabulary). Responses are made via a tactile screen which permits the recording of response latency (deducting reaction time provides an estimation of information processing time). Qualitative aspects of performance (perseveration, intrusions, visual field neglect) are also recorded. Administration time varies between 45- to 60-minute, depending on level of impairment.</p> | <p>M3, M9, M15, M21, M27, M33, M39</p> |
| <p><b>Functional Outcomes</b></p>                                            | <p><b>Description</b></p>                                                                                                                                                                                                                                                                                                                                                                                                                                                                                                                                                                                                                                                                                                                                                                                                                                                                                                                                                                  | <p><b>Assessment Schedule</b></p>      |
| <p>Clinical Dementia Rating Scale [31]</p>                                   | <p>The CDR is used as a clinical staging instrument and is administered to both participant and study partner, using a semi-structured format. It assesses six domains: memory; orientation; judgment and problem solving; involvement in community affairs; home and hobbies; and personal care. Average administration time: 15-20 minutes with the study partner and 10-15 minutes with the participant, depending on the severity of cognitive impairment.</p>                                                                                                                                                                                                                                                                                                                                                                                                                                                                                                                         | <p>M12, M24, M36</p>                   |



|                                                                                           |                                                                                                                                                                                                                                                                                                                                                                                                                                                                                                                                                                                                                                                    |                      |
|-------------------------------------------------------------------------------------------|----------------------------------------------------------------------------------------------------------------------------------------------------------------------------------------------------------------------------------------------------------------------------------------------------------------------------------------------------------------------------------------------------------------------------------------------------------------------------------------------------------------------------------------------------------------------------------------------------------------------------------------------------|----------------------|
| <p>Cognitive Function Index [32]</p>                                                      | <p>The CFI is a modified version of the Mail-in Cognitive Function Screening Instrument (MCFSI, Walsh et al, 2006) a self- and informant-reported subjective outcome measure regarding activities of daily living. It includes 14 questions that assess participants' perceived ability to perform high level tasks in daily-life and their sense of overall cognitive functional ability, indicating whether or not there has been a change in performance (yes/no/maybe) compared to 1 year ago. Study participants and their study partners independently rate the participant's level of ability. Average administration time: 10 minutes.</p> | <p>M12, M24, M36</p> |
| <p>Alzheimer's disease Cooperative Study ADL prevention instrument (ADCS-ADL-PI) [33]</p> | <p>The ADCS-ADL-PI includes 15 subjectively rated questions related to activities of daily living and 5 questions related to physical functioning. <b>Error! Reference source not found.</b> Study participants and their study partners independently rate the study participant's level of ability. Partners are additionally asked to evaluate whether activities were completed less often, required more time to complete, and if errors were made performing the task. Physical functioning items are rated as yes or no. Average administration time: 10 minutes.</p>                                                                       | <p>M12, M24, M36</p> |

Note: BL – Baseline



1  
2  
3  
4  
5  
6  
7  
8  
9  
10  
11  
12  
13  
14  
15  
16  
17  
18  
19  
20  
21  
22  
23  
24  
25  
26  
27  
28  
29  
30  
31  
32  
33  
34  
35  
36  
37  
38  
39  
40  
41  
42  
43  
44  
45  
46  
47

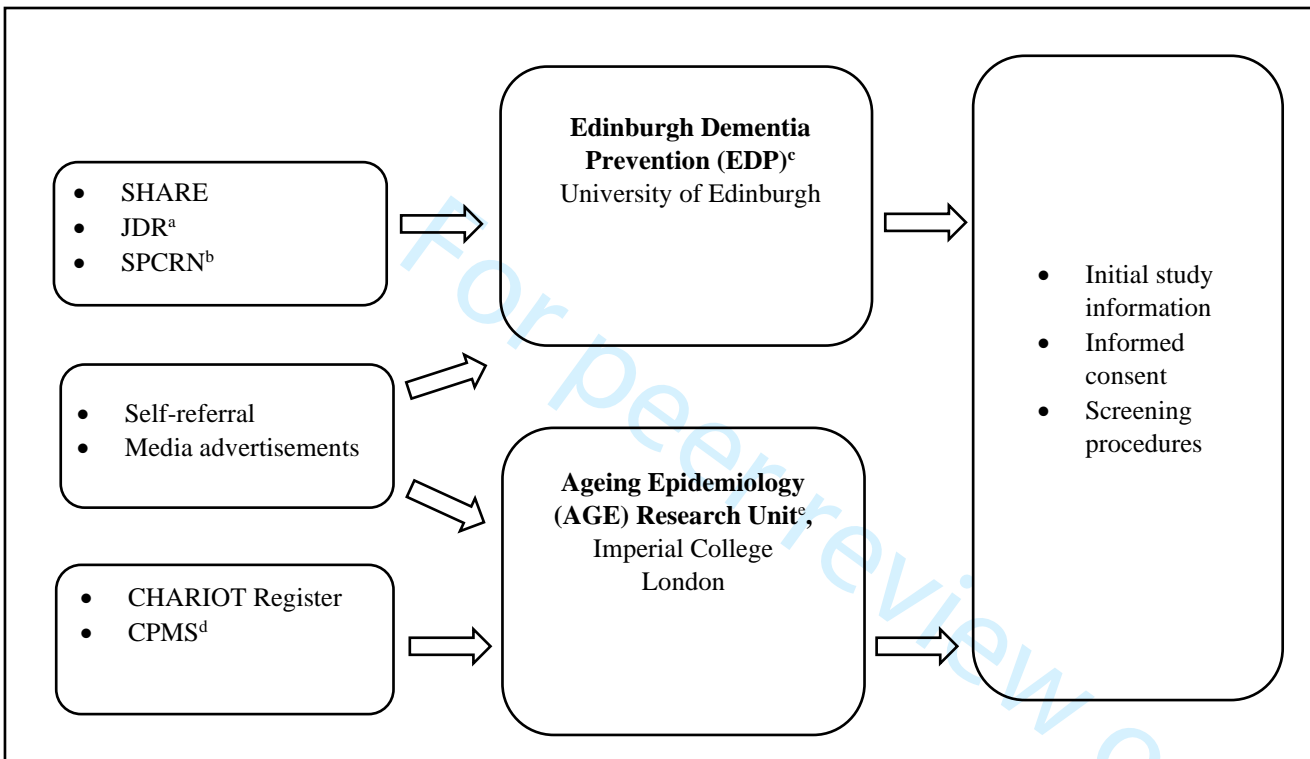

**Figure 1 The CHARIOT: PRO Substudy Recruitment pathway**

a. Join Dementia Research; b. Scottish Primary Care Research Network; c. formerly Centre for Dementia Prevention  
 d. CHARIOT:PRO Main Study, e. formerly Neuroepidemiology and Ageing (NEA) Research Unit

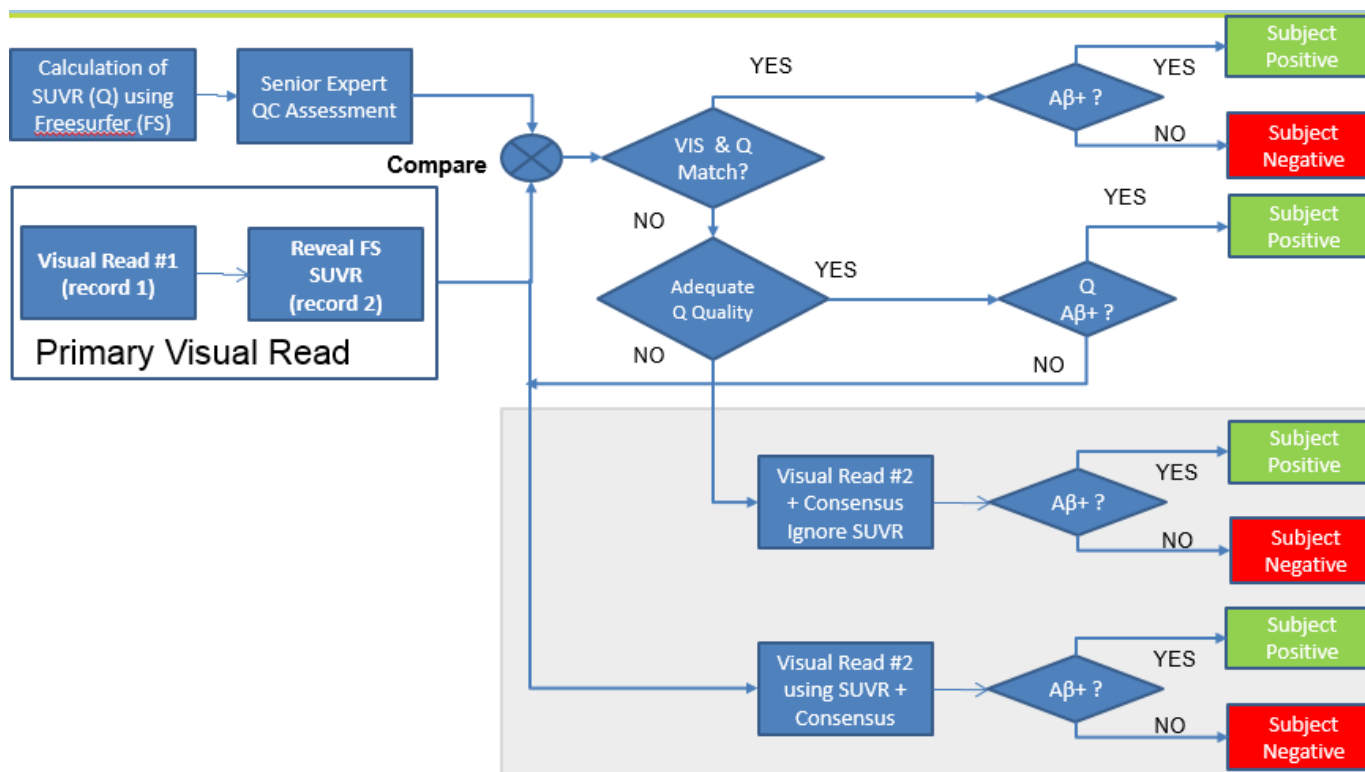

Figure 2: PET Aβ Status Reading Workflow

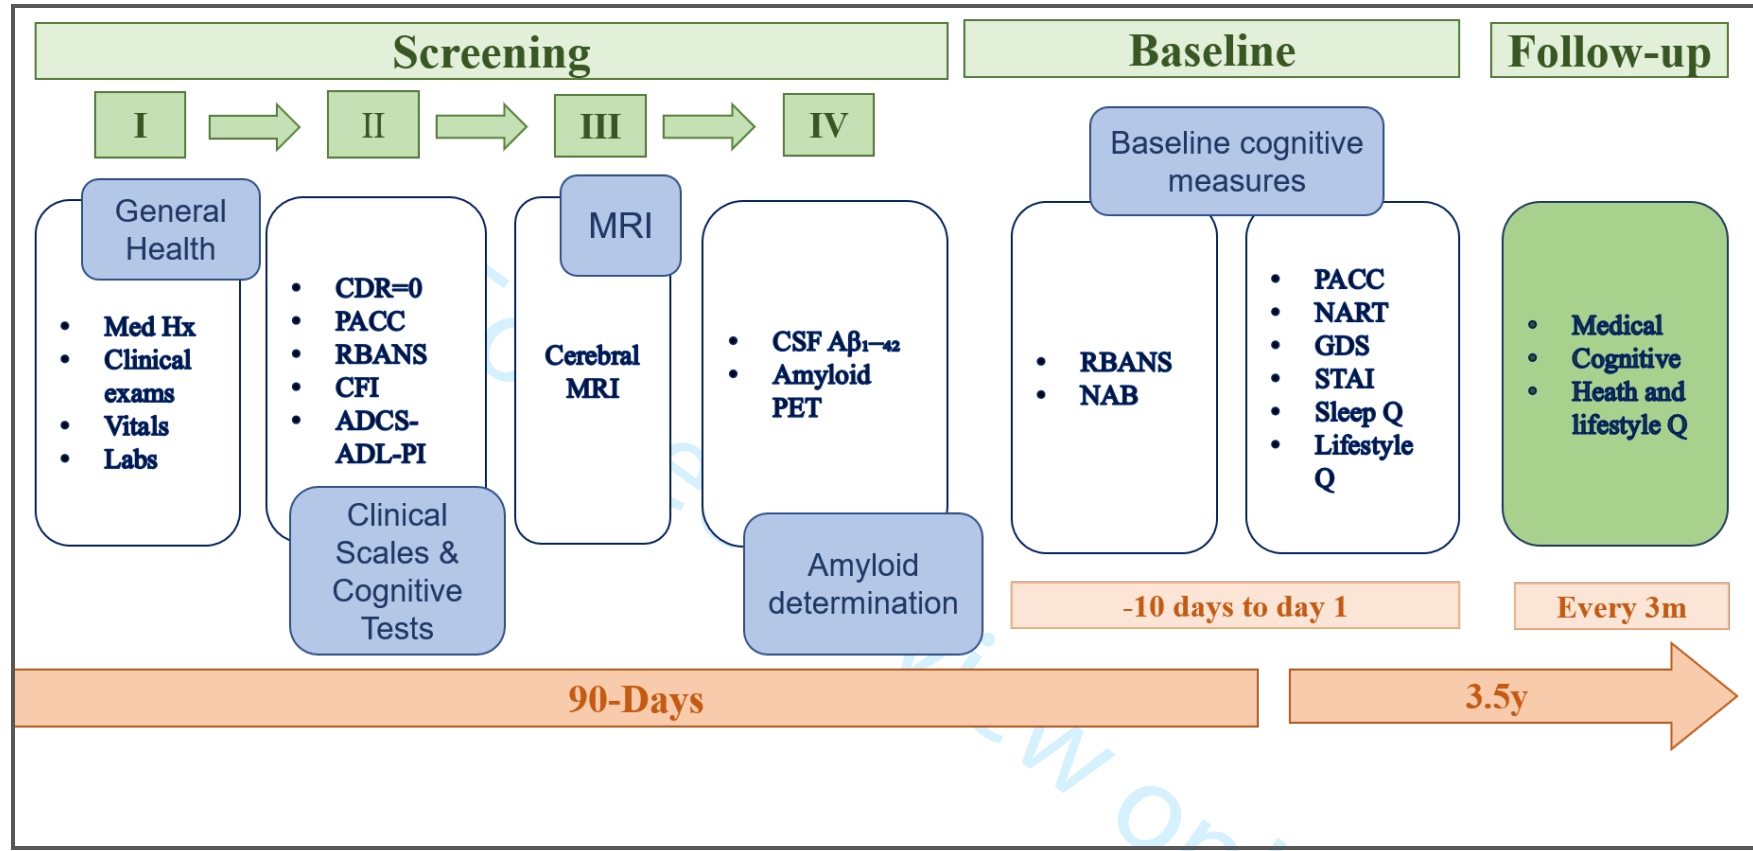

Figure 3 Screening and baseline assessment schedule

CDR=Clinical Dementia Rating; CSF=cerebrospinal fluid; MRI=magnetic resonance imaging; PACC=Preclinical Alzheimer Cognitive Composite; PET=positron emission tomography; RBANS=Repeatable Battery for the Assessment of Neuropsychological Status; CFI=Cognitive Function Index; ADCS-ADL-PI=ADCS-Activities of Daily Living - Prevention Instrument; NAB=Neuropsychological Assessment Battery; NART-National Adult Reading Test; GDS=Geriatric Depression Scale; STAI –State Trait Anxiety Inventory

# BMJ Open

## Protocol of The Cognitive Health in Ageing Register: Investigational, Observational and Trial Studies in Dementia Research (CHARIOT): Prospective Readiness cOhort (PRO) SubStudy

|                               |                                                                                                                                                                                                                                                                                                                                                                                                                                                                                                                                                                                                                                                                                                                                                                                                                                                                                                                                                                                                                                                                                                                                                                                                                                                                                                                                                                                                                                                                                                                                                                                                                                                                                                                                                                                                                                                                                                                                                                                                                                                                                                                                       |
|-------------------------------|---------------------------------------------------------------------------------------------------------------------------------------------------------------------------------------------------------------------------------------------------------------------------------------------------------------------------------------------------------------------------------------------------------------------------------------------------------------------------------------------------------------------------------------------------------------------------------------------------------------------------------------------------------------------------------------------------------------------------------------------------------------------------------------------------------------------------------------------------------------------------------------------------------------------------------------------------------------------------------------------------------------------------------------------------------------------------------------------------------------------------------------------------------------------------------------------------------------------------------------------------------------------------------------------------------------------------------------------------------------------------------------------------------------------------------------------------------------------------------------------------------------------------------------------------------------------------------------------------------------------------------------------------------------------------------------------------------------------------------------------------------------------------------------------------------------------------------------------------------------------------------------------------------------------------------------------------------------------------------------------------------------------------------------------------------------------------------------------------------------------------------------|
| Journal:                      | <i>BMJ Open</i>                                                                                                                                                                                                                                                                                                                                                                                                                                                                                                                                                                                                                                                                                                                                                                                                                                                                                                                                                                                                                                                                                                                                                                                                                                                                                                                                                                                                                                                                                                                                                                                                                                                                                                                                                                                                                                                                                                                                                                                                                                                                                                                       |
| Manuscript ID                 | bmjopen-2020-043114.R1                                                                                                                                                                                                                                                                                                                                                                                                                                                                                                                                                                                                                                                                                                                                                                                                                                                                                                                                                                                                                                                                                                                                                                                                                                                                                                                                                                                                                                                                                                                                                                                                                                                                                                                                                                                                                                                                                                                                                                                                                                                                                                                |
| Article Type:                 | Protocol                                                                                                                                                                                                                                                                                                                                                                                                                                                                                                                                                                                                                                                                                                                                                                                                                                                                                                                                                                                                                                                                                                                                                                                                                                                                                                                                                                                                                                                                                                                                                                                                                                                                                                                                                                                                                                                                                                                                                                                                                                                                                                                              |
| Date Submitted by the Author: | 08-Apr-2021                                                                                                                                                                                                                                                                                                                                                                                                                                                                                                                                                                                                                                                                                                                                                                                                                                                                                                                                                                                                                                                                                                                                                                                                                                                                                                                                                                                                                                                                                                                                                                                                                                                                                                                                                                                                                                                                                                                                                                                                                                                                                                                           |
| Complete List of Authors:     | <p>Udeh-Momoh, Chinedu ; Imperial College London, Ageing Epidemiology Research Unit, School of Public Health; University of Bristol, Translational Health Sciences, Bristol Medical School<br/>Watermeyer, Tamlyn; Northumbria University; The University of Edinburgh, Edinburgh Dementia Prevention, Centre for Clinical Brain Sciences<br/>Price, Geraint; Imperial College London, Ageing Epidemiology Research Unit, School of Public Health<br/>de-Jaegar Loots, Celeste; Imperial College London, Ageing Epidemiology Research Unit, School of Public Health<br/>Reglinska-Matveyev, Natalia; The University of Edinburgh, Edinburgh Dementia Prevention, Centre for Clinical Brain Sciences<br/>Ropacki, Michael; Janssen Research and Development Fremont<br/>Ketter, Nzeera; Janssen Alzheimer Immunotherapy Research and Development LLC<br/>Fogle, Michael; Janssen Research and Development LLC<br/>Raghavan, Nandini ; Janssen Research and Development LLC<br/>Arrighi, Michael ; Janssen Research and Development Fremont<br/>Brashear, Robert; Janssen Alzheimer Immunotherapy Research and Development LLC<br/>Di, Jianing; Janssen Research and Development Shanghai, Department of Biostatistics<br/>Baker, Susan; Janssen Research and Development LLC<br/>Giannakopoulou, Parthenia; Imperial College London, Ageing Epidemiology Research Unit, School of Public Health<br/>Robb, Catherine; Imperial College London, Ageing Epidemiology Research Unit, School of Public Health<br/>Bassil, Darina; Imperial College London, Ageing Epidemiology Research Unit, School of Public Health<br/>Cohn, Martin; Imperial College London, Ageing Epidemiology Research Unit, School of Public Health<br/>McLellan-Young, Heather; Imperial College London, Ageing Epidemiology Research Unit, School of Public Health<br/>Crispin, Jennifer; Imperial College London, Ageing Epidemiology Research Unit, School of Public Health<br/>Lakey, Kristina; Imperial College London, Ageing Epidemiology Research Unit, School of Public Health<br/>Lisa, Curry; Imperial College London, Ageing Epidemiology Research</p> |

|                                    |                                                                                                                                                                                                                                                                                                                                                                                                                                                                                                                                                                                                                                                                                                                                                                                                                                                                                                                                                                                                                                                                                                                                                                                                                                                                                                                                                                                                                                                                                                                                                                                                                                                                                                                                                                                                                                                                                                                                                                                                                                                                                            |
|------------------------------------|--------------------------------------------------------------------------------------------------------------------------------------------------------------------------------------------------------------------------------------------------------------------------------------------------------------------------------------------------------------------------------------------------------------------------------------------------------------------------------------------------------------------------------------------------------------------------------------------------------------------------------------------------------------------------------------------------------------------------------------------------------------------------------------------------------------------------------------------------------------------------------------------------------------------------------------------------------------------------------------------------------------------------------------------------------------------------------------------------------------------------------------------------------------------------------------------------------------------------------------------------------------------------------------------------------------------------------------------------------------------------------------------------------------------------------------------------------------------------------------------------------------------------------------------------------------------------------------------------------------------------------------------------------------------------------------------------------------------------------------------------------------------------------------------------------------------------------------------------------------------------------------------------------------------------------------------------------------------------------------------------------------------------------------------------------------------------------------------|
|                                    | <p>Unit, School of Public Health<br/> Chowdary Seemulamoodi , Yellappa; Imperial College London, Ageing<br/> Epidemiology Research Unit, School of Public Health<br/> Kafetsouli, Dimitra; Imperial College London, Ageing Epidemiology<br/> Research Unit, School of Public Health<br/> Perera, Dinithi; Imperial College London, Ageing Epidemiology Research<br/> Unit, School of Public Health<br/> Car, Josip; Imperial College London, Department of Primary Care and<br/> Public Health, School of Public Health; Nanyang Technological University,<br/> Centre for Population Health Sciences (CePHaS), Lee Kong Chian School<br/> of Medicine<br/> Majeed, Azeem; Imperial College London, Department of Primary Care<br/> and Public Health, School of Public<br/> Ward, Heather; Imperial College London, Department of Epidemiology<br/> and Biostatistics, School of Public<br/> Ritchie, Karen; INSERM, University of Montpellier, Neuropsychiatry:<br/> Epidemiological and Clinical Research,; The University of Edinburgh,<br/> Edinburgh Dementia Prevention, Centre for Clinical Brain Sciences<br/> Perneckzy, Robert; Ludwig Maximilians University Munich, Department of<br/> Psychiatry and Psychotherapy, University Hospital ; Imperial College<br/> London, Ageing Epidemiology Research Unit, School of Public Health<br/> Kivipelto, Miia; Karolinska Institutet, Division of Clinical Geriatrics,<br/> Center for Alzheimer Research, Department of Neurobiology, Care<br/> Sciences and Society; Imperial College London, Ageing Epidemiology<br/> Research Unit, School of Public Health<br/> Scott, David; BioClinica Inc Newark California Office<br/> Bracoud, Luc; BioClinica Inc Lyon<br/> Saad, Ziad; Janssen Research and Development Fremont<br/> Novak, Gerald; Janssen Research and Development LLC<br/> Ritchie, Craig; The University of Edinburgh, Edinburgh Dementia<br/> Prevention, Centre for Clinical Brain Sciences<br/> Middleton, Lefkos; Imperial College London, Ageing Epidemiology<br/> Research Unit, School of Public Health</p> |
| <b>Primary Subject<br>Heading</b>: | Geriatric medicine                                                                                                                                                                                                                                                                                                                                                                                                                                                                                                                                                                                                                                                                                                                                                                                                                                                                                                                                                                                                                                                                                                                                                                                                                                                                                                                                                                                                                                                                                                                                                                                                                                                                                                                                                                                                                                                                                                                                                                                                                                                                         |
| Secondary Subject Heading:         | Neurology                                                                                                                                                                                                                                                                                                                                                                                                                                                                                                                                                                                                                                                                                                                                                                                                                                                                                                                                                                                                                                                                                                                                                                                                                                                                                                                                                                                                                                                                                                                                                                                                                                                                                                                                                                                                                                                                                                                                                                                                                                                                                  |
| Keywords:                          | EPIDEMIOLOGY, Dementia < NEUROLOGY, PREVENTIVE MEDICINE, Old<br>age psychiatry < PSYCHIATRY                                                                                                                                                                                                                                                                                                                                                                                                                                                                                                                                                                                                                                                                                                                                                                                                                                                                                                                                                                                                                                                                                                                                                                                                                                                                                                                                                                                                                                                                                                                                                                                                                                                                                                                                                                                                                                                                                                                                                                                                |
|                                    |                                                                                                                                                                                                                                                                                                                                                                                                                                                                                                                                                                                                                                                                                                                                                                                                                                                                                                                                                                                                                                                                                                                                                                                                                                                                                                                                                                                                                                                                                                                                                                                                                                                                                                                                                                                                                                                                                                                                                                                                                                                                                            |

SCHOLARONE™  
Manuscripts



I, the Submitting Author has the right to grant and does grant on behalf of all authors of the Work (as defined in the below author licence), an exclusive licence and/or a non-exclusive licence for contributions from authors who are: i) UK Crown employees; ii) where BMJ has agreed a CC-BY licence shall apply, and/or iii) in accordance with the terms applicable for US Federal Government officers or employees acting as part of their official duties; on a worldwide, perpetual, irrevocable, royalty-free basis to BMJ Publishing Group Ltd ("BMJ") its licensees and where the relevant Journal is co-owned by BMJ to the co-owners of the Journal, to publish the Work in this journal and any other BMJ products and to exploit all rights, as set out in our [licence](#).

The Submitting Author accepts and understands that any supply made under these terms is made by BMJ to the Submitting Author unless you are acting as an employee on behalf of your employer or a postgraduate student of an affiliated institution which is paying any applicable article publishing charge ("APC") for Open Access articles. Where the Submitting Author wishes to make the Work available on an Open Access basis (and intends to pay the relevant APC), the terms of reuse of such Open Access shall be governed by a Creative Commons licence – details of these licences and which [Creative Commons](#) licence will apply to this Work are set out in our licence referred to above.

Other than as permitted in any relevant BMJ Author's Self Archiving Policies, I confirm this Work has not been accepted for publication elsewhere, is not being considered for publication elsewhere and does not duplicate material already published. I confirm all authors consent to publication of this Work and authorise the granting of this licence.

1  
2  
3 **Protocol of The Cognitive Health in Ageing Register: Investigational, Observational and**  
4 **Trial Studies in Dementia Research (CHARIOT): Prospective Readiness cOhort (PRO)**  
5 **SubStudy**  
6  
7

8  
9 DOCUMENT: Manuscript (Epidemiology)  
10

11 TARGET JOURNAL: British Medical Journal – Open Access (BMJOpen)  
12

13  
14 Abstract: 300 words  
15

16 Manuscript text: 5035 words (excluding references)  
17

18  
19 References: 33  
20

21 Tables and Figures: 1 Table and 3 figures  
22  
23  
24  
25  
26  
27  
28  
29  
30  
31  
32  
33  
34  
35  
36  
37  
38  
39  
40  
41  
42  
43  
44  
45  
46  
47  
48  
49  
50  
51  
52  
53  
54  
55  
56  
57  
58  
59  
60

1  
2  
3 Chinedu Udeh-Momoh, PhD<sup>1,2</sup>, Tamlyn Watermeyer, PhD<sup>3,4</sup>, Geraint Price, DClinPsych<sup>1</sup>,  
4 Celeste A de-Jager Loots, PhD<sup>1</sup>, Natalia Reglinska-Matveyev, PhD<sup>3</sup>, Michael T. Ropacki,  
5 PhD<sup>5</sup>, Michael Fogle, MSc<sup>7</sup>, Nzeera Ketter, MD<sup>6</sup>, Nandini Raghavan, PhD<sup>7</sup>, H. Michael  
6 Arrighi, PhD<sup>5</sup>, H. Robert Brashear, MD<sup>6</sup>, Jianing Di, PhD<sup>8</sup>, Susan Baker, PhD<sup>7</sup>, Parthenia  
7 Giannakopoulou, PhD<sup>1</sup>, Catherine Robb, PhD<sup>1</sup>, Darina T. Bassil, PhD<sup>1</sup>, Martin Cohn MD<sup>1</sup>,  
8 Heather McLellan-Young MSc.<sup>1</sup>, Jennifer Crispin BA.<sup>1</sup>, Kristina Lakey BSc.<sup>1</sup>, Lisa K. Curry  
9 MSc.<sup>1</sup>, Yellappa Chowdary Seemulamoodi MD<sup>1</sup>, Dimitra Kafetsouli, MD, PhD<sup>1</sup>, Dinithi  
10 Perera, LL.M<sup>1</sup>, Josip Car, MD<sup>9,10</sup>, Azeem Majeed, MD<sup>9</sup>, Heather A. Ward, PhD<sup>11</sup>, Karen  
11 Ritchie, PhD<sup>3,12</sup>, Robert Pernecky, Prof. MD<sup>1,13,14,15</sup>, Miia Kivipelto, MD, PhD<sup>1,16,17,18</sup>,  
12 David Scott, PhD<sup>19</sup>, Luc Bracoud, MSc<sup>20</sup>, Ziad Saad PhD<sup>5</sup>, Gerald Novak MD<sup>7\*</sup>, Craig  
13 Ritchie, MD, PhD<sup>3</sup> and Lefkos Middleton, MD<sup>1</sup>

14  
15  
16  
17  
18  
19  
20  
21  
22  
23 <sup>1</sup>Imperial College London, Ageing Epidemiology Research Unit, School of Public Health,  
24 London, W6 8RP, UK

25  
26  
27 <sup>2</sup>Translational Health Sciences, Bristol Medical School, University of Bristol, Bristol, UK

28  
29  
30  
31 <sup>3</sup>Edinburgh Dementia Prevention, Centre for Clinical Brain Sciences, University of  
32 Edinburgh, Edinburgh, UK

33  
34  
35  
36 <sup>4</sup>Department of Psychology, Faculty of Health and Life Sciences, Northumbria University,  
37 Newcastle, UK

38  
39  
40  
41  
42  
43 <sup>5</sup>Janssen Research & Development, LLC, Fremont, California, 94555, USA

44  
45  
46  
47  
48  
49 <sup>6</sup>Janssen Alzheimer Immunotherapy Research & Development, LLC, South San Francisco,  
50 California 94080, USA

51  
52  
53  
54  
55  
56  
57  
58  
59  
60 <sup>7</sup>Janssen Research & Development, LLC, Titusville, NJ 08560, USA

<sup>8</sup>Janssen China Research and Development Center, Department of Biostatistics, Shanghai,  
China

<sup>9</sup>Imperial College London, Department of Primary Care and Public Health, School of Public  
Health, London, W6 8RP, UK

<sup>10</sup>Centre for Population Health Sciences (CePHaS), Lee Kong Chian School of Medicine,  
Nanyang Technological University, 308232 Singapore, Singapore



1  
2  
3 <sup>11</sup>Imperial College London, Department of Epidemiology and Biostatistics, School of Public  
4 Health, London, W3 1PG, UK

5  
6  
7 <sup>12</sup>INSERM, University of Montpellier, Neuropsychiatry: Epidemiological and Clinical  
8 Research, Montpellier, France

9  
10  
11 <sup>13</sup>University Hospital, LMU Munich, Department of Psychiatry and Psychotherapy, 80336  
12 München, Germany

13  
14  
15 <sup>14</sup>German Center for Neurodegenerative Diseases (DZNE) Munich, 81377 München,  
16 Germany

17  
18  
19 <sup>15</sup>Munich Cluster for Systems Neurology (SyNergy), Munich, Germany

20  
21  
22 <sup>16</sup>Public Health Promotion Unit, National Institute for Health and Welfare (THL), Helsinki,  
23 Finland. mii.kivipelto@ki.se.

24  
25  
26 <sup>17</sup>Division of Clinical Geriatrics, Center for Alzheimer Research, Department of  
27 Neurobiology, Care Sciences and Society, Karolinska Institutet, Stockholm, Sweden.

28  
29  
30 <sup>18</sup>Institute of Clinical Medicine, Neurology, University of Eastern Finland, Kuopio, Finland.

31  
32  
33 <sup>19</sup>Bioclinica Inc, Newark, CA 94560 USA

34  
35  
36 <sup>20</sup>Bioclinica Inc, Lyon, France

37  
38  
39  
40 \*Corresponding author: Gerald Novak, MD; Janssen Research & Development, LLC, 1125  
41 Trenton-Harbourton Rd., Titusville, NJ 08560, USA. E-mail: gnovak1@its.jnj.com

#### 42 43 44 45 46 **Trial Registration**

47  
48 The CHARIOT:PRO SubStudy is registered with clinicaltrials.gov (NCT02114372). Notices  
49 of Protocol modifications will be made available through this trial registry.

#### 50 51 52 53 **Funding statement**

54  
55 This work was supported by Janssen Pharmaceuticals Research & Development, LLC  
56  
57  
58  
59  
60

### Competing Interests Statement:

The study is funded by Janssen Research & Development, LLC. Michael T. Ropacki was formerly employee of Janssen and is an industry consultant. Gerald Novak, Susan Baker, H. Michael Arrighi, Michael Fogle, Keith Karcher, Ziad Saad and Nandini Raghavan are employees of Janssen Research & Development, LLC and own stock/stock options in the company. Nzeera Ketter and H. Robert Brashear are former employees of Janssen Research & Development, LLC and both own stock/stock options in the company. Jianing Di is an employee of Janssen China Research and Development Center and owns stock/stock options in the company. Lefkos Middleton served as principal study investigator at Imperial College of London (ICL) and has held consultancy agreements, in the last five years, with Eli Lilly, Astra Zeneca and Takeda and is National Coordinator for the TOMMORROW, Amaranth and Generation Clinical Studies; and does not hold any agreement with any of the funders in relation to patents, products in development relevant to this study or marketed products. Craig Ritchie served as principal study investigator at Edinburgh University (EDI), and has served as a consultant in the last five years for: Actinogen, Biogen, Roche Pharmaceuticals and Roche Diagnostics, Eisai, Abbott Pharmaceuticals, Eli Lilly, Kyowa Kirin, Signant Health, Merck and Nutricia. He is also the Chief Investigator and Co-coordinator of IMI-EPAD which is a public-private partnership of 39 partners [www.ep-ad.org](http://www.ep-ad.org).

Chinedu Udeh-Momoh, Josip Car, Robert Pernecky, Geraint Price, Celeste de-Jager Loots, Heather Ward and Miia Kivipelto served as co-principal study investigators at ICL for Janssen Research & Development, LLC and all declare no conflict of interest. Josip Car's and Azeem Majeed's posts at ICL are in part supported by the NIHR NW London Applied Research Collaboration. Catherine Robb, Darina Bassil, Martin Cohn, Parthenia Giannakopoulou, Dimitra Kafetsouli, Yellappa Chowdary-Seemulamoodi, Dinithi Perera, Lisa Curry, Kristina Lakey, Heather McLellan-Young, Jennifer Crispin and Azeem Majeed were study investigators at ICL and declare no conflict of interest. Karen Ritchie served as co-principal study investigator at EDI for Janssen Research & Development, LLC and declares no conflict of interest. Tamlyn Watermeyer and Natalia Reglinska-Matveyev were study investigators at EDI and declare no conflict of interest. David Scott and Luc Bracoud are employees of Bioclinica Inc. and declare no competing interests.

## ABSTRACT

**Introduction:** The CHARIOT:PRO SubStudy (CPSS), sponsored by Janssen Pharmaceutical Research & Development LLC, is an Alzheimer's disease (AD) biomarker enriched observational study that began 3<sup>rd</sup> July 2015 CPSS aims to identify and validate determinants of AD, alongside cognitive, functional and biological changes in older adults with or without detectable evidence of AD pathology at baseline.

**Methods and Analysis:** CPSS is a dual-site longitudinal cohort (3.5 years) assessed quarterly. Cognitively normal participants (60-85 years) were recruited across Greater London (n=2508) and Edinburgh (n=1695). Participants are classified as high, medium (amnesic or non-amnesic) or low risk for developing mild cognitive impairment–Alzheimer's disease (MCI-AD) based on their Repeatable Battery for the Assessment of Neuropsychological Status (RBANS) performance at screening. Additional AD-related assessments include: a novel cognitive composite, the Global Preclinical Alzheimer's Cognitive Composite (G-PACC), brain magnetic resonance imaging (MRI) and positron emission tomography (PET) and cerebrospinal fluid (CSF) analysis. Lifestyle, other cognitive and functional data, as well as bio-samples (blood, urine, and saliva) are collected. Primarily, study analyses will evaluate longitudinal change in cognitive and functional outcomes. Annual interim analyses for descriptive data occur throughout the course of the study, although inferential statistics are conducted as required.

**Ethics and Dissemination:** CPSS received ethical approvals from the London - Central Research Ethics Committee (15/LO/0711) and the Administration of Radioactive Substances Advisory Committee (RPC 630/3764/33110) The study is at the forefront of global AD prevention efforts, with frequent and robust sampling of the well-characterised cohort, allowing for detection of incipient pathophysiological, cognitive and functional changes that could inform therapeutic strategies to prevent and/or delay cognitive impairment and dementia. Dissemination of results will target the scientific community, research participants, volunteer community, public, industry, regulatory authorities and policymakers. Upon study completion, and following a predetermined embargo period, CPSS data is planned to be made accessible for analysis to facilitate further research into the determinants of AD pathology, onset of symptomatology and progression.

**Key Words:** Epidemiology; Neurology; Psychiatry; Dementia; Preventative Medicine

## STRENGTHS AND LIMITATIONS

### Strengths

- Prospectively-designed, high-powered longitudinal cohort of cognitively-healthy (at baseline) elders across the Alzheimer's pathological continuum followed up at high-throughput using biological, psycho-social, cognitive, behavioural and lifestyle measures
- Study adopts a unique cognition-based classification method for designating risk of MCI-AD development from baseline.

### Limitations:

- Given the low amyloid positivity rate and the requirement of an equal number of CPSS participants above and below threshold, a high number of participants (78.6%) were excluded from the longitudinal CPSS study.
- The conduct of the study at only 2 sites does not fit the model of a typical, multi-site international clinical trial.

## INTRODUCTION

**Background and Rationale:** The last few decades have witnessed unparalleled growth in aged populations. Hence, the global incidence and prevalence of Alzheimer's disease (AD), the most-common form of late-onset dementia, continue to increase exponentially, with numbers expected to exceed 150 million global cases by 2050 [1]. The paucity of any viable therapy for dementia prevention and/or disease modification necessitates a re-think of the conventional approach towards preventative research. Indeed, the AD field will benefit from concerted efforts for preventative strategies combining biomarker discovery studies with detailed validation of clinical characteristics as well as longitudinal explorations of associated pathologies and symptoms.

The asymptomatic stage of AD is characterized by biomarker evidence of amyloid- $\beta$  ( $A\beta$ ) deposition, as measured by either low cerebrospinal fluid (CSF)  $A\beta_{42}$  peptide concentrations or elevated tracer uptake on  $A\beta$  positron emission tomography (PET) scans [2]. Multiple studies have now reported that higher  $A\beta$  burden in cognitively normal (CN) individuals is associated with measurably poorer performance in neuropsychological tests [3]. The

1  
2  
3 accumulating longitudinal data also strongly suggest that evidence of abnormal levels of A $\beta$   
4 deposition in CN individuals increases the risk for cognitive decline and progression to mild  
5 cognitive impairment (MCI) and AD dementia [3]. The current consensus among members of  
6 the Alzheimer's scientific community is that these CN individuals with detectable pathogenic  
7 A $\beta$  represent an early stage on the AD continuum [2, 4, 5]. Indeed, a meta-analysis of 55 studies  
8 suggested that approximately 20% to 35% of study participants aged over 60 years without  
9 dementia symptoms are likely to have above-threshold pathogenic A $\beta$  pathology detected by  
10 PET [6], with numbers increasing to 90% by age 85 [7].

11  
12  
13  
14  
15  
16  
17  
18 Rate of cognitive decline in CN individuals with or without evidence of abnormal A $\beta$   
19 deposition can be measured using sensitive cognitive composite instruments. These measures  
20 focus on the cognitive domains affected earliest in AD, namely episodic memory and executive  
21 function, with decline noted as early as 7 to 10 years prior to the diagnosis of MCI or AD  
22 dementia [8-10]. Yet, gaps remain in our understanding of the exact predictors of AD  
23 pathological onset, accumulation and resultant development of clinical symptoms. There is a  
24 need to identify individuals at varying levels of risk for AD, prior to development of AD  
25 dementia. Such information would be useful to improve our understanding of the natural  
26 history of AD progression and identify opportunities for intervention.

27  
28  
29  
30  
31  
32  
33  
34 The CHARIOT:PRO program seeks to address such gaps via detailed explorations of the  
35 determinants of AD-related biological, clinical and cognitive changes. The previously-reported  
36 main study of 987 participants at ICL, conducted from 2013 to 2016 (following early  
37 termination by the study Sponsor) [11] was further adapted into a large prospective  
38 observational trial – The CHARIOT: PRO SubStudy (CPSS) aimed at enhancing the scientific  
39 robustness of the main study objectives with the addition of imaging and other AD-related  
40 assessment tools.

41  
42  
43  
44  
45  
46 Here we describe the protocol (from Amendment version 15, dated 15<sup>th</sup> Aug 2018) of this  
47 biomarker enriched CPSS featuring neuropsychological, functional, lifestyle, imaging and  
48 other biomarker assessments and the schedule for their collection. We provide an outline of the  
49 study design and a summary of the recruitment and screening process leading to the fully  
50 enrolled cohort of 519 cognitively unimpaired adults.

51  
52  
53  
54  
55  
56 **Objectives of the CPSS:** CPSS is a prospective dual-centre, UK cohort study that at its core  
57 aims to characterise deeply the clinico-biological attributes of the non-symptomatic AD stage  
58 in individuals at differing levels of risk for development of MCI and AD-dementia, based on  
59  
60

1  
2  
3 cognitive test scores at screening. CPSS participants thus could form a readiness cohort to be  
4 recruited onto future AD-dementia prevention trials.  
5

6  
7 Specifically, using data from participants with evidence of detectable A $\beta$  pathology versus  
8 those with below-threshold levels, the study will:  
9

- 10  
11 - Investigate the longitudinal change of the global and composite measures of the newly-  
12 developed Global Preclinical Alzheimer's Cognitive Composite (G-PACC) in  
13 comparison to the Repeatable Battery for the Assessment of Neuropsychological Status  
14 [RBANS, 12] and other study neuropsychological assessments, as well as  
15 psychometrically evaluate the test batteries  
16  
17 - Determine precise baseline predictors of longitudinal AD-related cognitive and  
18 functional decline, and clinical progression to improve future screening of participants  
19 most likely to develop MCI-AD/ AD dementia  
20  
21  
22  
23  
24  
25  
26  
27  
28  
29

## 30 **METHODS**

### 31 **Population**

32  
33 The CPSS participants are adults aged 60 to 85 years old (inclusive), residing in Greater  
34 London, South West England, Edinburgh and surrounding districts. Those included had  
35 documented evidence of A $\beta$  pathology (A $\beta$  positives: above-threshold brain A $\beta$  deposition on  
36 PET or below-threshold CSF A $\beta_{42}$  concentration), or evidence of below-threshold A $\beta$   
37 pathology (A $\beta$  negatives: below-threshold brain A $\beta$  deposition on PET or above-threshold CSF  
38 A $\beta_{42}$  concentration), and a baseline global Clinical Dementia Rating (CDR) score=0. CPSS  
39 participants were classified at screening as *high*, *medium-amnestic or non-amnestic*, or *low risk*  
40 for developing MCI due to AD (MCI-AD), based on cognitive test performance as described  
41 previously [11].  
42  
43  
44  
45  
46  
47  
48  
49

### 50 **Study Design**

51  
52 The CPSS is a UK prospective observational study taking place across two sites (ICL and EDI).  
53 The study is planned to follow approximately 250 CN participants who are A $\beta$  positive and  
54 approximately 250 A $\beta$  negative CN control participants for up to three and a half years.  
55 Evidence of A $\beta$  pathology was assessed via CSF A $\beta_{42}$  except where lumbar puncture (LP) was  
56  
57  
58  
59  
60

1  
2  
3 medically contraindicated or refused by participants, in which case A $\beta$  PET was permitted as  
4 an alternative method of determination of A $\beta$  status. CSF samples were tested with the Meso  
5 Scale Discovery (MSD) triplex (A $\beta_{38/40/42}$ ). A binary classification for A $\beta$  load was applied  
6 using a cut-off value for CSF A $\beta_{42} \leq 600$  ng/L. The cut-off for brain A $\beta$  PET via standardized  
7 uptake value ratio (SUVR) was based on three independent F18-radiolabeled amyloid tracers  
8 - florbetapir, flutemetamol, and florbetaben. A specific SUVR threshold (i.e. a cut-point) was  
9 used for each of the three radiotracers (Amyvid: 1.14 with whole-cerebellum as a reference  
10 region, Neuraceq: 1.20 with cerebellar grey matter, Vizamyli: 1.23 with whole cerebellum).  
11 Scans were reported as amyloid positive if the composite cortical SUVR value was above the  
12 defined tracer-specific threshold, and negative if less than or equal to the threshold value.  
13  
14  
15  
16  
17  
18  
19  
20

21 All study investigators, sponsor team and participants are blinded as to A $\beta$  status information,  
22 with the exception of an unblinded team member for verification of imaging and CSF A $\beta$   
23 information. Blinding was put in place to avoid bias for conducting, monitoring and  
24 interpreting results from the clinical assessments (except for research analysis purposes). The  
25 same double-blind is maintained for apolipoprotein E (*APOE*) genotype, in view of allele-  
26 specific positive correlation with A $\beta$  load [13-15]. A $\beta$  status and *APOE* genotype results were  
27 not disclosed to participants as the clinical value (i.e., diagnostic or predictive) of such a  
28 disclosure in a CN population is still unestablished. If clinical value is established from this or  
29 other studies, then amyloid and *APOE* genotype will be disclosed to participants, at the end of  
30 the study.  
31  
32  
33  
34  
35  
36  
37  
38

39 Numbers of A $\beta$  negative participants who passed screening assessments were deliberately  
40 controlled to ensure equivalency with number of eligible A $\beta$  positive participants. There was  
41 no deliberate effort to balance the groups by age or gender.  
42  
43  
44

## 45 **Study schedule**

### 46 *Participant recruitment*

47  
48  
49 At the ICL site, participants were recruited primarily from the CHARIOT Register, a well-  
50 established dementia prevention and prediction register of older adults without dementia who  
51 have provided consent to be contacted for relevant ageing research [16, 17]. Some participants  
52 transitioned directly to CPSS from the Main study, though most of these individuals had  
53 previously been recruited also from the CHARIOT Register. Additional methods of  
54 recruitment at the site, with very limited numbers of enrolled participants, included self-  
55 referrals and response from media advertisements. At the Edinburgh site, participants were  
56  
57  
58  
59  
60

1  
2  
3 recruited via SHARE (<https://www.registerforshare.org>), Join Dementia Research (JDR,  
4 <https://www.joindementiaresearch.nihr.ac.uk/>) and the Scottish Primary Care Research  
5 Network (SPCRN [http://www.nhsresearchscotland.org.uk/research-areas/primary-care/about-](http://www.nhsresearchscotland.org.uk/research-areas/primary-care/about-the-network)  
6 [the-network](http://www.nhsresearchscotland.org.uk/research-areas/primary-care/about-the-network)) (See Figure 1 for the participant recruitment pathway).  
7  
8  
9

### 10 *Selection of study participants: summary of eligibility criteria*

11  
12  
13 The major exclusion criteria for CPSS include known familial autosomal dominant AD,  
14 diagnosis of AD dementia, MCI, or any other degenerative brain disorder that is associated  
15 with dementia at screening. Evidence of brain disease or other conditions leading to dementia,  
16 other than AD-related structural pathologies were assessed centrally by blinded neuro-  
17 radiologists via magnetic resonance imaging (MRI) during screening. Additionally, use of AD  
18 pharmacological therapies, and evidence of psychiatric/cognitive disorders/other abnormalities  
19 such as low vitamin B12 (specifically those with abnormal homocysteine and methylmalonic  
20 acid), and linked to cognitive deficits are exclusionary. Further, history of first-degree family  
21 member with diagnosed clinical AD was required for participants aged 60-65 years. This  
22 measure was put in place to enrich the cohort for cerebral A $\beta$  positivity given typically lower  
23 prevalence in asymptomatic young elders i.e. below 70 years of age [18], thereby effectively  
24 minimizing screen failure rates. Following participants' consent, self-reported medical and  
25 medication history was confirmed from full history provided by participants' general  
26 practitioner (GP). Upon receipt of any medical information, current medical conditions and  
27 past medical history was updated on source documents and subsequently on electronic data,  
28 including medication, past and planned procedures. Medical summaries from GPs were used  
29 to ascertain self-reported histories.  
30  
31  
32  
33  
34  
35  
36  
37  
38  
39  
40  
41  
42

43 During screening, participants whose cognitive performance on any RBANS Index fell more  
44 than 1.5 standard deviations below the (age- and education-adjusted) population mean (based  
45 on normative sample from [19]) were referred to an adjudication panel. This panel, comprised  
46 of neurologists, psychiatrists and neuropsychologists, considered whether the low performance  
47 was likely to be attributable to undiagnosed cognitive impairment and, if so, excluded the  
48 participant from the study. These participants were contacted directly by the study team to  
49 inform them of their exclusion. At that time, where any concerns were noted regarding their  
50 performance, the option to notify their GP with information about the study and their exclusion  
51 was offered.  
52  
53  
54  
55  
56  
57  
58

### 59 *Screening schedule*



1  
2  
3 The screening was usually completed in four separate visits within a 90-day window. On  
4 certain occasions, this timeline was extended up to 180 days to allow for treatment of transient  
5 conditions, laboratory retesting, and scheduling of other screening assessments. This allowed  
6 time for results to be received and evaluated against study eligibility criteria. Any clinically  
7 significant findings were passed on for follow-up to the participant's GP. Participants who were  
8 determined to have an active unstable illness, as defined by the inclusion/exclusion criteria,  
9 were excluded. Screening involved collection of demographic data which included age,  
10 ethnicity, education and occupational status. During screening, potential participants  
11 completed cognitive tests, the G-PACC and RBANS, and CDR including the study partner  
12 interview. A clinical evaluation (pulse, blood pressure, weight, head, waist & hip  
13 circumference, temperature (tympanic), physical and neurological examination) and clinical  
14 lab assessments were carried out to determine general health status. Participants not excluded  
15 at this stage then underwent a brain MRI. If MRI did not reveal exclusionary abnormalities  
16 (see Table 1), it was followed by an A $\beta$  assessment based on CSF analysis or brain PET scan.  
17 After the A $\beta$  determination, baseline assessments were undertaken at two consecutive visits  
18 where the RBANS (form A), G-PACC (form A) as well as the Neuropsychological Assessment  
19 Battery (NAB) Memory and Executive Function modules (form 1) and the National Adult  
20 Reading Test (NART) were administered alongside self-reported study questionnaires. Bio-  
21 samples were further collected for biomarker assessments. (See Figure 2 for schematic  
22 depiction of screening and baseline assessments).

### 38 *Post-screening schedule*

39  
40 Following the baseline assessment, CPSS participants were randomized in a balanced 1:1:1  
41 ratio, stratified by A $\beta$  status and level of performance on the screening RBANS, to one of three  
42 supplemental neuropsychological tests namely: CogState Brief Battery [20], Cognitive Drug  
43 Research Assessment System, and either Delis-Kaplan Executive Function System [DKEFS,  
44 21, ICL only] or COGNITO [22, EDI only]. Participants who enrolled in the Substudy from  
45 the Main Study retained their previous Main Study-assigned randomized group. Participants  
46 are expected to attend study visits every quarter and will be followed up for a period of up to  
47 3.5 years. Due to the COVID-19 restrictions that were implemented in March 2020 in the UK,  
48 the CPSS was transitioned to virtual visits to allow continued longitudinal assessments. For  
49 further details on our strategy for operationalising this activity, please see [23]. As part of the  
50 general visits, we collect detailed information on all medical, especially Covid-related incidents  
51  
52  
53  
54  
55  
56  
57  
58  
59  
60

1  
2  
3 including more recently information on Covid-19 vaccinations. These data are designated  
4 Covid-related within our database for easy identification of such cases.  
5  
6

## 7 **Study outcomes and assessments**

### 8 *Primary neurocognitive outcomes*

9  
10  
11 The primary outcomes of the CPSS are performance in two neurocognitive measures, the novel  
12 G-PACC and the RBANS.  
13  
14

15  
16 The G-PACC: is a retrospectively and theoretically derived and validated measure, weighted  
17 towards episodic memory but including a timed executive function test and a global cognitive  
18 screening test [24]. For this study, the four PACC components include: the Free and Cued  
19 Selective Reminding Test -Immediate Recall [FCSRT-IR, 25], the Delayed Paragraph Recall  
20 score on a single administration of the Logical Memory story from the WMS – Revised [26],  
21 the WAIS-IV Coding subtest [27] and the MMSE [28]. Each component score is transformed  
22 into z-scores. These z-scores are summed to form the composite. The battery takes about 25  
23 minutes to administer. Alongside screening and baseline time points, alternating forms of the  
24 G-PACC are administered at the following time points: Months 6, 12, 18, 24, 30, 36, 42.  
25  
26  
27  
28  
29  
30  
31

32  
33 The RBANS: is a 25-minute composite battery with 12 subtests that measure 5 cognitive  
34 domain indices: Attention, composed of Digit Span and Coding, Language, with Picture  
35 Naming and Semantic Fluency subtests, Visuospatial Construction including Figure Copy and  
36 Line Orientation subtests, Immediate Memory comprising List Learning and Story Memory  
37 subtests, and Delayed Memory composed of List Recall, List Recognition, Story Recall, and  
38 Figure Recall subtests. The sum of these 5 Index scores is converted to a Total Scale value via  
39 a mapping table. The Total Scale is a norm-based t-score based on a distribution with a mean  
40 of 100 and standard deviation of 15. The RBANS is administered face-to-face, has 3 alternate  
41 forms, is available in over 30 languages, and has been used in multinational clinical trials  
42 including AD trials. Alternating forms of the RBANS are also administered at the following  
43 timepoints: Months 3, 9, 15, 21, 27, 33, 39. During screening, participants' RBANS scores  
44 were used to delineate risk (low, medium, high) for developing MCI-AD, as described in the  
45 Main study [11].  
46  
47  
48  
49  
50  
51  
52  
53  
54

55  
56 Secondary Cognitive outcomes and Functional outcomes are described in Table 2. More  
57 detailed description of these measures are provided in the CHARIOT PRO Main Study  
58 Protocol [11].  
59  
60

### *Neuroimaging outcomes*

Safety and volumetric scans (3DT1, FLAIR, T2\*, PD/T2, T1 and DWI): All potential CPSS participants underwent brain MRI at screening to assess eligibility, based on a central radiologist's interpretation of the MRI scan under the supervision of Bioclinica Inc. Borderline findings were reviewed by the Medical Monitor prior to determining participant eligibility. Image acquisition was performed at multiple sites based on a standardized MRI protocol. General Electric Signa HDxt 1.5T and Siemens TrioTim, Verio, Skyra and Prisma 3T scanners were used to acquire a volumetric 3D T1 weighted series in a sagittal plane, using 1.2 mm thick slices and a 192x192 acquisition matrix over a square FOV of 240 mm. Contrast parameters were field-strength and manufacturer dependent (Siemens MP-RAGE and GE IR-Prep Fast SPGR). The standardized MRI protocol also included 2D axial FLAIR, T2\* gradient echo, dual-echo proton-density and T2-weighted turbo/fast spin echo, T1-weighted turbo/fast spin echo and diffusion-weighted imaging. Proper implementation of the MRI protocol on each participating scanner was verified prior to first subject scan by use of American College of Radiology (ACR) phantom scans.

Exploratory scans (Task-free BOLD functional MRI (tf-fMRI) and high-resolution coronal T2sequences): At the ICL site, the first 800 subjects who were eligible for MRI underwent a dual-echo GRE field map and task-free functional MRI time series. For the remainder of the subjects, a high-resolution 2D coronal T2-weighted sequence was acquired, in order to visualize hippocampal subfields.

A $\beta$  PET: At final stage of screening, evidence of A $\beta$  pathology in potential CPSS participants was assessed by a brain PET scan. All images derived were evaluated centrally at Bioclinica Inc. for A $\beta$  status assessment. The assessments were performed by neuro-radiologists trained in the assessment of A $\beta$  PET scans using F18-radiolabeled amyloid tracers (Amyvid, Vizamyl and Neuraceq) for amyloid status according to the reading process developed by radiotracer vendors. The PET scan was evaluated at baseline to determine each patient's A $\beta$  status as positive or negative and therefore inclusion or exclusion into the trial. PET exams were acquired using a uniform scanning protocol that minimizes and accounts for between-site differences in PET systems, as characterized with a Hoffman phantom exam. All exams were acquired in 3D mode and employed correction for attenuation, scatter and random coincidence. Semi-quantitative SUVR assessment was performed prior to the visual read. SUVR calculations leveraged a FreeSurfer-based native-space MRI segmentation method. The A $\beta$

1  
2  
3 status assessment was a hybrid visual and quantitative approach (see Figure 3). A visual review  
4 was performed by a single reader, followed by positivity assignment based on SUVR cutpoint.  
5 In case of discrepancies between visual and SUVR results, a second reader was asked to  
6 participate in a final decision on amyloid status, as part of a consensus review. The second  
7 reader was given both the initial visual read and the SUVR measurement and convened with  
8 the first reader to arrive at a consensus assessment.  
9

### 14 *Fluid Biomarkers*

16 Blood, saliva and urine samples for clinical assessments and future biomarker discovery  
17 studies: At ICL and EDI, blood and urine samples were collected at screening to assess general  
18 health status. These included: Haematology and Differential Panel, Lipid Panel, Chemistry  
19 Panel, Electrolyte Panel, Coagulation Group, C-Reactive Protein, TSH, Folate, Vitamin B12  
20 and Urine Macro Panel (with Urine Microscopy if abnormal Macro Panel).  
21

22 At ICL, serum, plasma, buffy coat, whole blood, urine and saliva samples are processed and  
23 stored at baseline and annually thereafter for future biomarker exploration. Samples for  
24 biobanking are collected between 9-11.30am and following an overnight fast; and are stored at  
25 the ICL purpose-built -80°C biobank for future analyses. All samples are processed within two  
26 hours of collection, as per guidelines on biomarker pre-processing [29]. Planned analyses  
27 include untargeted metabolite and proteome profiling, to generate novel targets for future  
28 hypothesis-testing and biomarker discovery studies.  
29

30 CSF biomarkers: For those participants not receiving A $\beta$  PET, CSF samples were collected  
31 during screening and analyses for AD-related markers including beta-amyloid, total tau and  
32 phosphorylated tau. The A $\beta$  data was used for determination of enrolment eligibility, and in  
33 addition to the tau data, will be useful for disease modelling and staging of pre-clinical AD per  
34 NIA-AA criteria [2]. At ICL, additional aliquots of CSF samples are stored in the -80°C  
35 biobank for future analyses, which may include the exploration of putative biomarkers of AD  
36 pathophysiology as they arise in the literature.  
37

38 Genetic outcomes: Whole blood is collected in EDTA tubes for extraction of genomic DNA  
39 (gDNA) using standard methods. gDNA were thus isolated via commercially available kit  
40 following manufacturer instructions (QIAGEN QIASymphony DSP DNA Mini Kits or Promega  
41 Maxwell RSC Whole Blood DNA Kit). Both kits facilitate automated magnetic bead-based  
42 extractions that successfully extract DNA from Human Whole Blood samples with good  
43 quantitation and purity assessments. The QPS validated pyrosequencing genotyping assays for  
44  
45  
46  
47  
48  
49  
50  
51  
52  
53  
54  
55  
56  
57  
58  
59  
60

1  
2  
3 *APOE* codon 112T>C and codon 158C>T polymorphic variants were used to genotype  
4 participant's gDNA samples and identify *APOE* ε4 Carriers and *APOE* ε4 Non-Carriers status.  
5 By interrogating these two polymorphic variants, we identified the three *APOE* alleles: *APOE*  
6 ε2(TGC 112, TGC 158), *APOE* ε3 (TGC 112, CGC 158), and *APOE* ε4 (CGC 112, CGC 158).  
7 *APOE* genotype status has been determined for the enrolled cohort. A genome-wide-analysis  
8 study is under-way and data expected to be available during the study. At ICL, whole blood is  
9 also collected in a PAXgene® Blood RNA tube containing reagent for stabilization of  
10 intracellular RNA, and stored -80°C. These samples will be used for future genetic analyses.  
11  
12  
13  
14  
15  
16

### 17 ***Medical History and Clinical examinations (Physical and neurological examination)***

18  
19  
20 A thorough medical history was obtained including an evaluation of all body systems (ENT,  
21 ophthalmic, musculoskeletal, gastrointestinal, urinary, respiratory, renal, cardiovascular,  
22 dermatological) with an emphasis on relevant medical history (e.g. neurological, psychiatric,  
23 substance abuse, endocrine and metabolic). Safety and compatibility for neuroimaging were  
24 further ensured prior to the procedure.  
25  
26  
27  
28

29  
30  
31 Clinical examination included General Physical examination and a separate comprehensive  
32 Neurological Physical examination. The General Physical examination assessment included:  
33 General appearance, Dermatologic (including Mucous Membranes), Ear, nose, throat (ENT),  
34 Cardiovascular, Respiratory, Abdomen, Lymph Nodes, Musculoskeletal and any other  
35 findings. At Neurological Examination, Mental status, Cranial nerves, Motor (strength), Tone,  
36 Involuntary movements, Coordination (Finger-nose, Gait, Postural reflexes and Heel to shin),  
37 Sensation (Proprioception, Cold, Light touch), Deep tendon reflexes, Plantar reflexes and  
38 presence of other neurological signs (e.g. tremor) were assessed.  
39  
40  
41  
42

### 43 ***Safety reporting***

44  
45  
46 During the whole course of the study, new medical conditions and changes in medication were  
47 assessed at every site visit. All adverse events (serious and non-serious) were documented and  
48 reported according to the same protocol procedures applied in the main CHARIOT:PRO Main  
49 Study [11]. Briefly, serious and non-serious events that occur from inception of participation  
50 all through to completion of last study-related procedure are captured and recorded for all  
51 participants. Events are judged as serious if fatal, immediately life-threatening; require  
52 hospitalization or prolonging of existing hospitalization; permanently (or significantly)  
53 disabling; a congenital anomaly or birth defect (in an offspring); or medically significant.  
54 Further data recorded for each suspected adverse event included the description (signs and  
55  
56  
57  
58  
59  
60

1  
2  
3 symptoms or diagnosis), seriousness criteria, severity rating, duration (onset and resolution  
4 date), actions taken and outcome.  
5  
6  
7  
8  
9

### 10 **Study participant and public involvement**

11 The ICL (via CHARIOT register) and EDI team have established Research volunteer panels  
12 consisting of lay members who met on an ad-hoc basis to support study development during  
13 the planning stage. These panels provided feedback on study design, procedures and  
14 dissemination for lay audiences. A newsletter is provided to study participants with updates  
15 regarding recruitment, study milestones and any important changes to the Protocol.  
16  
17  
18  
19  
20

21 CPSS participants further provide feedback on the experience of research participation at the  
22 different study visits, to ensure that their perspectives are represented in decision-making about  
23 the future of the project and to advise on planned study activities, including dissemination  
24 plans. Annual participant seminars are conducted for dissemination of study results and  
25 discussion of future plans. A newsletter is provided to study participants quarterly for study  
26 updates, as well as future plans. Participant input and feedback on volunteer experiences is  
27 typically encouraged for inclusion in the newsletter.  
28  
29  
30  
31  
32  
33

### 34 **Ethical and regulatory considerations**

35 To ensure the quality and integrity of research, CPSS is conducted in accordance with GCP  
36 Guidelines, GPPs issued by ISPE, applicable national guidelines, and to the Declaration of  
37 Helsinki 2013, as modified by the 52nd World Medical Assembly (WMA), Edinburgh,  
38 Scotland, 2000, and clarified by the WMA General Assembly, Washington 2002 and Tokyo  
39 2004. The study has received approval from the National Research Ethics Service (NRES)  
40 Committee London Central (reference 15/LO/0711 [IRAS 140764]), as well as independent  
41 ethics review by committees from the local sites.  
42  
43  
44  
45  
46  
47  
48

49 Informed consent: Formal informed consent is taken using an informed consent form (ICF)  
50 from both participant and study partners before participation in the study. Given the possibility  
51 that participants might lose mental capacity during the study; it was recommended at the outset  
52 of participation that the participant identified a Legally Authorized Representative (LAR). A  
53 LAR may include the spouse, a person specifically appointed to take care of the legal interests  
54 of the participant, an individual with guardianship, and a health care proxy, who provides  
55 consenting for research studies which is within the legal scope of the proxy's delegated  
56  
57  
58  
59  
60

responsibilities (according to local applicable laws). The LAR must have the cognitive and mental capacities (as determined by the site Investigator) enabling him/her to understand the procedures, risks, and benefits involved with the study. The consent was given, and the form signed, at the initial visit or at follow-up visits at the study sites, based on the choice of the participant, and, where necessitated, on the choice of the LAR.

Duty of care: As part of the duty of care during the study, all clinically relevant information is shared with study participants where relevant and, with participant's consent, communicated to the GP for medical follow-up. The clinically relevant findings shared included systemic hypertension and significant changes in cognitive assessments where the investigator felt they were relevant.

Confidentiality: Participant confidentiality is strictly maintained. Each participant is assigned a unique participant identifier upon study enrolment, which is used for all subsequent data analysis and reporting. Participants' National Health Service (NHS) numbers are collected and stored in keeping with industry standards for encryption/data protection, allowing for subsequent data collection from electronic health records in primary or secondary care within NHS. This data collection only occurs following NRES approval. All parties ensure that participant personal data is not included on any study forms, reports, publications, or in any other disclosures, except where required by law. The Investigators in compliance with Federal regulations, other applicable laws and International Conference on Harmonization (ICH) GCP Guidelines keep documents that are not for submission to the Sponsor and/or its designee (e.g, signed ICFs and Participant Information Sheets) in strict confidence. In accordance with regulations in the UK, participants are informed about data handling procedures.

### **Data management, analysis, and dissemination plans**

**Data Management:** The CPSS is conducted in accordance with Good Clinical Practice (GCP) Guidelines as such data is recorded and stored in a way that could be verified and reported in an accurate manner. All essential documents are filed in the Trial Master File/Investigator Site File. Source documents are kept in both paper and electronic formats. The main Electronic Data Capture system used in the current study is Medidata Rave. Both paper and electronic data are subject to daily and monthly internal audits based on Standard Operating Procedures (SOPs). In addition, the Investigator Site Files, paper source documentation and electronic source data are routinely monitored to maintain data accuracy collection to the highest degree.

1  
2  
3 **Statistical Analysis:** Assuming the 3.5-year change from baseline in the G-PACC score has a  
4 standard deviation of 2.4 for the A $\beta$  positive participants [30], a sample size of n = 250 with a  
5 3.5-year dropout rate of 31% (i.e., 10%/year) ensures the 95% confidence interval (CI) for the  
6 3.5-year mean change in G-PACC score in A $\beta$  positive participants to be no wider than 0.72,  
7 assuming that the sample mean follows a Gaussian distribution. Analysis of change in G-PACC  
8 and RBANS over time will be performed with mixed models for repeated measures (MMRM)  
9 which assumes that missing data due to dropout are missing-at-random (MAR). The robustness  
10 of the analysis with respect to deviations from the MAR assumption will be evaluated.  
11 Analyses of the accruing results may be performed periodically while the study is ongoing.  
12 Analyses will generally be descriptive, but inferential analyses might be performed as needed.  
13 Potential unblinded interim analyses include:  
14  
15  
16  
17  
18  
19  
20  
21

22 (i) Analyses for baseline characterization of participants.

23 (ii) Analyses for determining longitudinal change in study endpoints once the last ongoing  
24 subject completes the Month 12, Month 24, and Month 36 visits. These analyses will include  
25 descriptive statistics (n, mean, standard deviation) and/or proportions for the A $\beta$  positive and  
26 negative groups, but the A $\beta$  status of individual participants will remain blinded.  
27  
28  
29  
30  
31  
32

## 33 DISCUSSION

34  
35  
36 With the pre-clinical disease stages being increasingly recognized as the best timing for  
37 intervention, it is paramount that trial evaluations are sensitive enough to detect and track  
38 cognitive, functional and biological changes emerging in these stages while also  
39 possessing sufficient efficacy to detect therapeutic effects for drug trials. Furthermore, there is  
40 an urgency to identify robust and sensitive predictors of clinical progression in order to estimate  
41 individual risks for clinical AD and develop and apply therapeutic strategies prior to emergence  
42 of clinically evident AD dementia. Although an ambitious project, some limitations of this  
43 work are worth mentioning. The amyloid positivity rate is low and due to a need for an equal  
44 number of participants in each group (amyloid positive; amyloid negative), a high number of  
45 participants (78.6%) were excluded from the longitudinal follow-up phase. As a mitigating  
46 measure, enrichment criteria were introduced, with requirement of first-degree family history  
47 in volunteers aged 60-65 years old. The conduct of the study at only two sites is not typical of  
48 multi-site international trials; on the other hand, this minimizes several sources of variability  
49 that are independent of aging and incipient Alzheimer's disease (e.g., inter-rater variability and  
50  
51  
52  
53  
54  
55  
56  
57  
58  
59  
60



1  
2  
3 differences in psychometric equivalence among different translations). It could be argued that  
4 the cognitive battery set may not be sensitive in predicting AD in healthy older adults, since  
5 these mostly tax modalities associated with AD dementia diagnostic criteria. Nonetheless, the  
6 high frequency (quarterly) follow-up of participants will facilitate determination of those  
7 assessments most sensitive for identifying the earliest signs and symptoms of AD-dementia  
8 and offers an opportunity to assess other performance parameters (e.g. qualitative errors, lack  
9 of practice effect; speed-accuracy trade-offs) that may indicate changes in cognitive and/or  
10 cerebral integrity in the lead up to AD dementia [31]. Similarly, other assessments of physical  
11 health pertinent to AD risk, such as gait, hearing, or dental health are not included in our study.  
12 However, we do collect extensive medical history information at baseline and follow-ups that  
13 includes clinical abnormalities (e.g. mobility issues; hearing impairment) that may be useful in  
14 our analyses.  
15  
16  
17  
18  
19  
20  
21  
22  
23  
24  
25

26 The CPSS contributes towards this global agenda of AD-dementia prevention. The study  
27 features detailed and frequent clinical and cognitive assessments in a deeply phenotyped,  
28 presymptomatic cohort of older adults. An overall aim of the study is to prospectively compare  
29 changes in cognition, and other clinical measures, between individuals with presence of  
30 pathological levels of brain A $\beta$  detected in PET scans or CSF and those without such evidence.  
31 CPSS also introduces a novel cognitive composite, the G-PACC, as a possible endpoint for  
32 future clinical trials. In this way, CPSS will expand upon prior retrospective investigations of  
33 proposed cognitive composites [30], by prospectively investigating the longitudinal change of  
34 the components of the G-PACC composite. The performance of the G-PACC to detect effects  
35 will be compared against another cognitive composite and its subtests, the RBANS. The  
36 addition of the RBANS subtests, alongside other clinical data, will allow for the exploration of  
37 novel cognitive risk profiles for the progression of future AD. The baseline data will determine  
38 which measures are most sensitive for predicting longitudinal AD-related cognitive decline,  
39 informing future screening methods for clinical trials. The study includes both patient and  
40 proxy-versions of functional interviews, such as the CFI and ADCS-ADL, to investigate  
41 longitudinal changes in everyday functioning in preclinical-AD individuals alongside cognitive  
42 decline and clinical characteristics. Dietary patterns and other lifestyle variables will also be  
43 assessed to consider the impact of environmental exposures on AD development. Therefore,  
44 the CPSS will also allow for the exploration of environmental and lifestyle predictors of  
45 cognitive decline and impairment.  
46  
47  
48  
49  
50  
51  
52  
53  
54  
55  
56  
57  
58  
59  
60

1  
2  
3 The uniqueness of this study lies in its breadth and frequency (every 3 months) of assessments,  
4 as well as the planned explorations and comparisons of proposed cognitive composites for AD  
5 detection and tracking. The prolonged and detailed follow-up data offers opportunities for  
6 precise disease modelling and the evaluation of several methodological controversies within  
7 clinical trial design, such as the influence of practice effects on cognitive performance, in  
8 addition to mechanisms of reserve and resilience against cognitive senescence.  
9

10  
11  
12  
13  
14 To date, CPSS has successfully completed its enrolment of 519 participants across two UK  
15 research sites, from 2,451 screened volunteers. Next steps in CPSS's milestones include the  
16 exploration of the baseline data for initial comparative analyses between stratified participant  
17 groups. The CPSS will continue as a multinational and multidisciplinary collaboration between  
18 industry, academia and the NHS to promote greater understanding of the etiology of AD  
19 pathological attributes and symptom development, and champion the search for effective  
20 preventative therapies. Future plans include study extension to at least 4.5 years, at the ICL  
21 site, with addition of Tau-PET and follow-up structural MRI, and extensive state-of-art fluid  
22 biomarker discovery explorations at multiple timepoints.  
23  
24  
25  
26  
27  
28  
29  
30  
31

### 32 **Acknowledgments**

33  
34  
35 The authors wish to thank the participants who continue to volunteer their time and  
36 commitment towards the CPSS. We thank the staff at various sites who assist in the collection  
37 of biological, cognitive and other clinical data, and we thank the Sponsor for funding this work.  
38 Imperial College London is grateful for support from the NIHR NW London Applied Research  
39 Collaboration.  
40  
41  
42  
43  
44  
45

### 46 **References**

- 47  
48 1. Alzheimer's Disease, I., World Alzheimer's Report 2019 Attitudes to Dementia.
- 49  
50 2. Jack, C.R., Jr., et al., NIA-AA Research Framework: Toward a biological definition of  
51 Alzheimer's disease.  
52  
53
- 54  
55 3. Papp, V.K., et al., Clinical meaningfulness of subtle cognitive decline on longitudinal testing  
56 in preclinical AD.  
57  
58  
59  
60

- 1  
2  
3  
4 4. Sperling, R.A., et al., Toward defining the preclinical stages of Alzheimer's disease:  
5 Recommendations from the National Institute on Aging-Alzheimer's Association workgroups  
6 on diagnostic guidelines for Alzheimer's disease.  
7
- 8  
9 5. Dubois, B., et al., Preclinical Alzheimer's disease: Definition, natural history, and diagnostic  
10 criteria.  
11
- 12  
13 6. Jansen, W.J., et al., Prevalence of cerebral amyloid pathology in persons without dementia:  
14 a meta-analysis.  
15
- 16  
17 7. Jack, C.R., Jr., et al., Age-specific and sex-specific prevalence of cerebral beta-amyloidosis,  
18 tauopathy, and neurodegeneration in cognitively unimpaired individuals aged 50-95 years: a  
19 cross-sectional study.  
20  
21
- 22  
23 8. Morris, J.C., et al., Pittsburgh compound B imaging and prediction of progression from  
24 cognitive normality to symptomatic Alzheimer disease.  
25
- 26  
27 9. Doraiswamy, P.M., et al., Amyloid-beta assessed by florbetapir F 18 PET and 18-month  
28 cognitive decline: a multicenter study.  
29
- 30  
31 10. Kawas, C.H., et al., Amyloid imaging and cognitive decline in nondemented oldest-old: the  
32 90+ Study.  
33
- 34  
35 11. Udeh-Momoh, C., et al., Prospective Evaluation of Cognitive Health and Related Factors  
36 in Elderly at Risk for Developing Alzheimer's Dementia: A Longitudinal Cohort Study.  
37
- 38  
39 12. Randolph, C., et al., The Repeatable Battery for the Assessment of Neuropsychological  
40 Status (RBANS): preliminary clinical validity.  
41
- 42  
43 13. Beffert, U., et al., Apolipoprotein E and  $\beta$ -amyloid levels in the hippocampus and frontal  
44 cortex of Alzheimer's disease subjects are disease-related and apolipoprotein E genotype  
45 dependent.  
46  
47
- 48  
49 14. Nalbantoglu, J., et al., Predictive value of apolipoprotein E genotyping in Alzheimer's  
50 disease: Results of an autopsy series and an analysis of several combined studies.  
51
- 52  
53 15. Yamazaki, Y., et al., Apolipoprotein E and Alzheimer disease: pathobiology and targeting  
54 strategies.  
55
- 56  
57 16. Wanis, H., The CHARIOT Register: a primary care-based recruitment register for research  
58 into dementia and healthy ageing.  
59  
60

17. Larsen, M., et al., Development of the CHARIOT Research Register for the Prevention of Alzheimer's Dementia and Other Late Onset Neurodegenerative Diseases.
18. Roberts, R.O., et al., Prevalence and Outcomes of Amyloid Positivity Among Persons Without Dementia in a Longitudinal, Population-Based Setting.
19. Randolph, C., The RBANS manual.
20. Hammers, D., et al., Reliability of repeated cognitive assessment of dementia using a brief computerized battery.
21. Delis, D.C., et al., Reliability and validity of the Delis-Kaplan Executive Function System: an update.
22. Ritchie, K., et al., COGNITO: Computerized Assessment of Information Processing.
23. Ferris, S.H., et al., ADCS Prevention Instrument Project: overview and initial results.
24. Weintraub, S., et al., Measuring cognition and function in the preclinical stage of Alzheimer's disease. *Alzheimer's & dementia (New York, N. Y.)*, 2018. 4: p. 64-75.
25. Grober, E., K. Ocepek-Welikson, and J.A. Teresi, The Free and Cued Selective Reminding Test: evidence of psychometric adequacy.
26. Wechsler, D., Wechsler Memory Scale—Fourth Edition.
27. Wechsler, D., Wechsler Adult Intelligence Scale—Fourth Edition.
- 28 Folstein, M.F., S.E. Folstein, and P.R. McHugh, "Mini-mental state". A practical method for grading the cognitive state of patients for the clinician.
29. O'Bryant, S.E., et al., Guidelines for the standardization of preanalytic variables for blood-based biomarker studies in Alzheimer's disease research.
30. Donohue, M.C., et al., The preclinical Alzheimer cognitive composite: measuring amyloid-related decline.
31. Thomas, K.R., et al., Using Neuropsychological Process Scores to Identify Subtle Cognitive Decline and Predict Progression to Mild Cognitive Impairment. *J Alzheimers Dis*, 2018. 64(1): p. 195-204.
32. Nelson, H.E. and J. Willison, The National Adult Reading Test (NART).
33. Hughes, C.P., et al., A new clinical scale for the staging of dementia.

1  
2  
3 34. Walsh, S.P., et al., ADCS Prevention Instrument Project: the Mail-In Cognitive Function  
4 Screening Instrument (MCFSI).  
5

6  
7 35. Galasko, D., et al., ADCS Prevention Instrument Project: assessment of instrumental  
8 activities of daily living for community-dwelling elderly individuals in dementia prevention  
9 clinical trials.  
10  
11  
12  
13  
14

#### 15 **Author Statement:**

16  
17 Prof Middleton served as the ICL study site principal investigator. Prof Ritchie served as the  
18 EDI study site principal investigator. Dr. Udeh-Momoh served as the lead author, with Dr  
19 Watermeyer as co-lead. Drs. Udeh-Momoh, Kivipelto, Car, Perneckzy, Price, de-Jager Loots  
20 and Ward were co-investigators at School of Public Health, Imperial College London. Dr  
21 Ritchie was co-investigator at Centre for Dementia Prevention, University of Edinburgh. All  
22 principal and co-investigators contributed to the study design, coordination, data acquisition,  
23 development and critical review of the manuscript. Dr. Scott and Mr Bracoud were employees  
24 at Bioclinica Inc., and developed the imaging protocol for the study, and participated in  
25 development and critical review of the manuscript. Prof Majeed co-developed the Chariot  
26 Register at School of Public Health, Imperial College London. Drs. Bassil, Robb, Cohn,  
27 Giannakopoulou, Kafetsouli, Chowdary and Ms Perera, Mclellan-Young, Lakey, Crispin and  
28 Curry were study investigators at School of Public Health, Imperial College London; Drs.  
29 Tamlyn Watermeyer and Natalia Reglinska-Matveyev were study investigators at Centre for  
30 Dementia Prevention, University of Edinburgh, and all contributed to data acquisition and  
31 review of the manuscript. Drs. Novak, Ropacki, Arrighi, Ketter, Raghavan, Saad and Brashear  
32 and Mr Fogle contributed to the study conception, protocol design, and development. Drs.  
33 Novak, Baker, Kacher, Saad and Mr Fogle contributed to study design and were responsible  
34 for data review, interpretation, and development of the manuscript. In addition, Dr. Arrighi was  
35 project pharmacoepidemiologist and Drs. Raghavan, Di and Kacher served as project  
36 biostatisticians, responsible for aspects of study design, statistical data analysis and statistical  
37 input. Dr Saad served as the unblinded statisticaian and imaging lead for the project.  
38  
39  
40  
41  
42  
43  
44  
45  
46  
47  
48  
49  
50  
51  
52  
53

54 All authors met ICMJE criteria and all those who fulfilled those criteria are listed as authors.  
55 All authors provided direction and comments on the manuscript, made the final decision about  
56 where to publish this protocol and approved the final draft and submission to this journal.  
57  
58  
59  
60

**Table 1: CHARIOT PRO study exclusionary findings post screening MRI**

- edema including amyloid-related imaging abnormalities (ARIA-E)
- hydrocephalus
- >25% age related white matter disease,
- frontal or temporal atrophy not typical of AD)
- history or evidence of a single prior hemorrhage >1 cm<sup>3</sup>
- multiple lacunar infarcts (2 or more) or
- single prior infarct >1 cm<sup>3</sup>
- cerebral contusion, encephalomalacia
- aneurysms, vascular malformations
- subdural hematoma
- space occupying lesions (eg, abscess or brain tumors such as meningioma >1cm)
- MRI features atypical of AD dementia.

\*Evidence of brain edema (eg, ARIA-E, vasogenic edema, hemosiderin deposits [HD] ≥10 mm in size or HD <10 mm in size but >10 in number) will be reviewed by the Sponsor's Medical Monitor to address plans for clinical evaluation and follow up as well as for potential inclusion/exclusion in the study.

**Table 2 CHARIOT PRO study Cognitive and Functional outcomes**

| Cognitive Outcome                                                               | Description                                                                                                                                                                                                                                                                                                                                                                                                                                                                                                | Assessment Schedule |
|---------------------------------------------------------------------------------|------------------------------------------------------------------------------------------------------------------------------------------------------------------------------------------------------------------------------------------------------------------------------------------------------------------------------------------------------------------------------------------------------------------------------------------------------------------------------------------------------------|---------------------|
| <i>Secondary outcomes</i>                                                       |                                                                                                                                                                                                                                                                                                                                                                                                                                                                                                            |                     |
| National Adult Reading Test (NART) [32]                                         | The NART is a word reading and pronunciation task comprising 50 English words with irregular grapheme-phoneme and stress rules. It is used to provide an estimate of premorbid intellectual functioning. Average administration time: 10 minutes.                                                                                                                                                                                                                                                          | BL                  |
| Neuropsychological Assessment Battery (NAB) Executive Function module (PAR Inc) | The executive function module comprises subtasks that examine planning, impulse control and psychomotor speed (through pen and paper mazes trials of increasing difficulty); judgement and decisional capacity (through questions pertaining to home safety, health and medical issues); concept formation, cognitive flexibility and response set (through a classification and categorization task) and fluency and generativity (through a word fluency task). Average administration time: 30 minutes. | M12, M24, M36       |

|                                                                                           |                                                                                                                                                                                                                                                                                                                                                                                                                                                                                                                                                                                                                                                                                                                                                                      |                                 |
|-------------------------------------------------------------------------------------------|----------------------------------------------------------------------------------------------------------------------------------------------------------------------------------------------------------------------------------------------------------------------------------------------------------------------------------------------------------------------------------------------------------------------------------------------------------------------------------------------------------------------------------------------------------------------------------------------------------------------------------------------------------------------------------------------------------------------------------------------------------------------|---------------------------------|
| Neuropsychological Assessment Battery (NAB) - Memory module (PAR, Inc)                    | The memory module comprises explicit learning, free recall, delayed recall and/or delayed recognition subtasks across verbal (list learning; story learning; medication instructions and name and address) and visual (shape learning) information. Average administration time: 45 minutes.                                                                                                                                                                                                                                                                                                                                                                                                                                                                         | M12, M24, M36                   |
| NEUROTRACK<br>( <i>Neurotrack Technologies, Inc</i> )                                     | Neurotrack is a declarative memory test based on digital eye tracking, administered on an IPAD. The task is a recognition memory test, relying on an individual's innate preference for novelty. In a familiarization phase, participants are presented with 2 identical images, side by side on the computer screen. This is followed by a test phase, in which a familiar image presented during the familiarization phase and a novel image are shown together. The ratio of time an individual gazes at the novel stimulus relative to the total viewing time constitutes a novelty preference score, with higher scores indicating superior declarative memory function and lower scores indicating impaired function. Average administration time: 10 minutes. | M3, M9, M15, M21, M27, M33, M39 |
| <i>Randomised tasks</i>                                                                   |                                                                                                                                                                                                                                                                                                                                                                                                                                                                                                                                                                                                                                                                                                                                                                      |                                 |
| Cognitive Drug Research Assessment System (CDRAS) (Bracket; United BioSource Corporation) | The CDRAS measures three domains of cognition: Attention (simple and choice reaction time, digit vigilance); Working memory (articulatory and spatial working memory); Episodic secondary memory (word recall, word recognition and picture recognition). Average administration time: 20 minutes.                                                                                                                                                                                                                                                                                                                                                                                                                                                                   | M3, M9, M15, M21, M27, M33, M39 |
| Cogstate (Cogstate, Inc) [20]                                                             | CogState consists of 4 tasks involving the presentation of playing cards. These tasks measure the functions of attention, processing speed, visual learning, and working memory using standard psychometric paradigms (ie, simple and choice reaction time, n-back and pattern separation learning). For the first assessment visit, M3, the task is administered twice within one session to control for task familiarity and practice effects. Average administration time: 15 minutes.                                                                                                                                                                                                                                                                            | M3, M9, M15, M21, M27, M33, M39 |

|                                                                                   |                                                                                                                                                                                                                                                                                                                                                                                                                                                                                                                                                                                                                                                                                                                                                                                                                                                                                                                                                                                            |                                        |
|-----------------------------------------------------------------------------------|--------------------------------------------------------------------------------------------------------------------------------------------------------------------------------------------------------------------------------------------------------------------------------------------------------------------------------------------------------------------------------------------------------------------------------------------------------------------------------------------------------------------------------------------------------------------------------------------------------------------------------------------------------------------------------------------------------------------------------------------------------------------------------------------------------------------------------------------------------------------------------------------------------------------------------------------------------------------------------------------|----------------------------------------|
| <p>Delis-Kaplan Executive Function System (Pearson) [21]</p> <p>ICL Site Only</p> | <p>The DKEFS is a paper and pencil measure of verbal and nonverbal executive functions and comprises 9 subtests. For this study, the Trail Making Test (visual attention and task switching) and Verbal Fluency (fluency and generativity) subtests are used. Total average administration time to complete these 2 subtests: 15 minutes.</p>                                                                                                                                                                                                                                                                                                                                                                                                                                                                                                                                                                                                                                              | <p>M3, M9, M15, M21, M27, M33, M39</p> |
| <p>Cognito [22]</p> <p>EDI Site Only</p>                                          | <p>COGNITO is a computerized task which assesses reaction time, primary and working memory (an articulation subtest further permitting identification of problems related to the articulatory loop), visuospatial and verbal secondary memory (with free, cued and multiple choice paradigms), implicit learning (priming), language skills (word and syntax comprehension, naming, verbal fluency), functional and semantic categorization of visual data (visual reasoning and form perception), focused and divided attention (visual and auditory modalities), and crystallized intelligence (vocabulary). Responses are made via a tactile screen which permits the recording of response latency (deducting reaction time provides an estimation of information processing time). Qualitative aspects of performance (perseveration, intrusions, visual field neglect) are also recorded. Administration time varies between 45- to 60-minute, depending on level of impairment.</p> | <p>M3, M9, M15, M21, M27, M33, M39</p> |
| <p><b>Functional Outcomes</b></p>                                                 | <p><b>Description</b></p>                                                                                                                                                                                                                                                                                                                                                                                                                                                                                                                                                                                                                                                                                                                                                                                                                                                                                                                                                                  | <p><b>Assessment Schedule</b></p>      |
| <p>Clinical Dementia Rating Scale [33]</p>                                        | <p>The CDR is used as a clinical staging instrument and is administered to both participant and study partner, using a semi-structured format. It assesses six domains: memory; orientation; judgment and problem solving; involvement in community affairs; home and hobbies; and personal care. Average administration time: 15-20 minutes with the study partner and 10-15 minutes with the participant, depending on the severity of cognitive impairment.</p>                                                                                                                                                                                                                                                                                                                                                                                                                                                                                                                         | <p>M12, M24, M36</p>                   |



|                                                                                           |                                                                                                                                                                                                                                                                                                                                                                                                                                                                                                                                                                                                                                                    |                      |
|-------------------------------------------------------------------------------------------|----------------------------------------------------------------------------------------------------------------------------------------------------------------------------------------------------------------------------------------------------------------------------------------------------------------------------------------------------------------------------------------------------------------------------------------------------------------------------------------------------------------------------------------------------------------------------------------------------------------------------------------------------|----------------------|
| <p>Cognitive Function Index [34]</p>                                                      | <p>The CFI is a modified version of the Mail-in Cognitive Function Screening Instrument (MCFSI, Walsh et al, 2006) a self- and informant-reported subjective outcome measure regarding activities of daily living. It includes 14 questions that assess participants' perceived ability to perform high level tasks in daily-life and their sense of overall cognitive functional ability, indicating whether or not there has been a change in performance (yes/no/maybe) compared to 1 year ago. Study participants and their study partners independently rate the participant's level of ability. Average administration time: 10 minutes.</p> | <p>M12, M24, M36</p> |
| <p>Alzheimer's disease Cooperative Study ADL prevention instrument (ADCS-ADL-PI) [35]</p> | <p>The ADCS-ADL-PI includes 15 subjectively rated questions related to activities of daily living and 5 questions related to physical functioning. <b>Error! Reference source not found.</b> Study participants and their study partners independently rate the study participant's level of ability. Partners are additionally asked to evaluate whether activities were completed less often, required more time to complete, and if errors were made performing the task. Physical functioning items are rated as yes or no. Average administration time: 10 minutes.</p>                                                                       | <p>M12, M24, M36</p> |

Note: BL – Baseline

### Figure 1 The CHARIOT:PRO Substudy Recruitment Pathway

a. Join Dementia Research; b. Scottish Primary Care Research Network; c. formerly Centre for Dementia Prevention; d. CHARIOT:PRO Main Study, e. formerly Neuroepidemiology and Ageing (NEA) Research Unit

### Figure 2 Screening and baseline assessment schedule

CDR=Clinical Dementia Rating; CSF=cerebrospinal fluid; MRI=magnetic resonance imaging; PACC=Preclinical Alzheimer Cognitive Composite; PET=positron emission tomography; RBANS=Repeatable Battery for the Assessment of Neuropsychological Status; CFI=Cognitive Function Index; ADCS-ADL-PI=ADCS-Activities of Daily Living - Prevention Instrument; NAB=Neuropsychological Assessment Battery; NART-National Adult Reading Test; GDS=Geriatric Depression Scale; STAI –State Trait Anxiety Inventory

### Figure 3: PET A $\beta$ Status Reading Workflow

SUVR = Standardized Uptake Value Ratio; Q = quantification of SUVR; FS = parcellation of cerebral structures based on Freesurfer imaging pipeline; QC = quality control assessment; VIS = result of visual assessment of amyloid PET; A $\beta$ + = assessed as A $\beta$  positive based on visual and/or quantitative (SUVR) analysis of amyloid PET

1  
2  
3  
4  
5  
6  
7  
8  
9  
10  
11  
12  
13  
14  
15  
16  
17  
18  
19  
20  
21  
22  
23  
24  
25  
26  
27  
28  
29  
30  
31  
32  
33  
34  
35  
36  
37  
38  
39  
40  
41  
42  
43  
44  
45  
46  
47



**Figure 1** The CHARIOT: PRO Substudy Recruitment pathway

a. Join Dementia Research; b. Scottish Primary Care Research Network; c. formerly Centre for Dementia Prevention  
 d. CHARIOT:PRO Main Study, e. formerly Neuroepidemiology and Ageing (NEA) Research Unit



Figure 2: PET Aβ Status Reading Workflow



Figure 3 Screening and baseline assessment schedule

CDR=Clinical Dementia Rating; CSF=cerebrospinal fluid; MRI=magnetic resonance imaging; PACC=Preclinical Alzheimer Cognitive Composite; PET=positron emission tomography; RBANS=Repeatable Battery for the Assessment of Neuropsychological Status; CFI=Cognitive Function Index; ADCS-ADL-PI=ADCS-Activities of Daily Living - Prevention Instrument; NAB=Neuropsychological Assessment Battery; NART-National Adult Reading Test; GDS=Geriatric Depression Scale; STAI –State Trait Anxiety Inventory

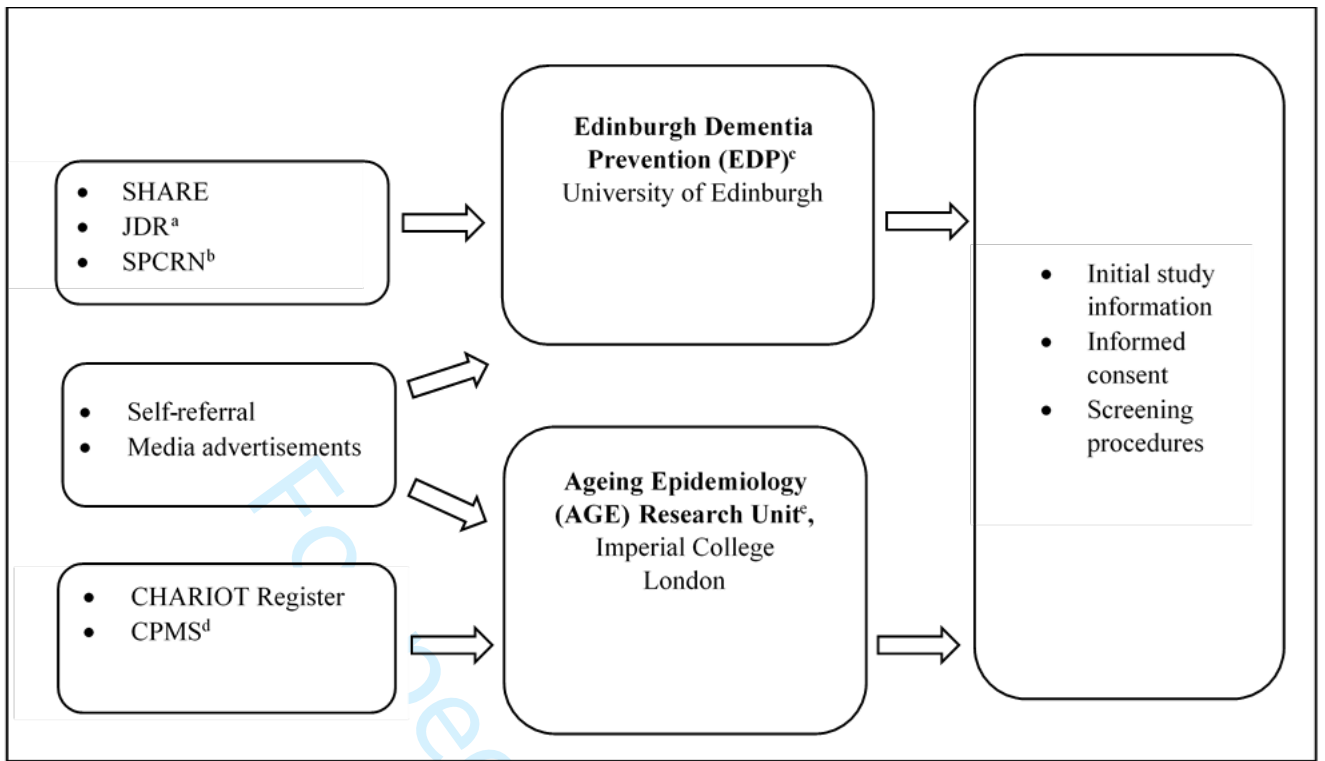

**Figure 1. The CHARIOT:PRO Recruitment Pathway**

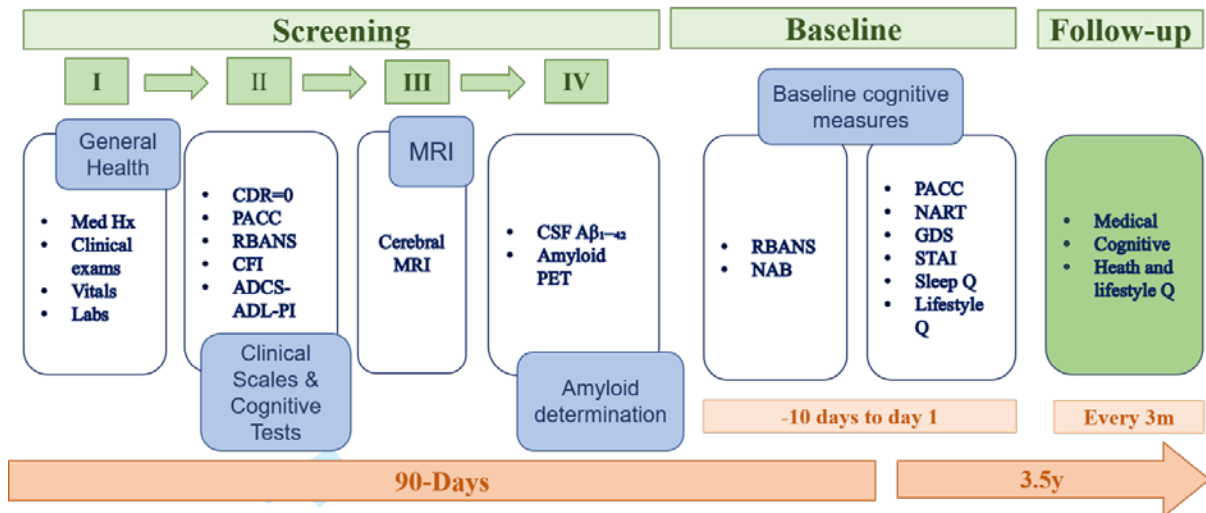

Figure 2 Screening and baseline assessment schedule

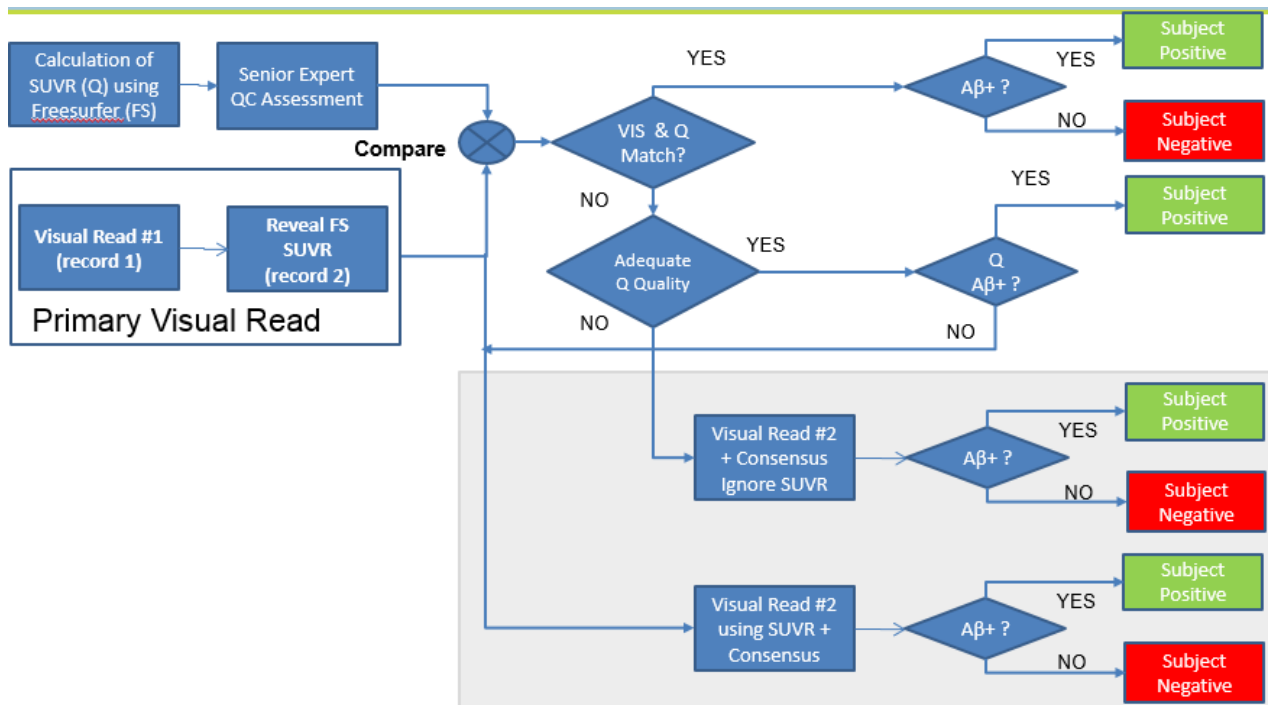

Figure 3: PET Aβ Status Reading Workflow



# BMJ Open

## Protocol of The Cognitive Health in Ageing Register: Investigational, Observational and Trial Studies in Dementia Research (CHARIOT): Prospective Readiness cOhort (PRO) SubStudy

|                               |                                                                                                                                                                                                                                                                                                                                                                                                                                                                                                                                                                                                                                                                                                                                                                                                                                                                                                                                                                                                                                                                                                                                                                                                                                                                                                                                                                                                                                                                                                                                                                                                                                                                                                                                                                                                                                                                                                                                                                                                                                                                                                                                       |
|-------------------------------|---------------------------------------------------------------------------------------------------------------------------------------------------------------------------------------------------------------------------------------------------------------------------------------------------------------------------------------------------------------------------------------------------------------------------------------------------------------------------------------------------------------------------------------------------------------------------------------------------------------------------------------------------------------------------------------------------------------------------------------------------------------------------------------------------------------------------------------------------------------------------------------------------------------------------------------------------------------------------------------------------------------------------------------------------------------------------------------------------------------------------------------------------------------------------------------------------------------------------------------------------------------------------------------------------------------------------------------------------------------------------------------------------------------------------------------------------------------------------------------------------------------------------------------------------------------------------------------------------------------------------------------------------------------------------------------------------------------------------------------------------------------------------------------------------------------------------------------------------------------------------------------------------------------------------------------------------------------------------------------------------------------------------------------------------------------------------------------------------------------------------------------|
| Journal:                      | <i>BMJ Open</i>                                                                                                                                                                                                                                                                                                                                                                                                                                                                                                                                                                                                                                                                                                                                                                                                                                                                                                                                                                                                                                                                                                                                                                                                                                                                                                                                                                                                                                                                                                                                                                                                                                                                                                                                                                                                                                                                                                                                                                                                                                                                                                                       |
| Manuscript ID                 | bmjopen-2020-043114.R2                                                                                                                                                                                                                                                                                                                                                                                                                                                                                                                                                                                                                                                                                                                                                                                                                                                                                                                                                                                                                                                                                                                                                                                                                                                                                                                                                                                                                                                                                                                                                                                                                                                                                                                                                                                                                                                                                                                                                                                                                                                                                                                |
| Article Type:                 | Protocol                                                                                                                                                                                                                                                                                                                                                                                                                                                                                                                                                                                                                                                                                                                                                                                                                                                                                                                                                                                                                                                                                                                                                                                                                                                                                                                                                                                                                                                                                                                                                                                                                                                                                                                                                                                                                                                                                                                                                                                                                                                                                                                              |
| Date Submitted by the Author: | 24-May-2021                                                                                                                                                                                                                                                                                                                                                                                                                                                                                                                                                                                                                                                                                                                                                                                                                                                                                                                                                                                                                                                                                                                                                                                                                                                                                                                                                                                                                                                                                                                                                                                                                                                                                                                                                                                                                                                                                                                                                                                                                                                                                                                           |
| Complete List of Authors:     | <p>Udeh-Momoh, Chinedu ; Imperial College London, Ageing Epidemiology Research Unit, School of Public Health; University of Bristol, Translational Health Sciences, Bristol Medical School<br/>Watermeyer, Tamlyn; Northumbria University; The University of Edinburgh, Edinburgh Dementia Prevention, Centre for Clinical Brain Sciences<br/>Price, Geraint; Imperial College London, Ageing Epidemiology Research Unit, School of Public Health<br/>de-Jaegar Loots, Celeste; Imperial College London, Ageing Epidemiology Research Unit, School of Public Health<br/>Reglinska-Matveyev, Natalia; The University of Edinburgh, Edinburgh Dementia Prevention, Centre for Clinical Brain Sciences<br/>Ropacki, Michael; Janssen Research and Development Fremont<br/>Ketter, Nzeera; Janssen Alzheimer Immunotherapy Research and Development LLC<br/>Fogle, Michael; Janssen Research and Development LLC<br/>Raghavan, Nandini ; Janssen Research and Development LLC<br/>Arrighi, Michael ; Janssen Research and Development Fremont<br/>Brashear, Robert; Janssen Alzheimer Immunotherapy Research and Development LLC<br/>Di, Jianing; Janssen Research and Development Shanghai, Department of Biostatistics<br/>Baker, Susan; Janssen Research and Development LLC<br/>Giannakopoulou, Parthenia; Imperial College London, Ageing Epidemiology Research Unit, School of Public Health<br/>Robb, Catherine; Imperial College London, Ageing Epidemiology Research Unit, School of Public Health<br/>Bassil, Darina; Imperial College London, Ageing Epidemiology Research Unit, School of Public Health<br/>Cohn, Martin; Imperial College London, Ageing Epidemiology Research Unit, School of Public Health<br/>McLellan-Young, Heather; Imperial College London, Ageing Epidemiology Research Unit, School of Public Health<br/>Crispin, Jennifer; Imperial College London, Ageing Epidemiology Research Unit, School of Public Health<br/>Lakey, Kristina; Imperial College London, Ageing Epidemiology Research Unit, School of Public Health<br/>Lisa, Curry; Imperial College London, Ageing Epidemiology Research</p> |

|                                    |                                                                                                                                                                                                                                                                                                                                                                                                                                                                                                                                                                                                                                                                                                                                                                                                                                                                                                                                                                                                                                                                                                                                                                                                                                                                                                                                                                                                                                                                                                                                                                                                                                                                                                                                                                                                                                                                                                                                                                                                                                                                                            |
|------------------------------------|--------------------------------------------------------------------------------------------------------------------------------------------------------------------------------------------------------------------------------------------------------------------------------------------------------------------------------------------------------------------------------------------------------------------------------------------------------------------------------------------------------------------------------------------------------------------------------------------------------------------------------------------------------------------------------------------------------------------------------------------------------------------------------------------------------------------------------------------------------------------------------------------------------------------------------------------------------------------------------------------------------------------------------------------------------------------------------------------------------------------------------------------------------------------------------------------------------------------------------------------------------------------------------------------------------------------------------------------------------------------------------------------------------------------------------------------------------------------------------------------------------------------------------------------------------------------------------------------------------------------------------------------------------------------------------------------------------------------------------------------------------------------------------------------------------------------------------------------------------------------------------------------------------------------------------------------------------------------------------------------------------------------------------------------------------------------------------------------|
|                                    | <p>Unit, School of Public Health<br/> Chowdary Seemulamoodi , Yellappa; Imperial College London, Ageing<br/> Epidemiology Research Unit, School of Public Health<br/> Kafetsouli, Dimitra; Imperial College London, Ageing Epidemiology<br/> Research Unit, School of Public Health<br/> Perera, Dinithi; Imperial College London, Ageing Epidemiology Research<br/> Unit, School of Public Health<br/> Car, Josip; Imperial College London, Department of Primary Care and<br/> Public Health, School of Public Health; Nanyang Technological University,<br/> Centre for Population Health Sciences (CePHaS), Lee Kong Chian School<br/> of Medicine<br/> Majeed, Azeem; Imperial College London, Department of Primary Care<br/> and Public Health, School of Public<br/> Ward, Heather; Imperial College London, Department of Epidemiology<br/> and Biostatistics, School of Public<br/> Ritchie, Karen; INSERM, University of Montpellier, Neuropsychiatry:<br/> Epidemiological and Clinical Research,; The University of Edinburgh,<br/> Edinburgh Dementia Prevention, Centre for Clinical Brain Sciences<br/> Perneckzy, Robert; Ludwig Maximilians University Munich, Department of<br/> Psychiatry and Psychotherapy, University Hospital ; Imperial College<br/> London, Ageing Epidemiology Research Unit, School of Public Health<br/> Kivipelto, Miia; Karolinska Institutet, Division of Clinical Geriatrics,<br/> Center for Alzheimer Research, Department of Neurobiology, Care<br/> Sciences and Society; Imperial College London, Ageing Epidemiology<br/> Research Unit, School of Public Health<br/> Scott, David; BioClinica Inc Newark California Office<br/> Bracoud, Luc; BioClinica Inc Lyon<br/> Saad, Ziad; Janssen Research and Development Fremont<br/> Novak, Gerald; Janssen Research and Development LLC<br/> Ritchie, Craig; The University of Edinburgh, Edinburgh Dementia<br/> Prevention, Centre for Clinical Brain Sciences<br/> Middleton, Lefkos; Imperial College London, Ageing Epidemiology<br/> Research Unit, School of Public Health</p> |
| <b>Primary Subject<br>Heading</b>: | Geriatric medicine                                                                                                                                                                                                                                                                                                                                                                                                                                                                                                                                                                                                                                                                                                                                                                                                                                                                                                                                                                                                                                                                                                                                                                                                                                                                                                                                                                                                                                                                                                                                                                                                                                                                                                                                                                                                                                                                                                                                                                                                                                                                         |
| Secondary Subject Heading:         | Neurology                                                                                                                                                                                                                                                                                                                                                                                                                                                                                                                                                                                                                                                                                                                                                                                                                                                                                                                                                                                                                                                                                                                                                                                                                                                                                                                                                                                                                                                                                                                                                                                                                                                                                                                                                                                                                                                                                                                                                                                                                                                                                  |
| Keywords:                          | EPIDEMIOLOGY, Dementia < NEUROLOGY, PREVENTIVE MEDICINE, Old<br>age psychiatry < PSYCHIATRY                                                                                                                                                                                                                                                                                                                                                                                                                                                                                                                                                                                                                                                                                                                                                                                                                                                                                                                                                                                                                                                                                                                                                                                                                                                                                                                                                                                                                                                                                                                                                                                                                                                                                                                                                                                                                                                                                                                                                                                                |
|                                    |                                                                                                                                                                                                                                                                                                                                                                                                                                                                                                                                                                                                                                                                                                                                                                                                                                                                                                                                                                                                                                                                                                                                                                                                                                                                                                                                                                                                                                                                                                                                                                                                                                                                                                                                                                                                                                                                                                                                                                                                                                                                                            |

SCHOLARONE™  
Manuscripts

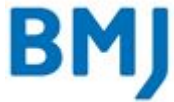

I, the Submitting Author has the right to grant and does grant on behalf of all authors of the Work (as defined in the below author licence), an exclusive licence and/or a non-exclusive licence for contributions from authors who are: i) UK Crown employees; ii) where BMJ has agreed a CC-BY licence shall apply, and/or iii) in accordance with the terms applicable for US Federal Government officers or employees acting as part of their official duties; on a worldwide, perpetual, irrevocable, royalty-free basis to BMJ Publishing Group Ltd ("BMJ") its licensees and where the relevant Journal is co-owned by BMJ to the co-owners of the Journal, to publish the Work in this journal and any other BMJ products and to exploit all rights, as set out in our [licence](#).

The Submitting Author accepts and understands that any supply made under these terms is made by BMJ to the Submitting Author unless you are acting as an employee on behalf of your employer or a postgraduate student of an affiliated institution which is paying any applicable article publishing charge ("APC") for Open Access articles. Where the Submitting Author wishes to make the Work available on an Open Access basis (and intends to pay the relevant APC), the terms of reuse of such Open Access shall be governed by a Creative Commons licence – details of these licences and which [Creative Commons](#) licence will apply to this Work are set out in our licence referred to above.

Other than as permitted in any relevant BMJ Author's Self Archiving Policies, I confirm this Work has not been accepted for publication elsewhere, is not being considered for publication elsewhere and does not duplicate material already published. I confirm all authors consent to publication of this Work and authorise the granting of this licence.

1  
2  
3 **Protocol of The Cognitive Health in Ageing Register: Investigational, Observational and**  
4 **Trial Studies in Dementia Research (CHARIOT): Prospective Readiness cOhort (PRO)**  
5 **SubStudy**  
6  
7

8  
9 DOCUMENT: Manuscript (Epidemiology)  
10

11 TARGET JOURNAL: British Medical Journal – Open Access (BMJOpen)  
12

13  
14 Abstract: 300 words  
15

16 Manuscript text: 5035 words (excluding references)  
17

18  
19 References: 33  
20

21 Tables and Figures: 2 tables and 3 figures  
22  
23  
24  
25  
26  
27  
28  
29  
30  
31  
32  
33  
34  
35  
36  
37  
38  
39  
40  
41  
42  
43  
44  
45  
46  
47  
48  
49  
50  
51  
52  
53  
54  
55  
56  
57  
58  
59  
60

1  
2  
3 Chinedu Udeh-Momoh, PhD<sup>1,2</sup>, Tamlyn Watermeyer, PhD<sup>3,4</sup>, Geraint Price, DClinPsych<sup>1</sup>,  
4 Celeste A de-Jager Loots, PhD<sup>1</sup>, Natalia Reglinska-Matveyev, PhD<sup>3</sup>, Michael T. Ropacki,  
5 PhD<sup>5</sup>, Michael Fogle, MSc<sup>7</sup>, Nzeera Ketter, MD<sup>6</sup>, Nandini Raghavan, PhD<sup>7</sup>, H. Michael  
6 Arrighi, PhD<sup>5</sup>, H. Robert Brashear, MD<sup>6</sup>, Jianing Di, PhD<sup>8</sup>, Susan Baker, PhD<sup>7</sup>, Parthenia  
7 Giannakopoulou, PhD<sup>1</sup>, Catherine Robb, PhD<sup>1</sup>, Darina T. Bassil, PhD<sup>1</sup>, Martin Cohn MD<sup>1</sup>,  
8 Heather McLellan-Young MSc.<sup>1</sup>, Jennifer Crispin BA.<sup>1</sup>, Kristina Lakey BSc.<sup>1</sup>, Lisa K. Curry  
9 MSc.<sup>1</sup>, Yellappa Chowdary Seemulamoodi MD<sup>1</sup>, Dimitra Kafetsouli, MD, PhD<sup>1</sup>, Dinithi  
10 Perera, LL.M<sup>1</sup>, Josip Car, MD<sup>9,10</sup>, Azeem Majeed, MD<sup>9</sup>, Heather A. Ward, PhD<sup>11</sup>, Karen  
11 Ritchie, PhD<sup>3,12</sup>, Robert Pernecky, Prof. MD<sup>1,13,14,15</sup>, Miia Kivipelto, MD, PhD<sup>1,16,17,18</sup>,  
12 David Scott, PhD<sup>19</sup>, Luc Bracoud, MSc<sup>20</sup>, Ziad Saad PhD<sup>5</sup>, Gerald Novak MD<sup>7\*</sup>, Craig  
13 Ritchie, MD, PhD<sup>3</sup> and Lefkos Middleton, MD<sup>1</sup>

14  
15  
16  
17  
18  
19  
20  
21  
22  
23 <sup>1</sup>Imperial College London, Ageing Epidemiology Research Unit, School of Public Health,  
24 London, W6 8RP, UK

25  
26  
27 <sup>2</sup>Translational Health Sciences, Bristol Medical School, University of Bristol, Bristol, UK

28  
29  
30  
31 <sup>3</sup>Edinburgh Dementia Prevention, Centre for Clinical Brain Sciences, University of  
32 Edinburgh, Edinburgh, UK

33  
34  
35  
36 <sup>4</sup>Department of Psychology, Faculty of Health and Life Sciences, Northumbria University,  
37 Newcastle, UK

38  
39  
40  
41  
42  
43 <sup>5</sup>Janssen Research & Development, LLC, Fremont, California, 94555, USA

44  
45  
46  
47  
48  
49 <sup>6</sup>Janssen Alzheimer Immunotherapy Research & Development, LLC, South San Francisco,  
50 California 94080, USA

51  
52  
53  
54  
55  
56  
57 <sup>7</sup>Janssen Research & Development, LLC, Titusville, NJ 08560, USA

58  
59  
60  
61  
62  
63  
64  
65  
66  
67  
68  
69  
70 <sup>8</sup>Janssen China Research and Development Center, Department of Biostatistics, Shanghai,  
71 China

72  
73  
74  
75  
76  
77  
78  
79  
80  
81  
82  
83  
84  
85  
86  
87  
88  
89  
90  
91  
92  
93  
94  
95  
96  
97  
98  
99  
100  
<sup>9</sup>Imperial College London, Department of Primary Care and Public Health, School of Public  
Health, London, W6 8RP, UK

<sup>10</sup>Centre for Population Health Sciences (CePHaS), Lee Kong Chian School of Medicine,  
Nanyang Technological University, 308232 Singapore, Singapore

1  
2  
3 <sup>11</sup>Imperial College London, Department of Epidemiology and Biostatistics, School of Public  
4 Health, London, W3 1PG, UK

5  
6  
7 <sup>12</sup>INSERM, University of Montpellier, Neuropsychiatry: Epidemiological and Clinical  
8 Research, Montpellier, France

9  
10  
11 <sup>13</sup>University Hospital, LMU Munich, Department of Psychiatry and Psychotherapy, 80336  
12 München, Germany

13  
14  
15 <sup>14</sup>German Center for Neurodegenerative Diseases (DZNE) Munich, 81377 München,  
16 Germany

17  
18  
19 <sup>15</sup>Munich Cluster for Systems Neurology (SyNergy), Munich, Germany

20  
21  
22 <sup>16</sup>Public Health Promotion Unit, National Institute for Health and Welfare (THL), Helsinki,  
23 Finland. [mia.kivipelto@ki.se](mailto:mia.kivipelto@ki.se).

24  
25  
26 <sup>17</sup>Division of Clinical Geriatrics, Center for Alzheimer Research, Department of  
27 Neurobiology, Care Sciences and Society, Karolinska Institutet, Stockholm, Sweden.

28  
29  
30 <sup>18</sup>Institute of Clinical Medicine, Neurology, University of Eastern Finland, Kuopio, Finland.

31  
32  
33 <sup>19</sup>Bioclinica Inc, Newark, CA 94560 USA

34  
35  
36 <sup>20</sup>Bioclinica Inc, Lyon, France

37  
38  
39  
40 \*Corresponding author: Gerald Novak, MD; Janssen Research & Development, LLC, 1125  
41 Trenton-Harbourton Rd., Titusville, NJ 08560, USA. E-mail: [gnovak1@its.jnj.com](mailto:gnovak1@its.jnj.com)

#### 42 43 44 45 46 **Trial Registration**

47  
48 The CHARIOT:PRO SubStudy is registered with [clinicaltrials.gov](http://clinicaltrials.gov) (NCT02114372). Notices  
49 of Protocol modifications will be made available through this trial registry.

#### 50 51 52 **Funding statement**

53  
54 This work was supported by Janssen Pharmaceuticals Research & Development, LLC  
55  
56  
57  
58  
59  
60

### Competing Interests Statement:

The study is funded by Janssen Research & Development, LLC. Michael T. Ropacki was formerly employee of Janssen and is an industry consultant. Gerald Novak, Susan Baker, H. Michael Arrighi, Michael Fogle, Keith Karcher, Ziad Saad and Nandini Raghavan are employees of Janssen Research & Development, LLC and own stock/stock options in the company. Nzeera Ketter and H. Robert Brashear are former employees of Janssen Research & Development, LLC and both own stock/stock options in the company. Jianing Di is an employee of Janssen China Research and Development Center and owns stock/stock options in the company. Lefkos Middleton served as principal study investigator at Imperial College of London (ICL) and has held consultancy agreements, in the last five years, with Eli Lilly, Astra Zeneca and Takeda and is National Coordinator for the TOMMORROW, Amaranth and Generation Clinical Studies; and does not hold any agreement with any of the funders in relation to patents, products in development relevant to this study or marketed products. Craig Ritchie served as principal study investigator at Edinburgh University (EDI), and has served as a consultant in the last five years for: Actinogen, Biogen, Roche Pharmaceuticals and Roche Diagnostics, Eisai, Abbott Pharmaceuticals, Eli Lilly, Kyowa Kirin, Signant Health, Merck and Nutricia. He is also the Chief Investigator and Co-coordinator of IMI-EPAD which is a public-private partnership of 39 partners [www.ep-ad.org](http://www.ep-ad.org).

Chinedu Udeh-Momoh, Josip Car, Robert Pernecky, Geraint Price, Celeste de-Jager Loots, Heather Ward and Miia Kivipelto served as co-principal study investigators at ICL for Janssen Research & Development, LLC and all declare no conflict of interest. Josip Car's and Azeem Majeed's posts at ICL are in part supported by the NIHR NW London Applied Research Collaboration. Catherine Robb, Darina Bassil, Martin Cohn, Parthenia Giannakopoulou, Dimitra Kafetsouli, Yellappa Chowdary-Seemulamoodi, Dinithi Perera, Lisa Curry, Kristina Lakey, Heather McLellan-Young, Jennifer Crispin and Azeem Majeed were study investigators at ICL and declare no conflict of interest. Karen Ritchie served as co-principal study investigator at EDI for Janssen Research & Development, LLC and declares no conflict of interest. Tamlyn Watermeyer and Natalia Reglinska-Matveyev were study investigators at EDI and declare no conflict of interest. David Scott and Luc Bracoud are employees of Bioclinica Inc. and declare no competing interests.

## ABSTRACT

**Introduction:** The CHARIOT:PRO SubStudy (CPSS), sponsored by Janssen Pharmaceutical Research & Development LLC, is an Alzheimer's disease (AD) biomarker enriched observational study that began 3<sup>rd</sup> July 2015 CPSS aims to identify and validate determinants of AD, alongside cognitive, functional and biological changes in older adults with or without detectable evidence of AD pathology at baseline.

**Methods and Analysis:** CPSS is a dual-site longitudinal cohort (3.5 years) assessed quarterly. Cognitively normal participants (60-85 years) were recruited across Greater London and Edinburgh. Participants are classified as high, medium (amnesic or non-amnesic) or low risk for developing mild cognitive impairment–Alzheimer's disease (MCI-AD) based on their Repeatable Battery for the Assessment of Neuropsychological Status (RBANS) performance at screening. Additional AD-related assessments include: a novel cognitive composite, the Global Preclinical Alzheimer's Cognitive Composite (G-PACC), brain magnetic resonance imaging (MRI) and positron emission tomography (PET) and cerebrospinal fluid (CSF) analysis. Lifestyle, other cognitive and functional data, as well as bio-samples (blood, urine, and saliva) are collected. Primarily, study analyses will evaluate longitudinal change in cognitive and functional outcomes. Annual interim analyses for descriptive data occur throughout the course of the study, although inferential statistics are conducted as required.

**Ethics and Dissemination:** CPSS received ethical approvals from the London - Central Research Ethics Committee (15/LO/0711) and the Administration of Radioactive Substances Advisory Committee (RPC 630/3764/33110) The study is at the forefront of global AD prevention efforts, with frequent and robust sampling of the well-characterised cohort, allowing for detection of incipient pathophysiological, cognitive and functional changes that could inform therapeutic strategies to prevent and/or delay cognitive impairment and dementia. Dissemination of results will target the scientific community, research participants, volunteer community, public, industry, regulatory authorities and policymakers. Upon study completion, and following a predetermined embargo period, CPSS data is planned to be made accessible for analysis to facilitate further research into the determinants of AD pathology, onset of symptomatology and progression.

**Key Words:** Epidemiology; Neurology; Psychiatry; Dementia; Preventative Medicine



## STRENGTHS AND LIMITATIONS

### Strengths

- Prospectively-designed, high-powered longitudinal cohort of cognitively-healthy (at baseline) elders across the Alzheimer's pathological continuum followed up at high-throughput using biological, psycho-social, cognitive, behavioural and lifestyle measures
- Study adopts a unique cognition-based classification method for designating risk of MCI-AD development from baseline.

### Limitations:

- Given the low amyloid positivity rate and the requirement of an equal number of CPSS participants above and below threshold, a high number of participants (78.6%) were excluded from the longitudinal CPSS study.
- The conduct of the study at only 2 sites does not fit the model of a typical, multi-site international clinical trial.

## INTRODUCTION

**Background and Rationale:** The last few decades have witnessed unparalleled growth in aged populations. Hence, the global incidence and prevalence of Alzheimer's disease (AD), the most-common form of late-onset dementia, continue to increase exponentially, with numbers expected to exceed 150 million global cases by 2050 [1]. The paucity of any viable therapy for dementia prevention and/or disease modification necessitates a re-think of the conventional approach towards preventative research. Indeed, the AD field will benefit from concerted efforts for preventative strategies combining biomarker discovery studies with detailed validation of clinical characteristics as well as longitudinal explorations of associated pathologies and symptoms.

The asymptomatic stage of AD is characterized by biomarker evidence of amyloid- $\beta$  ( $A\beta$ ) deposition, as measured by either low cerebrospinal fluid (CSF)  $A\beta_{42}$  peptide concentrations or elevated tracer uptake on  $A\beta$  positron emission tomography (PET) scans [2]. Multiple studies have now reported that higher  $A\beta$  burden in cognitively normal (CN) individuals is associated with measurably poorer performance in neuropsychological tests [3]. The

1  
2  
3 accumulating longitudinal data also strongly suggest that evidence of abnormal levels of A $\beta$   
4 deposition in CN individuals increases the risk for cognitive decline and progression to mild  
5 cognitive impairment (MCI) and AD dementia [3]. The current consensus among members of  
6 the Alzheimer's scientific community is that these CN individuals with detectable pathogenic  
7 A $\beta$  represent an early stage on the AD continuum [2, 4, 5]. Indeed, a meta-analysis of 55 studies  
8 suggested that approximately 20% to 35% of study participants aged over 60 years without  
9 dementia symptoms are likely to have above-threshold pathogenic A $\beta$  pathology detected by  
10 PET [6], with numbers increasing to 90% by age 85 [7].

11  
12  
13  
14  
15  
16  
17  
18 Rate of cognitive decline in CN individuals with or without evidence of abnormal A $\beta$   
19 deposition can be measured using sensitive cognitive composite instruments. These measures  
20 focus on the cognitive domains affected earliest in AD, namely episodic memory and executive  
21 function, with decline noted as early as 7 to 10 years prior to the diagnosis of MCI or AD  
22 dementia [8-10]. Yet, gaps remain in our understanding of the exact predictors of AD  
23 pathological onset, accumulation and resultant development of clinical symptoms. There is a  
24 need to identify individuals at varying levels of risk for AD, prior to development of AD  
25 dementia. Such information would be useful to improve our understanding of the natural  
26 history of AD progression and identify opportunities for intervention.

27  
28  
29  
30  
31  
32  
33  
34 The CHARIOT:PRO program seeks to address such gaps via detailed explorations of the  
35 determinants of AD-related biological, clinical and cognitive changes. The previously-reported  
36 main study of 987 participants at ICL, conducted from 2013 to 2016 (following early  
37 termination by the study Sponsor) [11] was further adapted into a large prospective  
38 observational trial – The CHARIOT: PRO SubStudy (CPSS) aimed at enhancing the scientific  
39 robustness of the main study objectives with the addition of imaging and other AD-related  
40 assessment tools.

41  
42  
43  
44  
45  
46 Here we describe the protocol (from Amendment version 15, dated 15<sup>th</sup> Aug 2018) of this  
47 biomarker enriched CPSS featuring neuropsychological, functional, lifestyle, imaging and  
48 other biomarker assessments and the schedule for their collection. We provide an outline of the  
49 study design and a summary of the recruitment and screening process leading to the fully  
50 enrolled cohort of 519 cognitively unimpaired adults.

51  
52  
53  
54  
55  
56 **Objectives of the CPSS:** CPSS is a prospective dual-centre, UK cohort study that at its core  
57 aims to characterise deeply the clinico-biological attributes of the non-symptomatic AD stage  
58 in individuals at differing levels of risk for development of MCI and AD-dementia, based on  
59  
60

1  
2  
3 cognitive test scores at screening. CPSS participants thus could form a readiness cohort to be  
4 recruited onto future AD-dementia prevention trials.  
5

6  
7 Specifically, using data from participants with evidence of detectable A $\beta$  pathology versus  
8 those with below-threshold levels, the study will:  
9

- 10  
11 - Investigate the longitudinal change of the global and composite measures of the newly-  
12 developed Global Preclinical Alzheimer's Cognitive Composite (G-PACC) in  
13 comparison to the Repeatable Battery for the Assessment of Neuropsychological Status  
14 [RBANS, 12] and other study neuropsychological assessments, as well as  
15 psychometrically evaluate the test batteries  
16  
17 - Determine precise baseline predictors of longitudinal AD-related cognitive and  
18 functional decline, and clinical progression to improve future screening of participants  
19 most likely to develop MCI-AD/ AD dementia  
20  
21  
22  
23  
24  
25  
26  
27  
28  
29

## 30 **METHODS**

### 31 **Population**

32  
33 The CPSS participants are adults aged 60 to 85 years old (inclusive), residing in Greater  
34 London, South West England, Edinburgh and surrounding districts. Those included had  
35 documented evidence of A $\beta$  pathology (A $\beta$  positives: above-threshold brain A $\beta$  deposition on  
36 PET or below-threshold CSF A $\beta_{42}$  concentration), or evidence of below-threshold A $\beta$   
37 pathology (A $\beta$  negatives: below-threshold brain A $\beta$  deposition on PET or above-threshold CSF  
38 A $\beta_{42}$  concentration), and a baseline global Clinical Dementia Rating (CDR) score=0. CPSS  
39 participants were classified at screening as *high*, *medium-amnestic or non-amnestic*, or *low risk*  
40 for developing MCI due to AD (MCI-AD), based on cognitive test performance as described  
41 previously [11].  
42  
43  
44  
45  
46  
47  
48  
49  
50

### 51 **Study Design**

52  
53 The CPSS is a UK prospective observational study taking place across two sites (ICL and EDI).  
54 The study is planned to follow approximately 250 CN participants who are A $\beta$  positive and  
55 approximately 250 A $\beta$  negative CN control participants for up to three and a half years.  
56 Evidence of A $\beta$  pathology was assessed via CSF A $\beta_{42}$  except where lumbar puncture (LP) was  
57  
58  
59  
60

1  
2  
3 medically contraindicated or refused by participants, in which case A $\beta$  PET was permitted as  
4 an alternative method of determination of A $\beta$  status. CSF samples were tested with the Meso  
5 Scale Discovery (MSD) triplex (A $\beta_{38/40/42}$ ). A binary classification for A $\beta$  load was applied  
6 using a cut-off value for CSF A $\beta_{42} \leq 600$  ng/L. The cut-off for brain A $\beta$  PET via standardized  
7 uptake value ratio (SUVR) was based on three independent F18-radiolabeled amyloid tracers  
8 - florbetapir, flutemetamol, and florbetaben. A specific SUVR threshold (i.e. a cut-point) was  
9 used for each of the three radiotracers (Amyvid: 1.14 with whole-cerebellum as a reference  
10 region, Neuraceq: 1.20 with cerebellar grey matter, Vizamyl: 1.23 with whole cerebellum).  
11 Scans were reported as amyloid positive if the composite cortical SUVR value was above the  
12 defined tracer-specific threshold, and negative if less than or equal to the threshold value.  
13  
14  
15  
16  
17  
18  
19  
20

21 All study investigators, sponsor team and participants are blinded as to A $\beta$  status information,  
22 with the exception of an unblinded team member for verification of imaging and CSF A $\beta$   
23 information. Blinding was put in place to avoid bias for conducting, monitoring and  
24 interpreting results from the clinical assessments (except for research analysis purposes). The  
25 same double-blind is maintained for apolipoprotein E (*APOE*) genotype, in view of allele-  
26 specific positive correlation with A $\beta$  load [13-15]. A $\beta$  status and *APOE* genotype results were  
27 not disclosed to participants as the clinical value (i.e., diagnostic or predictive) of such a  
28 disclosure in a CN population is still unestablished. If clinical value is established from this or  
29 other studies, then amyloid and *APOE* genotype will be disclosed to participants, at the end of  
30 the study.  
31  
32  
33  
34  
35  
36  
37  
38

39 Numbers of A $\beta$  negative participants who passed screening assessments were deliberately  
40 controlled to ensure equivalency with number of eligible A $\beta$  positive participants. There was  
41 no deliberate effort to balance the groups by age or gender.  
42  
43  
44

## 45 **Study schedule**

### 46 *Participant recruitment*

47  
48  
49 At the ICL site, participants were recruited primarily from the CHARIOT Register, a well-  
50 established dementia prevention and prediction register of older adults without dementia who  
51 have provided consent to be contacted for relevant ageing research [16, 17]. Some participants  
52 transitioned directly to CPSS from the Main study, though most of these individuals had  
53 previously been recruited also from the CHARIOT Register. Additional methods of  
54 recruitment at the site, with very limited numbers of enrolled participants, included self-  
55 referrals and response from media advertisements. At the Edinburgh site, participants were  
56  
57  
58  
59  
60

1  
2  
3 recruited via SHARE (<https://www.registerforshare.org>), Join Dementia Research (JDR,  
4 <https://www.joindementiaresearch.nihr.ac.uk/>) and the Scottish Primary Care Research  
5 Network (SPCRN [http://www.nhsresearchscotland.org.uk/research-areas/primary-care/about-](http://www.nhsresearchscotland.org.uk/research-areas/primary-care/about-the-network)  
6 [the-network](http://www.nhsresearchscotland.org.uk/research-areas/primary-care/about-the-network)) (See Figure 1 for the participant recruitment pathway). Recruitment efforts  
7  
8 resulted in 1,914 individuals screened at ICL to enrol 409 participants, and 537 screened at  
9  
10 Edinburgh to enrol 110. Screened participants were not selected based on race/ethnicity or  
11  
12 gender, resulting in a predominance of participants of European ancestry (> 95%) and a slight  
13  
14 majority of women.  
15  
16

### 17 *Selection of study participants: summary of eligibility criteria*

18  
19  
20 The major exclusion criteria for CPSS include known familial autosomal dominant AD,  
21  
22 diagnosis of AD dementia, MCI, or any other degenerative brain disorder that is associated  
23  
24 with dementia at screening. Evidence of brain disease or other conditions leading to dementia,  
25  
26 other than AD-related structural pathologies were assessed centrally by blinded neuro-  
27  
28 radiologists via magnetic resonance imaging (MRI) during screening. Additionally, use of AD  
29  
30 pharmacological therapies, and evidence of psychiatric/cognitive disorders/other abnormalities  
31  
32 such as low vitamin B12 (specifically those with abnormal homocysteine and methylmalonic  
33  
34 acid), and linked to cognitive deficits are exclusionary. Further, history of first-degree family  
35  
36 member with diagnosed clinical AD was required for participants aged 60-65 years. This  
37  
38 measure was put in place to enrich the cohort for cerebral A $\beta$  positivity given typically lower  
39  
40 prevalence in asymptomatic young elders i.e. below 70 years of age [18], thereby effectively  
41  
42 minimizing screen failure rates. Following participants' consent, self-reported medical and  
43  
44 medication history was confirmed from full history provided by participants' general  
45  
46 practitioner (GP). Upon receipt of any medical information, current medical conditions and  
47  
48 past medical history was updated on source documents and subsequently on electronic data,  
49  
50 including medication, past and planned procedures. Medical summaries from GPs were used  
51  
52 to ascertain self-reported histories.

53  
54 During screening, participants whose cognitive performance on any RBANS Index fell more  
55  
56 than 1.5 standard deviations below the (age- and education-adjusted) population mean (based  
57  
58 on normative sample from [19]) were referred to an adjudication panel. This panel, comprised  
59  
60 of neurologists, psychiatrists and neuropsychologists, considered whether the low performance  
was likely to be attributable to undiagnosed cognitive impairment and, if so, excluded the  
participant from the study. These participants were contacted directly by the study team to

1  
2  
3 inform them of their exclusion. At that time, where any concerns were noted regarding their  
4 performance, the option to notify their GP with information about the study and their exclusion  
5 was offered.  
6  
7

### 8 9 *Screening schedule*

10  
11 The screening was usually completed in four separate visits within a 90-day window. On  
12 certain occasions, this timeline was extended up to 180 days to allow for treatment of transient  
13 conditions, laboratory retesting, and scheduling of other screening assessments. This allowed  
14 time for results to be received and evaluated against study eligibility criteria. Any clinically  
15 significant findings were passed on for follow-up to the participant's GP. Participants who  
16 were determined to have an active unstable illness, as defined by the inclusion/exclusion  
17 criteria, were excluded. Screening involved collection of demographic data which included  
18 age, ethnicity, education and occupational status. During screening, potential participants  
19 completed cognitive tests, the G-PACC and RBANS, and CDR including the study partner  
20 interview. A clinical evaluation (pulse, blood pressure, weight, head, waist & hip  
21 circumference, temperature (tympanic), physical and neurological examination) and clinical  
22 lab assessments were carried out to determine general health status. Participants not excluded  
23 at this stage then underwent a brain MRI. If MRI did not reveal exclusionary abnormalities  
24 (see Table 1), it was followed by an A $\beta$  assessment based on CSF analysis or brain PET scan.  
25 After the A $\beta$  determination, baseline assessments were undertaken at two consecutive visits  
26 where the RBANS (form A), G-PACC (form A) as well as the Neuropsychological Assessment  
27 Battery (NAB) Memory and Executive Function modules (form 1) and the National Adult  
28 Reading Test (NART) were administered alongside self-reported study questionnaires. Bio-  
29 samples were further collected for biomarker assessments. (See Figure 2 for schematic  
30 depiction of screening and baseline assessments).  
31  
32  
33  
34  
35  
36  
37  
38  
39  
40  
41  
42  
43  
44  
45

### 46 47 *Post-screening schedule*

48  
49 Following the baseline assessment, CPSS participants were randomized in a balanced 1:1:1  
50 ratio, stratified by A $\beta$  status and level of performance on the screening RBANS, to one of three  
51 supplemental neuropsychological tests namely: CogState Brief Battery [20], Cognitive Drug  
52 Research Assessment System, and either Delis-Kaplan Executive Function System [DKEFS,  
53 21, ICL only] or COGNITO [22, EDI only]. Participants who enrolled in the Substudy from  
54 the Main Study retained their previous Main Study-assigned randomized group. Participants  
55 are expected to attend study visits every quarter and will be followed up for a period of up to  
56  
57  
58  
59  
60

1  
2  
3 3.5 years. Due to the COVID-19 restrictions that were implemented in March 2020 in the UK,  
4 the CPSS was transitioned to virtual visits to allow continued longitudinal assessments. For  
5 further details on our strategy for operationalising this activity, please see [23]. As part of the  
6 general visits, we collect detailed information on all medical, especially Covid-related incidents  
7 including more recently information on Covid-19 vaccinations. These data are designated  
8 Covid-related within our database for easy identification of such cases.  
9  
10  
11  
12  
13

## 14 **Study outcomes and assessments**

### 15 *Primary neurocognitive outcomes*

16  
17  
18  
19 The primary outcomes of the CPSS are performance in two neurocognitive measures, the novel  
20 G-PACC and the RBANS.  
21  
22

23 The G-PACC: is a retrospectively and theoretically derived and validated measure, weighted  
24 towards episodic memory but including a timed executive function test and a global cognitive  
25 screening test [24]. For this study, the four PACC components include: the Free and Cued  
26 Selective Reminding Test -Immediate Recall [FCSRT-IR, 25], the Delayed Paragraph Recall  
27 score on a single administration of the Logical Memory story from the WMS – Revised [26],  
28 the WAIS-IV Coding subtest [26] and the MMSE [27]. Each component score is transformed  
29 into z-scores. These z-scores are summed to form the composite. The battery takes about 25  
30 minutes to administer. Alongside screening and baseline time points, alternating forms of the  
31 G-PACC are administered at the following time points: Months 6, 12, 18, 24, 30, 36, 42.  
32  
33  
34  
35  
36  
37  
38

39 The RBANS: is a 25-minute composite battery with 12 subtests that measure 5 cognitive  
40 domain indices: Attention, composed of Digit Span and Coding, Language, with Picture  
41 Naming and Semantic Fluency subtests, Visuospatial Construction including Figure Copy and  
42 Line Orientation subtests, Immediate Memory comprising List Learning and Story Memory  
43 subtests, and Delayed Memory composed of List Recall, List Recognition, Story Recall, and  
44 Figure Recall subtests. The sum of these 5 Index scores is converted to a Total Scale value via  
45 a mapping table. The Total Scale is a norm-based t-score based on a distribution with a mean  
46 of 100 and standard deviation of 15. The RBANS is administered face-to-face, has 3 alternate  
47 forms, is available in over 30 languages, and has been used in multinational clinical trials  
48 including AD trials. Alternating forms of the RBANS are also administered at the following  
49 timepoints: Months 3, 9, 15, 21, 27, 33, 39. During screening, participants' RBANS scores  
50 were used to delineate risk (low, medium, high) for developing MCI-AD, as described in the  
51 Main study [11].  
52  
53  
54  
55  
56  
57  
58  
59  
60

1  
2  
3 Secondary Cognitive outcomes and Functional outcomes are described in Table 2. More  
4 detailed description of these measures are provided in the CHARIOT PRO Main Study  
5 Protocol [11].  
6  
7

### 8 *Neuroimaging outcomes*

9  
10 Safety and volumetric scans (3DT1, FLAIR, T2\*, PD/T2, T1 and DWI): All potential CPSS  
11 participants underwent brain MRI at screening to assess eligibility, based on a central  
12 radiologist's interpretation of the MRI scan under the supervision of Bioclinica Inc. Borderline  
13 findings were reviewed by the Medical Monitor prior to determining participant eligibility.  
14 Image acquisition was performed at multiple sites based on a standardized MRI protocol.  
15 General Electric Signa HDxt 1.5T and Siemens TrioTim, Verio, Skyra and Prisma 3T scanners  
16 were used to acquire a volumetric 3D T1 weighted series in a sagittal plane, using 1.2 mm thick  
17 slices and a 192x192 acquisition matrix over a square FOV of 240 mm. Contrast parameters  
18 were field-strength and manufacturer dependent (Siemens MP-RAGE and GE IR-Prep Fast  
19 SPGR). The standardized MRI protocol also included 2D axial FLAIR, T2\* gradient echo,  
20 dual-echo proton-density and T2-weighted turbo/fast spin echo, T1-weighted turbo/fast spin  
21 echo and diffusion-weighted imaging. Proper implementation of the MRI protocol on each  
22 participating scanner was verified prior to first subject scan by use of American College of  
23 Radiology (ACR) phantom scans.  
24  
25  
26  
27  
28  
29  
30  
31  
32  
33  
34

35  
36 Exploratory scans (Task-free BOLD functional MRI (tf-fMRI) and high-resolution coronal  
37 T2sequences): At the ICL site, the first 800 subjects who were eligible for MRI underwent a  
38 dual-echo GRE field map and task-free functional MRI time series. For the remainder of the  
39 subjects, a high-resolution 2D coronal T2-weighted sequence was acquired, in order to  
40 visualize hippocampal subfields.  
41  
42  
43  
44

45 A $\beta$  PET: At final stage of screening, evidence of A $\beta$  pathology in potential CPSS participants  
46 was assessed by a brain PET scan. All images derived were evaluated centrally at Bioclinica  
47 Inc. for A $\beta$  status assessment. The assessments were performed by neuro-radiologists trained  
48 in the assessment of A $\beta$  PET scans using F18-radiolabeled amyloid tracers (Amyvid, Vizamyl  
49 and Neuraceq) for amyloid status according to the reading process developed by radiotracer  
50 vendors. The PET scan was evaluated at baseline to determine each patient's A $\beta$  status as  
51 positive or negative and therefore inclusion or exclusion into the trial. PET exams were  
52 acquired using a uniform scanning protocol that minimizes and accounts for between-site  
53 differences in PET systems, as characterized with a Hoffman phantom exam. All exams were  
54  
55  
56  
57  
58  
59  
60



1  
2  
3 acquired in 3D mode and employed correction for attenuation, scatter and random coincidence.  
4  
5 Semi-quantitative SUVR assessment was performed prior to the visual read. SUVR  
6  
7 calculations leveraged a FreeSurfer-based native-space MRI segmentation method. The A $\beta$   
8  
9 status assessment was a hybrid visual and quantitative approach (see Figure 3). A visual review  
10  
11 was performed by a single reader, followed by positivity assignment based on SUVR cutpoint.  
12  
13 In case of discrepancies between visual and SUVR results, a second reader was asked to  
14  
15 participate in a final decision on amyloid status, as part of a consensus review. The second  
16  
17 reader was given both the initial visual read and the SUVR measurement and convened with  
18  
19 the first reader to arrive at a consensus assessment.

### 20 *Fluid Biomarkers*

21  
22 Blood, saliva and urine samples for clinical assessments and future biomarker discovery  
23  
24 studies: At ICL and EDI, blood and urine samples were collected at screening to assess general  
25  
26 health status. These included: Haematology and Differential Panel, Lipid Panel, Chemistry  
27  
28 Panel, Electrolyte Panel, Coagulation Group, C-Reactive Protein, TSH, Folate, Vitamin B12  
29  
30 and Urine Macro Panel (with Urine Microscopy if abnormal Macro Panel).

31  
32 At ICL, serum, plasma, buffy coat, whole blood, urine and saliva samples are processed and  
33  
34 stored at baseline and annually thereafter for future biomarker exploration. Samples for  
35  
36 biobanking are collected between 9-11.30am and following an overnight fast; and are stored at  
37  
38 the ICL purpose-built -80°C biobank for future analyses. All samples are processed within two  
39  
40 hours of collection, as per guidelines on biomarker pre-processing [28]. Planned analyses  
41  
42 include untargeted metabolite and proteome profiling, to generate novel targets for future  
43  
44 hypothesis-testing and biomarker discovery studies.

45  
46 CSF biomarkers: For those participants not receiving A $\beta$  PET, CSF samples were collected  
47  
48 during screening and analyses for AD-related markers including beta-amyloid, total tau and  
49  
50 phosphorylated tau. The A $\beta$  data was used for determination of enrolment eligibility, and in  
51  
52 addition to the tau data, will be useful for disease modelling and staging of pre-clinical AD per  
53  
54 NIA-AA criteria [2]. At ICL, additional aliquots of CSF samples are stored in the -80°C  
55  
56 biobank for future analyses, which may include the exploration of putative biomarkers of AD  
57  
58 pathophysiology as they arise in the literature.

59  
60 Genetic outcomes: Whole blood is collected in EDTA tubes for extraction of genomic DNA  
(gDNA) using standard methods. gDNA were thus isolated via commercially available kit  
following manufacturer instructions (QIAGEN QIASymphony DSP DNA Mini Kits or Promega

1  
2  
3 Maxwell RSC Whole Blood DNA Kit). Both kits facilitate automated magnetic bead-based  
4 extractions that successfully extract DNA from Human Whole Blood samples with good  
5 quantitation and purity assessments. The QPS validated pyrosequencing genotyping assays for  
6  
7 *APOE* codon 112T>C and codon 158C>T polymorphic variants were used to genotype  
8  
9 participant's gDNA samples and identify *APOE* ε4 Carriers and *APOE* ε4 Non-Carriers status.  
10  
11 By interrogating these two polymorphic variants, we identified the three *APOE* alleles: *APOE*  
12 ε2(TGC 112, TGC 158), *APOE* ε3 (TGC 112, CGC 158), and *APOE* ε4 (CGC 112, CGC 158).  
13  
14 *APOE* genotype status has been determined for the enrolled cohort. A genome-wide-analysis  
15  
16 study is under-way and data expected to be available during the study. At ICL, whole blood is  
17  
18 also collected in a PAXgene® Blood RNA tube containing reagent for stabilization of  
19  
20 intracellular RNA, and stored -80°C. These samples will be used for future genetic analyses.  
21  
22

### 23 ***Medical History and Clinical examinations (Physical and neurological examination)***

24  
25 A thorough medical history was obtained including an evaluation of all body systems (ENT,  
26  
27 ophthalmic, musculoskeletal, gastrointestinal, urinary, respiratory, renal, cardiovascular,  
28  
29 dermatological) with an emphasis on relevant medical history (e.g. neurological, psychiatric,  
30  
31 substance abuse, endocrine and metabolic). Safety and compatibility for neuroimaging were  
32  
33 further ensured prior to the procedure.

34  
35 Clinical examination included General Physical examination and a separate comprehensive  
36  
37 Neurological Physical examination. The General Physical examination assessment included:  
38  
39 General appearance, Dermatologic (including Mucous Membranes), Ear, nose, throat (ENT),  
40  
41 Cardiovascular, Respiratory, Abdomen, Lymph Nodes, Musculoskeletal and any other  
42  
43 findings. At Neurological Examination, Mental status, Cranial nerves, Motor (strength), Tone,  
44  
45 Involuntary movements, Coordination (Finger-nose, Gait, Postural reflexes and Heel to shin),  
46  
47 Sensation (Proprioception, Cold, Light touch), Deep tendon reflexes, Plantar reflexes and  
48  
49 presence of other neurological signs (e.g. tremor) were assessed.

### 50 ***Safety reporting***

51  
52 During the whole course of the study, new medical conditions and changes in medication were  
53  
54 assessed at every site visit. All adverse events (serious and non-serious) were documented and  
55  
56 reported according to the same protocol procedures applied in the main CHARIOT:PRO Main  
57  
58 Study [11]. Briefly, serious and non-serious events that occur from inception of participation  
59  
60 all through to completion of last study-related procedure are captured and recorded for all  
participants. Events are judged as serious if fatal, immediately life-threatening; require

1  
2  
3 hospitalization or prolonging of existing hospitalization; permanently (or significantly)  
4 disabling; a congenital anomaly or birth defect (in an offspring); or medically significant.  
5 Further data recorded for each suspected adverse event included the description (signs and  
6 symptoms or diagnosis), seriousness criteria, severity rating, duration (onset and resolution  
7 date), actions taken and outcome.  
8  
9  
10  
11  
12  
13  
14

### 15 **Study participant and public involvement**

16  
17 The ICL (via CHARIOT register) and EDI team have established Research volunteer panels  
18 consisting of lay members who met on an ad-hoc basis to support study development during  
19 the planning stage. These panels provided feedback on study design, procedures and  
20 dissemination for lay audiences. A newsletter is provided to study participants with updates  
21 regarding recruitment, study milestones and any important changes to the Protocol. Participants  
22 were not directly involved in recruitment activities for the study.  
23  
24  
25  
26  
27

28 CPSS participants further provide feedback on the experience of research participation at the  
29 different study visits, to ensure that their perspectives are represented in decision-making about  
30 the future of the project and to advise on planned study activities, including dissemination  
31 plans. Annual participant seminars are conducted for dissemination of study results and  
32 discussion of future plans. A newsletter is provided to study participants quarterly for study  
33 updates, as well as future plans. Participant input and feedback on volunteer experiences is  
34 typically encouraged for inclusion in the newsletter.  
35  
36  
37  
38  
39  
40

### 41 **Ethical and regulatory considerations**

42  
43 To ensure the quality and integrity of research, CPSS is conducted in accordance with GCP  
44 Guidelines, GPPs issued by ISPE, applicable national guidelines, and to the Declaration of  
45 Helsinki 2013, as modified by the 52nd World Medical Assembly (WMA), Edinburgh,  
46 Scotland, 2000, and clarified by the WMA General Assembly, Washington 2002 and Tokyo  
47 2004. The study has received approval from the National Research Ethics Service (NRES)  
48 Committee London Central (reference 15/LO/0711 [IRAS 140764]), as well as independent  
49 ethics review by committees from the local sites.  
50  
51  
52  
53  
54  
55

56 Informed consent: Formal informed consent is taken using an informed consent form (ICF)  
57 from both participant and study partners before participation in the study. Given the possibility  
58 that participants might lose mental capacity during the study; it was recommended at the outset  
59  
60

1  
2  
3 of participation that the participant identified a Legally Authorized Representative (LAR). A  
4 LAR may include the spouse, a person specifically appointed to take care of the legal interests  
5 of the participant, an individual with guardianship, and a health care proxy, who provides  
6 consenting for research studies which is within the legal scope of the proxy's delegated  
7 responsibilities (according to local applicable laws). The LAR must have the cognitive and  
8 mental capacities (as determined by the site Investigator) enabling him/her to understand the  
9 procedures, risks, and benefits involved with the study. The consent was given, and the form  
10 signed, at the initial visit or at follow-up visits at the study sites, based on the choice of the  
11 participant, and, where necessitated, on the choice of the LAR.  
12  
13  
14  
15  
16  
17  
18

19 Duty of care: As part of the duty of care during the study, all clinically relevant information is  
20 shared with study participants where relevant and, with participant's consent, communicated  
21 to the GP for medical follow-up. The clinically relevant findings shared included systemic  
22 hypertension and significant changes in cognitive assessments where the investigator felt they  
23 were relevant.  
24  
25  
26  
27  
28

29 Confidentiality: Participant confidentiality is strictly maintained. Each participant is assigned  
30 a unique participant identifier upon study enrolment, which is used for all subsequent data  
31 analysis and reporting. Participants' National Health Service (NHS) numbers are collected and  
32 stored in keeping with industry standards for encryption/data protection, allowing for  
33 subsequent data collection from electronic health records in primary or secondary care within  
34 NHS. This data collection only occurs following NRES approval. All parties ensure that  
35 participant personal data is not included on any study forms, reports, publications, or in any  
36 other disclosures, except where required by law. The Investigators in compliance with Federal  
37 regulations, other applicable laws and International Conference on Harmonization (ICH) GCP  
38 Guidelines keep documents that are not for submission to the Sponsor and/or its designee (e.g,  
39 signed ICFs and Participant Information Sheets) in strict confidence. In accordance with  
40 regulations in the UK, participants are informed about data handling procedures.  
41  
42  
43  
44  
45  
46  
47  
48  
49

### 50 **Data management, analysis, and dissemination plans**

51  
52 **Data Management:** The CPSS is conducted in accordance with Good Clinical Practice (GCP)  
53 Guidelines as such data is recorded and stored in a way that could be verified and reported in  
54 an accurate manner. All essential documents are filed in the Trial Master File/Investigator Site  
55 File. Source documents are kept in both paper and electronic formats. The main Electronic  
56 Data Capture system used in the current study is Medidata Rave. Both paper and electronic  
57  
58  
59  
60

1  
2  
3 data are subject to daily and monthly internal audits based on Standard Operating Procedures  
4 (SOPs). In addition, the Investigator Site Files, paper source documentation and electronic  
5 source data are routinely monitored to maintain data accuracy collection to the highest degree.  
6  
7

8  
9 **Statistical Analysis:** Assuming the 3.5-year change from baseline in the G-PACC score has a  
10 standard deviation of 2.4 for the A $\beta$  positive participants [29], a sample size of n = 250 with a  
11 3.5-year dropout rate of 31% (i.e., 10%/year) ensures the 95% confidence interval (CI) for the  
12 3.5-year mean change in G-PACC score in A $\beta$  positive participants to be no wider than 0.72,  
13 assuming that the sample mean follows a Gaussian distribution. Analysis of change in G-PACC  
14 and RBANS over time will be performed with mixed models for repeated measures (MMRM)  
15 which assumes that missing data due to dropout are missing-at-random (MAR). The robustness  
16 of the analysis with respect to deviations from the MAR assumption will be evaluated.  
17 Analyses of the accruing results may be performed periodically while the study is ongoing.  
18 Analyses will generally be descriptive, but inferential analyses might be performed as needed.  
19 Potential unblinded interim analyses include:  
20  
21  
22  
23  
24  
25  
26  
27

28 (i) Analyses for baseline characterization of participants.

29 (ii) Analyses for determining longitudinal change in study endpoints once the last ongoing  
30 subject completes the Month 12, Month 24, and Month 36 visits. These analyses will include  
31 descriptive statistics (n, mean, standard deviation) and/or proportions for the A $\beta$  positive and  
32 negative groups, but the A $\beta$  status of individual participants will remain blinded.  
33  
34  
35  
36  
37  
38

## 39 DISCUSSION

40  
41  
42 With the pre-clinical disease stages being increasingly recognized as the best timing for  
43 intervention, it is paramount that trial evaluations are sensitive enough to detect and track  
44 cognitive, functional and biological changes emerging in these stages while also  
45 possessing sufficient efficacy to detect therapeutic effects for drug trials. Furthermore, there is  
46 an urgency to identify robust and sensitive predictors of clinical progression in order to estimate  
47 individual risks for clinical AD and develop and apply therapeutic strategies prior to emergence  
48 of clinically evident AD dementia. Although an ambitious project, some limitations of this  
49 work are worth mentioning. The amyloid positivity rate is low and due to a need for an equal  
50 number of participants in each group (amyloid positive; amyloid negative), a high number of  
51 participants (78.6%) were excluded from the longitudinal follow-up phase. As a mitigating  
52 measure, enrichment criteria were introduced, with requirement of first-degree family history  
53  
54  
55  
56  
57  
58  
59  
60

1  
2  
3 in volunteers aged 60-65 years old. The conduct of the study at only two sites is not typical of  
4 multi-site international trials; on the other hand, this minimizes several sources of variability  
5 that are independent of aging and incipient Alzheimer's disease (e.g., inter-rater variability and  
6 differences in psychometric equivalence among different translations). It could be argued that  
7 the cognitive battery set may not be sensitive in predicting AD in healthy older adults, since  
8 these mostly tax modalities associated with AD dementia diagnostic criteria. Nonetheless, the  
9 high frequency (quarterly) follow-up of participants will facilitate determination of those  
10 assessments most sensitive for identifying the earliest signs and symptoms of AD-dementia  
11 and offers an opportunity to assess other performance parameters (e.g. qualitative errors, lack  
12 of practice effect; speed-accuracy trade-offs) that may indicate changes in cognitive and/or  
13 cerebral integrity in the lead up to AD dementia [30]. Similarly, other assessments of physical  
14 health pertinent to AD risk, such as gait, hearing, or dental health are not included in our study.  
15 However, we do collect extensive medical history information at baseline and follow-ups that  
16 includes clinical abnormalities (e.g. mobility issues; hearing impairment) that may be useful in  
17 our analyses.  
18  
19  
20  
21  
22  
23  
24  
25  
26  
27  
28  
29

30  
31 The CPSS contributes towards this global agenda of AD-dementia prevention. The study  
32 features detailed and frequent clinical and cognitive assessments in a deeply phenotyped,  
33 presymptomatic cohort of older adults. An overall aim of the study is to prospectively compare  
34 changes in cognition, and other clinical measures, between individuals with presence of  
35 pathological levels of brain A $\beta$  detected in PET scans or CSF and those without such evidence.  
36 CPSS also introduces a novel cognitive composite, the G-PACC, as a possible endpoint for  
37 future clinical trials. In this way, CPSS will expand upon prior retrospective investigations of  
38 proposed cognitive composites [29], by prospectively investigating the longitudinal change of  
39 the components of the G-PACC composite. The performance of the G-PACC to detect effects  
40 will be compared against another cognitive composite and its subtests, the RBANS. The  
41 addition of the RBANS subtests, alongside other clinical data, will allow for the exploration of  
42 novel cognitive risk profiles for the progression of future AD. The baseline data will determine  
43 which measures are most sensitive for predicting longitudinal AD-related cognitive decline,  
44 informing future screening methods for clinical trials. The study includes both patient and  
45 proxy-versions of functional interviews, such as the CFI and ADCS-ADL, to investigate  
46 longitudinal changes in everyday functioning in preclinical-AD individuals alongside cognitive  
47 decline and clinical characteristics. Dietary patterns and other lifestyle variables will also be  
48 assessed to consider the impact of environmental exposures on AD development. Therefore,  
49  
50  
51  
52  
53  
54  
55  
56  
57  
58  
59  
60

1  
2  
3 the CPSS will also allow for the exploration of environmental and lifestyle predictors of  
4 cognitive decline and impairment.  
5  
6  
7

8 The uniqueness of this study lies in its breadth and frequency (every 3 months) of assessments,  
9 as well as the planned explorations and comparisons of proposed cognitive composites for AD  
10 detection and tracking. The prolonged and detailed follow-up data offers opportunities for  
11 precise disease modelling and the evaluation of several methodological controversies within  
12 clinical trial design, such as the influence of practice effects on cognitive performance, in  
13 addition to mechanisms of reserve and resilience against cognitive senescence.  
14  
15  
16  
17  
18

19 To date, CPSS has successfully completed its enrolment of 519 participants across two UK  
20 research sites, from 2,451 screened volunteers. Next steps in CPSS's milestones include the  
21 exploration of the baseline data for initial comparative analyses between stratified participant  
22 groups. The CPSS will continue as a multinational and multidisciplinary collaboration between  
23 industry, academia and the NHS to promote greater understanding of the etiology of AD  
24 pathological attributes and symptom development, and champion the search for effective  
25 preventative therapies. Future plans include study extension to at least 4.5 years, at the ICL  
26 site, with addition of Tau-PET and follow-up structural MRI, and extensive state-of-art fluid  
27 biomarker discovery explorations at multiple timepoints.  
28  
29  
30  
31  
32  
33  
34  
35  
36  
37

### 38 **Acknowledgments**

39  
40 The authors wish to thank the participants who continue to volunteer their time and  
41 commitment towards the CPSS. We thank the staff at various sites who assist in the collection  
42 of biological, cognitive and other clinical data, and we thank the Sponsor for funding this work.  
43 Imperial College London is grateful for support from the NIHR NW London Applied Research  
44 Collaboration.  
45  
46  
47  
48  
49  
50

### 51 **References**

- 52 1. Alzheimer's Disease, I., World Alzheimer's Report 2019 Attitudes to Dementia.
- 53 2. Jack, C.R., Jr., et al., NIA-AA Research Framework: Toward a biological definition of  
54 Alzheimer's disease. *Alzheimers Dement*, 2018. 14(4): p. 535-562.  
55  
56  
57  
58  
59  
60

- 1  
2  
3 3. Papp, V.K., et al., Clinical meaningfulness of subtle cognitive decline on longitudinal testing  
4 in preclinical AD. *Alzheimers Dement*, 2020. 16(3): p. 552-560  
5
- 6  
7 4. Sperling, R.A., et al., Toward defining the preclinical stages of Alzheimer's disease:  
8 Recommendations from the National Institute on Aging-Alzheimer's Association workgroups  
9 on diagnostic guidelines for Alzheimer's disease. *Alzheimer Dement* 2011. 7(3): p. 280–292  
10
- 11 5. Dubois, B., et al., Preclinical Alzheimer's disease: Definition, natural history, and diagnostic  
12 criteria. *Alzheimers Dement*, 2016. 12(3): p. 292-323.  
13
- 14 6. Jansen, W.J., et al., Prevalence of cerebral amyloid pathology in persons without dementia:  
15 a meta-analysis. 2015. 313(19): p. 1924-38  
16
- 17 7. Jack, C.R., Jr., et al., Age-specific and sex-specific prevalence of cerebral beta-amyloidosis,  
18 tauopathy, and neurodegeneration in cognitively unimpaired individuals aged 50-95 years: a  
19 cross-sectional study. *Lancet Neurol*, 2017. 16(6): p. 435-444  
20
- 21 8. Morris, J.C., et al., Pittsburgh compound B imaging and prediction of progression from  
22 cognitive normality to symptomatic Alzheimer disease. *Arch Neurol*, 2009. 66(12): p. 1469-  
23 75.  
24
- 25 9. Doraiswamy, P.M., et al., Amyloid-beta assessed by florbetapir F 18 PET and 18-month  
26 cognitive decline: a multicenter study. *Neurology*, 2012. 79(16): p. 1636-44.  
27
- 28 10. Kawas, C.H., et al., Amyloid imaging and cognitive decline in nondemented oldest-old: the  
29 90+ Study. *Alzheimers Dement*, 2013. 9(2): p. 199-203.  
30
- 31 11. Udeh-Momoh, C., et al., Prospective Evaluation of Cognitive Health and Related Factors  
32 in Elderly at Risk for Developing Alzheimer's Dementia: A Longitudinal Cohort Study. *J Prev*  
33 *Alzheimers Dis*, 2019. 6(4): p. 256-266  
34
- 35 12. Randolph, C., et al., The Repeatable Battery for the Assessment of Neuropsychological  
36 Status (RBANS): preliminary clinical validity. *J Clin Exp Neuropsychol*, 1998. 20(3): p. 310-  
37 9.  
38
- 39 13. Beffert, U., et al., Apolipoprotein E and  $\beta$ -amyloid levels in the hippocampus and frontal  
40 cortex of Alzheimer's disease subjects are disease-related and apolipoprotein E genotype  
41 dependent. *Brain Res*, 1999. 843(1-2): p. 87-94.  
42  
43  
44  
45  
46  
47  
48  
49  
50  
51  
52  
53  
54  
55  
56  
57  
58  
59  
60



- 1  
2  
3 14. Nalbantoglu, J., et al., Predictive value of apolipoprotein E genotyping in Alzheimer's  
4 disease: Results of an autopsy series and an analysis of several combined studies. *Ann Neurol*,  
5 1994. 36(6): p. 889-95.  
6  
7
- 8  
9 15. Yamazaki, Y., et al., Apolipoprotein E and Alzheimer disease: pathobiology and targeting  
10 strategies. *Nat Rev Neurol*, 2019. 15(9): p. 501-518.  
11  
12
- 13 16. Wanis, H., The CHARIOT Register: a primary care-based recruitment register for research  
14 into dementia and healthy ageing. *British Journal of General Practice*, 2019. 69(suppl 1).  
15  
16
- 17 17. Larsen, M., et al., Development of the CHARIOT Research Register for the Prevention of  
18 Alzheimer's Dementia and Other Late Onset Neurodegenerative Diseases. *PLoS One*, 2015.  
19 10(11): p. e0141806.  
20  
21
- 22 18. Roberts, R.O., et al., Prevalence and Outcomes of Amyloid Positivity Among Persons  
23 Without Dementia in a Longitudinal, Population-Based Setting. *JAMA Neurol*, 2018. 75(8): p.  
24 970-979.  
25  
26
- 27 19. Randolph C. Repeatable Battery for the Assessment of Neuropsychological Status  
28 (RBANS). San Antonio, TX: Psychological Corporation; 1998.  
29  
30
- 31 20. Hammers, D., et al., Reliability of repeated cognitive assessment of dementia using a brief  
32 computerized battery. *Am J Alzheimers Dis Other Demen*, 2011. 26(4): p. 326-33.  
33  
34
- 35 21. Delis, D.C., et al., Reliability and validity of the Delis-Kaplan Executive Function System:  
36 an update. *J Int Neuropsychol Soc*, 2004. 10(2): p. 301-3.  
37  
38
- 39 22. de Roquefeuil Guilhem, R.K., COGNITO: Computerized Assessment of Information  
40 Processing. *Journal of Psychology & Psychotherapy*, 2014. 04(02).  
41  
42
- 43 23. Udeh-Momoh, C. et. al., Transition from physical to virtual visit format for a longitudinal  
44 brain aging study, in response to the Covid-19 pandemic. Operationalizing adaptive methods  
45 and challenges. *Alzheimers & Dementia*, 2020. 6(1): e12055. (doi: 10.1002/trc2.12055)  
46  
47
- 48 24. Weintraub, S., et al., Measuring cognition and function in the preclinical stage of  
49 Alzheimer's disease. *Alzheimer's & Dementia: Translational Research & Clinical  
50 Interventions*, 2018. 4(1): p. 64-75.  
51  
52
- 53 25. Grober, E., K. Ocepek-Welikson, and J.A. Teresi, The Free and Cued Selective Reminding  
54 Test: evidence of psychometric adequacy. *Psychology Science Quarterly*, 2009. 51(3), p. 266-  
55 282.  
56  
57  
58  
59  
60

1  
2  
3 26. Drozdick, L. W., Raiford, S. E., Wahlstrom, D., & Weiss, L. G. The Wechsler Adult  
4 Intelligence Scale—Fourth Edition and the Wechsler Memory Scale—Fourth Edition. In D. P.  
5 Flanagan & E. M. McDonough (Eds.), *Contemporary intellectual assessment: Theories, tests,*  
6 *and issues* (p. 486–511). The Guilford Press; 2018  
7  
8  
9

10  
11  
12  
13 27 Folstein, M.F., S.E. Folstein, and P.R. McHugh, "Mini-mental state". A practical method  
14 for grading the cognitive state of patients for the clinician. *Journal of Psychiatric Research,*  
15 1975. 12(3): p. 189-198.  
16  
17

18  
19 28. O'Bryant, S.E., et al., Guidelines for the standardization of preanalytic variables for blood-  
20 based biomarker studies in Alzheimer's disease research. *Alzheimers Dement,* 2015. 11(5): p.  
21 549-60.  
22  
23

24  
25 29. Donohue, M.C., et al., The preclinical Alzheimer cognitive composite: measuring amyloid-  
26 related decline. *JAMA Neurol,* 2014. 71(8): p. 961-70.  
27  
28

29 30. Thomas, K.R., et al., Using Neuropsychological Process Scores to Identify Subtle  
30 Cognitive Decline and Predict Progression to Mild Cognitive Impairment. *J Alzheimers Dis,*  
31 2018. 64(1): p. 195-204.  
32  
33

34 31. Nelson, H.E. and J. Willison, *The National Adult Reading Test (NART)*. Windsor: Nfer-  
35 Nelson; 1991.  
36  
37

38 32. Lynch, W.J., *A New Neuropsychological Test Battery: The NAB*. *The Journal of Head*  
39 *Trauma Rehabilitation,* 2004. 19(2): p. 180-183.  
40  
41

42 33. Bott, N., et al., Device-Embedded Cameras for Eye Tracking–Based Cognitive Assessment:  
43 Validation With Paper-Pencil and Computerized Cognitive Composites. *J Med Internet Res,*  
44 2018. 20(7): p. e11143.  
45  
46  
47

48 34. Simpson, P.M., et al., The cognitive drug research computerized assessment system for  
49 demented patients: A validation study. *International Journal of Geriatric Psychiatry,* 1991. 6(2):  
50 p. 95-102.35. Hughes, C.P., et al., A new clinical scale for the staging of dementia. *British*  
51 *Journal of Psychiatry,*1982. 140(6): p. 566-572.  
52  
53  
54

55  
56 36. Walsh, S.P., et al., ADCS Prevention Instrument Project: the Mail-In Cognitive Function  
57 Screening Instrument (MCFSI). *Alzheimer Dis Assoc Disord,* 2006. 20(4 Suppl 3): p. S170-8.  
58  
59  
60

1  
2  
3 37. Galasko, D., et al., ADCS Prevention Instrument Project: assessment of instrumental  
4 activities of daily living for community-dwelling elderly individuals in dementia prevention  
5 clinical trials. *Alzheimer Dis Assoc Disord*, 2006. 20(4 Suppl 3): p. S152-69.  
6  
7  
8  
9

### 10 **Author Statement:**

11  
12  
13 Prof Middleton served as the ICL study site principal investigator. Prof Ritchie served as the  
14 EDI study site principal investigator. Dr. Udeh-Momoh served as the lead author, with Dr  
15 Watermeyer as co-lead. Drs. Udeh-Momoh, Kivipelto, Car, Pernecky, Price, de-Jager Loots  
16 and Ward were co-investigators at School of Public Health, Imperial College London. Dr  
17 Ritchie was co-investigator at Centre for Dementia Prevention, University of Edinburgh. All  
18 principal and co-investigators contributed to the study design, coordination, data acquisition,  
19 development and critical review of the manuscript. Dr. Scott and Mr Bracoud were employees  
20 at Bioclinica Inc., and developed the imaging protocol for the study, and participated in  
21 development and critical review of the manuscript. Prof Majeed co-developed the Chariot  
22 Register at School of Public Health, Imperial College London. Drs. Bassil, Robb, Cohn,  
23 Giannakopoulou, Kafetsouli, Chowdary and Ms Perera, Mclellan-Young, Lakey, Crispin and  
24 Curry were study investigators at School of Public Health, Imperial College London; Drs.  
25 Tamlyn Watermeyer and Natalia Reglinska-Matveyev were study investigators at Centre for  
26 Dementia Prevention, University of Edinburgh, and all contributed to data acquisition and  
27 review of the manuscript. Drs. Novak, Ropacki, Arrighi, Ketter, Raghavan, Saad and Brashear  
28 and Mr Fogle contributed to the study conception, protocol design, and development. Drs.  
29 Novak, Baker, Kacher, Saad and Mr Fogle contributed to study design and were responsible  
30 for data review, interpretation, and development of the manuscript. In addition, Dr. Arrighi was  
31 project pharmacoepidemiologist and Drs. Raghavan, Di and Kacher served as project  
32 biostatisticians, responsible for aspects of study design, statistical data analysis and statistical  
33 input. Dr Saad served as the unblinded statistician and imaging lead for the project.  
34  
35  
36  
37  
38  
39  
40  
41  
42  
43  
44  
45  
46  
47  
48  
49

50 All authors met ICMJE criteria and all those who fulfilled those criteria are listed as authors.  
51 All authors provided direction and comments on the manuscript, made the final decision about  
52 where to publish this protocol and approved the final draft and submission to this journal.  
53  
54  
55  
56  
57  
58  
59  
60

**Table 1: CHARIOT PRO study exclusionary findings post screening MRI**

- edema including amyloid-related imaging abnormalities (ARIA-E)
- hydrocephalus
- >25% age related white matter disease,
- frontal or temporal atrophy not typical of AD)
- history or evidence of a single prior hemorrhage >1 cm<sup>3</sup>
- multiple lacunar infarcts (2 or more) or
- single prior infarct >1 cm<sup>3</sup>
- cerebral contusion, encephalomalacia
- aneurysms, vascular malformations
- subdural hematoma
- space occupying lesions (eg, abscess or brain tumors such as meningioma >1cm)
- MRI features atypical of AD dementia.

\*Evidence of brain edema (eg, ARIA-E, vasogenic edema, hemosiderin deposits [HD] ≥10 mm in size or HD <10 mm in size but >10 in number) will be reviewed by the Sponsor's Medical Monitor to address plans for clinical evaluation and follow up as well as for potential inclusion/exclusion in the study.

**Table 2 CHARIOT PRO study Cognitive and Functional outcomes**

| Cognitive Outcome                                                                    | Description                                                                                                                                                                                                                                                                                                                                                                                                                                                                                                | Assessment Schedule |
|--------------------------------------------------------------------------------------|------------------------------------------------------------------------------------------------------------------------------------------------------------------------------------------------------------------------------------------------------------------------------------------------------------------------------------------------------------------------------------------------------------------------------------------------------------------------------------------------------------|---------------------|
| <i>Secondary outcomes</i>                                                            |                                                                                                                                                                                                                                                                                                                                                                                                                                                                                                            |                     |
| National Adult Reading Test (NART) [31]                                              | The NART is a word reading and pronunciation task comprising 50 English words with irregular grapheme-phoneme and stress rules. It is used to provide an estimate of premorbid intellectual functioning. Average administration time: 10 minutes.                                                                                                                                                                                                                                                          | BL                  |
| Neuropsychological Assessment Battery (NAB) Executive Function module (PAR Inc) [32] | The executive function module comprises subtasks that examine planning, impulse control and psychomotor speed (through pen and paper mazes trials of increasing difficulty); judgement and decisional capacity (through questions pertaining to home safety, health and medical issues); concept formation, cognitive flexibility and response set (through a classification and categorization task) and fluency and generativity (through a word fluency task). Average administration time: 30 minutes. | M12, M24, M36       |

|                                                                                                |                                                                                                                                                                                                                                                                                                                                                                                                                                                                                                                                                                                                                                                                                                                                                                      |                                 |
|------------------------------------------------------------------------------------------------|----------------------------------------------------------------------------------------------------------------------------------------------------------------------------------------------------------------------------------------------------------------------------------------------------------------------------------------------------------------------------------------------------------------------------------------------------------------------------------------------------------------------------------------------------------------------------------------------------------------------------------------------------------------------------------------------------------------------------------------------------------------------|---------------------------------|
| Neuropsychological Assessment Battery (NAB) - Memory module (PAR, Inc)                         | The memory module comprises explicit learning, free recall, delayed recall and/or delayed recognition subtasks across verbal (list learning; story learning; medication instructions and name and address) and visual (shape learning) information. Average administration time: 45 minutes.                                                                                                                                                                                                                                                                                                                                                                                                                                                                         | M12, M24, M36                   |
| NEUROTRACK ( <i>Neurotrack Technologies, Inc</i> ) [33]                                        | Neurotrack is a declarative memory test based on digital eye tracking, administered on an IPAD. The task is a recognition memory test, relying on an individual's innate preference for novelty. In a familiarization phase, participants are presented with 2 identical images, side by side on the computer screen. This is followed by a test phase, in which a familiar image presented during the familiarization phase and a novel image are shown together. The ratio of time an individual gazes at the novel stimulus relative to the total viewing time constitutes a novelty preference score, with higher scores indicating superior declarative memory function and lower scores indicating impaired function. Average administration time: 10 minutes. | M3, M9, M15, M21, M27, M33, M39 |
| <i>Randomised tasks</i>                                                                        |                                                                                                                                                                                                                                                                                                                                                                                                                                                                                                                                                                                                                                                                                                                                                                      |                                 |
| Cognitive Drug Research Assessment System (CDRAS) (Bracket; United BioSource Corporation) [34] | The CDRAS measures three domains of cognition: Attention (simple and choice reaction time, digit vigilance); Working memory (articulatory and spatial working memory); Episodic secondary memory (word recall, word recognition and picture recognition). Average administration time: 20 minutes.                                                                                                                                                                                                                                                                                                                                                                                                                                                                   | M3, M9, M15, M21, M27, M33, M39 |
| Cogstate (Cogstate, Inc) [20]                                                                  | CogState consists of 4 tasks involving the presentation of playing cards. These tasks measure the functions of attention, processing speed, visual learning, and working memory using standard psychometric paradigms (ie, simple and choice reaction time, n-back and pattern separation learning). For the first assessment visit, M3, the task is administered twice within one session to control for task familiarity and practice effects. Average administration time: 15 minutes.                                                                                                                                                                                                                                                                            | M3, M9, M15, M21, M27, M33, M39 |

|                                                                                   |                                                                                                                                                                                                                                                                                                                                                                                                                                                                                                                                                                                                                                                                                                                                                                                                                                                                                                                                                                                            |                                        |
|-----------------------------------------------------------------------------------|--------------------------------------------------------------------------------------------------------------------------------------------------------------------------------------------------------------------------------------------------------------------------------------------------------------------------------------------------------------------------------------------------------------------------------------------------------------------------------------------------------------------------------------------------------------------------------------------------------------------------------------------------------------------------------------------------------------------------------------------------------------------------------------------------------------------------------------------------------------------------------------------------------------------------------------------------------------------------------------------|----------------------------------------|
| <p>Delis-Kaplan Executive Function System (Pearson) [21]</p> <p>ICL Site Only</p> | <p>The DKEFS is a paper and pencil measure of verbal and nonverbal executive functions and comprises 9 subtests. For this study, the Trail Making Test (visual attention and task switching) and Verbal Fluency (fluency and generativity) subtests are used. Total average administration time to complete these 2 subtests: 15 minutes.</p>                                                                                                                                                                                                                                                                                                                                                                                                                                                                                                                                                                                                                                              | <p>M3, M9, M15, M21, M27, M33, M39</p> |
| <p>Cognito [22]</p> <p>EDI Site Only</p>                                          | <p>COGNITO is a computerized task which assesses reaction time, primary and working memory (an articulation subtest further permitting identification of problems related to the articulatory loop), visuospatial and verbal secondary memory (with free, cued and multiple choice paradigms), implicit learning (priming), language skills (word and syntax comprehension, naming, verbal fluency), functional and semantic categorization of visual data (visual reasoning and form perception), focused and divided attention (visual and auditory modalities), and crystallized intelligence (vocabulary). Responses are made via a tactile screen which permits the recording of response latency (deducting reaction time provides an estimation of information processing time). Qualitative aspects of performance (perseveration, intrusions, visual field neglect) are also recorded. Administration time varies between 45- to 60-minute, depending on level of impairment.</p> | <p>M3, M9, M15, M21, M27, M33, M39</p> |
| <p><b>Functional Outcomes</b></p>                                                 | <p><b>Description</b></p>                                                                                                                                                                                                                                                                                                                                                                                                                                                                                                                                                                                                                                                                                                                                                                                                                                                                                                                                                                  | <p><b>Assessment Schedule</b></p>      |
| <p>Clinical Dementia Rating Scale [35]</p>                                        | <p>The CDR is used as a clinical staging instrument and is administered to both participant and study partner, using a semi-structured format. It assesses six domains: memory; orientation; judgment and problem solving; involvement in community affairs; home and hobbies; and personal care. Average administration time: 15-20 minutes with the study partner and 10-15 minutes with the participant, depending on the severity of cognitive impairment.</p>                                                                                                                                                                                                                                                                                                                                                                                                                                                                                                                         | <p>M12, M24, M36</p>                   |

|                                                                                           |                                                                                                                                                                                                                                                                                                                                                                                                                                                                                                                                                                                                                                                    |                      |
|-------------------------------------------------------------------------------------------|----------------------------------------------------------------------------------------------------------------------------------------------------------------------------------------------------------------------------------------------------------------------------------------------------------------------------------------------------------------------------------------------------------------------------------------------------------------------------------------------------------------------------------------------------------------------------------------------------------------------------------------------------|----------------------|
| <p>Cognitive Function Index [36]</p>                                                      | <p>The CFI is a modified version of the Mail-in Cognitive Function Screening Instrument (MCFSI, Walsh et al, 2006) a self- and informant-reported subjective outcome measure regarding activities of daily living. It includes 14 questions that assess participants' perceived ability to perform high level tasks in daily-life and their sense of overall cognitive functional ability, indicating whether or not there has been a change in performance (yes/no/maybe) compared to 1 year ago. Study participants and their study partners independently rate the participant's level of ability. Average administration time: 10 minutes.</p> | <p>M12, M24, M36</p> |
| <p>Alzheimer's disease Cooperative Study ADL prevention instrument (ADCS-ADL-PI) [37]</p> | <p>The ADCS-ADL-PI includes 15 subjectively rated questions related to activities of daily living and 5 questions related to physical functioning. <b>Error! Reference source not found.</b> Study participants and their study partners independently rate the study participant's level of ability. Partners are additionally asked to evaluate whether activities were completed less often, required more time to complete, and if errors were made performing the task. Physical functioning items are rated as yes or no. Average administration time: 10 minutes.</p>                                                                       | <p>M12, M24, M36</p> |

Note: BL – Baseline

### Figure 1 The CHARIOT:PRO Substudy Recruitment Pathway

a. Join Dementia Research; b. Scottish Primary Care Research Network; c. formerly Centre for Dementia Prevention; d. CHARIOT:PRO Main Study, e. formerly Neuroepidemiology and Ageing (NEA) Research Unit

### Figure 2 Screening and baseline assessment schedule

CDR=Clinical Dementia Rating; CSF=cerebrospinal fluid; MRI=magnetic resonance imaging; PACC=Preclinical Alzheimer Cognitive Composite; PET=positron emission tomography; RBANS=Repeatable Battery for the Assessment of Neuropsychological Status; CFI=Cognitive Function Index; ADCS-ADL-PI=ADCS-Activities of Daily Living - Prevention Instrument; NAB=Neuropsychological Assessment Battery; NART-National Adult Reading Test; GDS=Geriatric Depression Scale; STAI –State Trait Anxiety Inventory

### Figure 3: PET A $\beta$ Status Reading Workflow

SUVR = Standardized Uptake Value Ratio; Q = quantification of SUVR; FS = parcellation of cerebral structures based on Freesurfer imaging pipeline; QC = quality control assessment; VIS = result of visual assessment of amyloid PET; A $\beta$ + = assessed as A $\beta$  positive based on visual and/or quantitative (SUVR) analysis of amyloid PET





**Figure 1. The CHARIOT:PRO Recruitment Pathway**



Figure 2 Screening and baseline assessment schedule

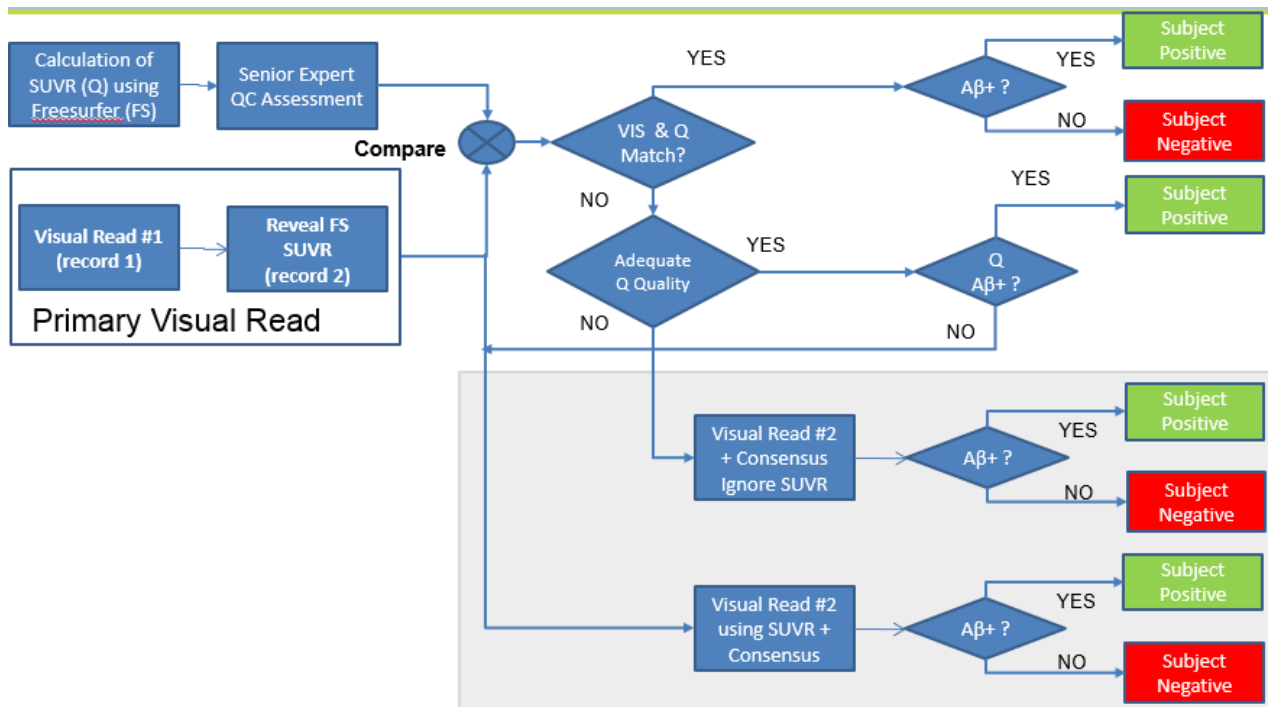

**Figure 3: PET Aβ Status Reading Workflow**
